# Supplementary material for: Total syntheses of pamamycin 607 and methyl nonactate: stereoselective cyclisation of homoallylic alcohols that had been prepared with remote stereocontrol using allylstannanes
Source: Royal Society of Chemistry journal article supplement (doi:10.1039/c2ob26801a), 2012-01-01
Supplement: c2ob26801a.pdf [file c2ob26801a.pdf]

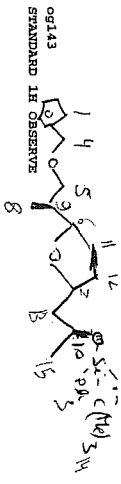

op143  
SPINRAMPD 1H OBSERVE  
Solvent: CDCl3  
Ambient temperature  
Sample #36  
File: 3601  
Queue name May24a  
DATE May 24 99  
INOVA-300 "aktios"  
PULSE SEQUENCE  
Relax. delay 3.300 sec  
Pulse 90.0 degrees  
Acq. time 3.641 sec  
Width 4499.9 Hz  
16 repetitions  
OBSERVE H1, 299.8458793 MHz  
DATA PROCESSING  
Line broadening 0.3 Hz  
F2 size 65536  
Total time 1 minutes

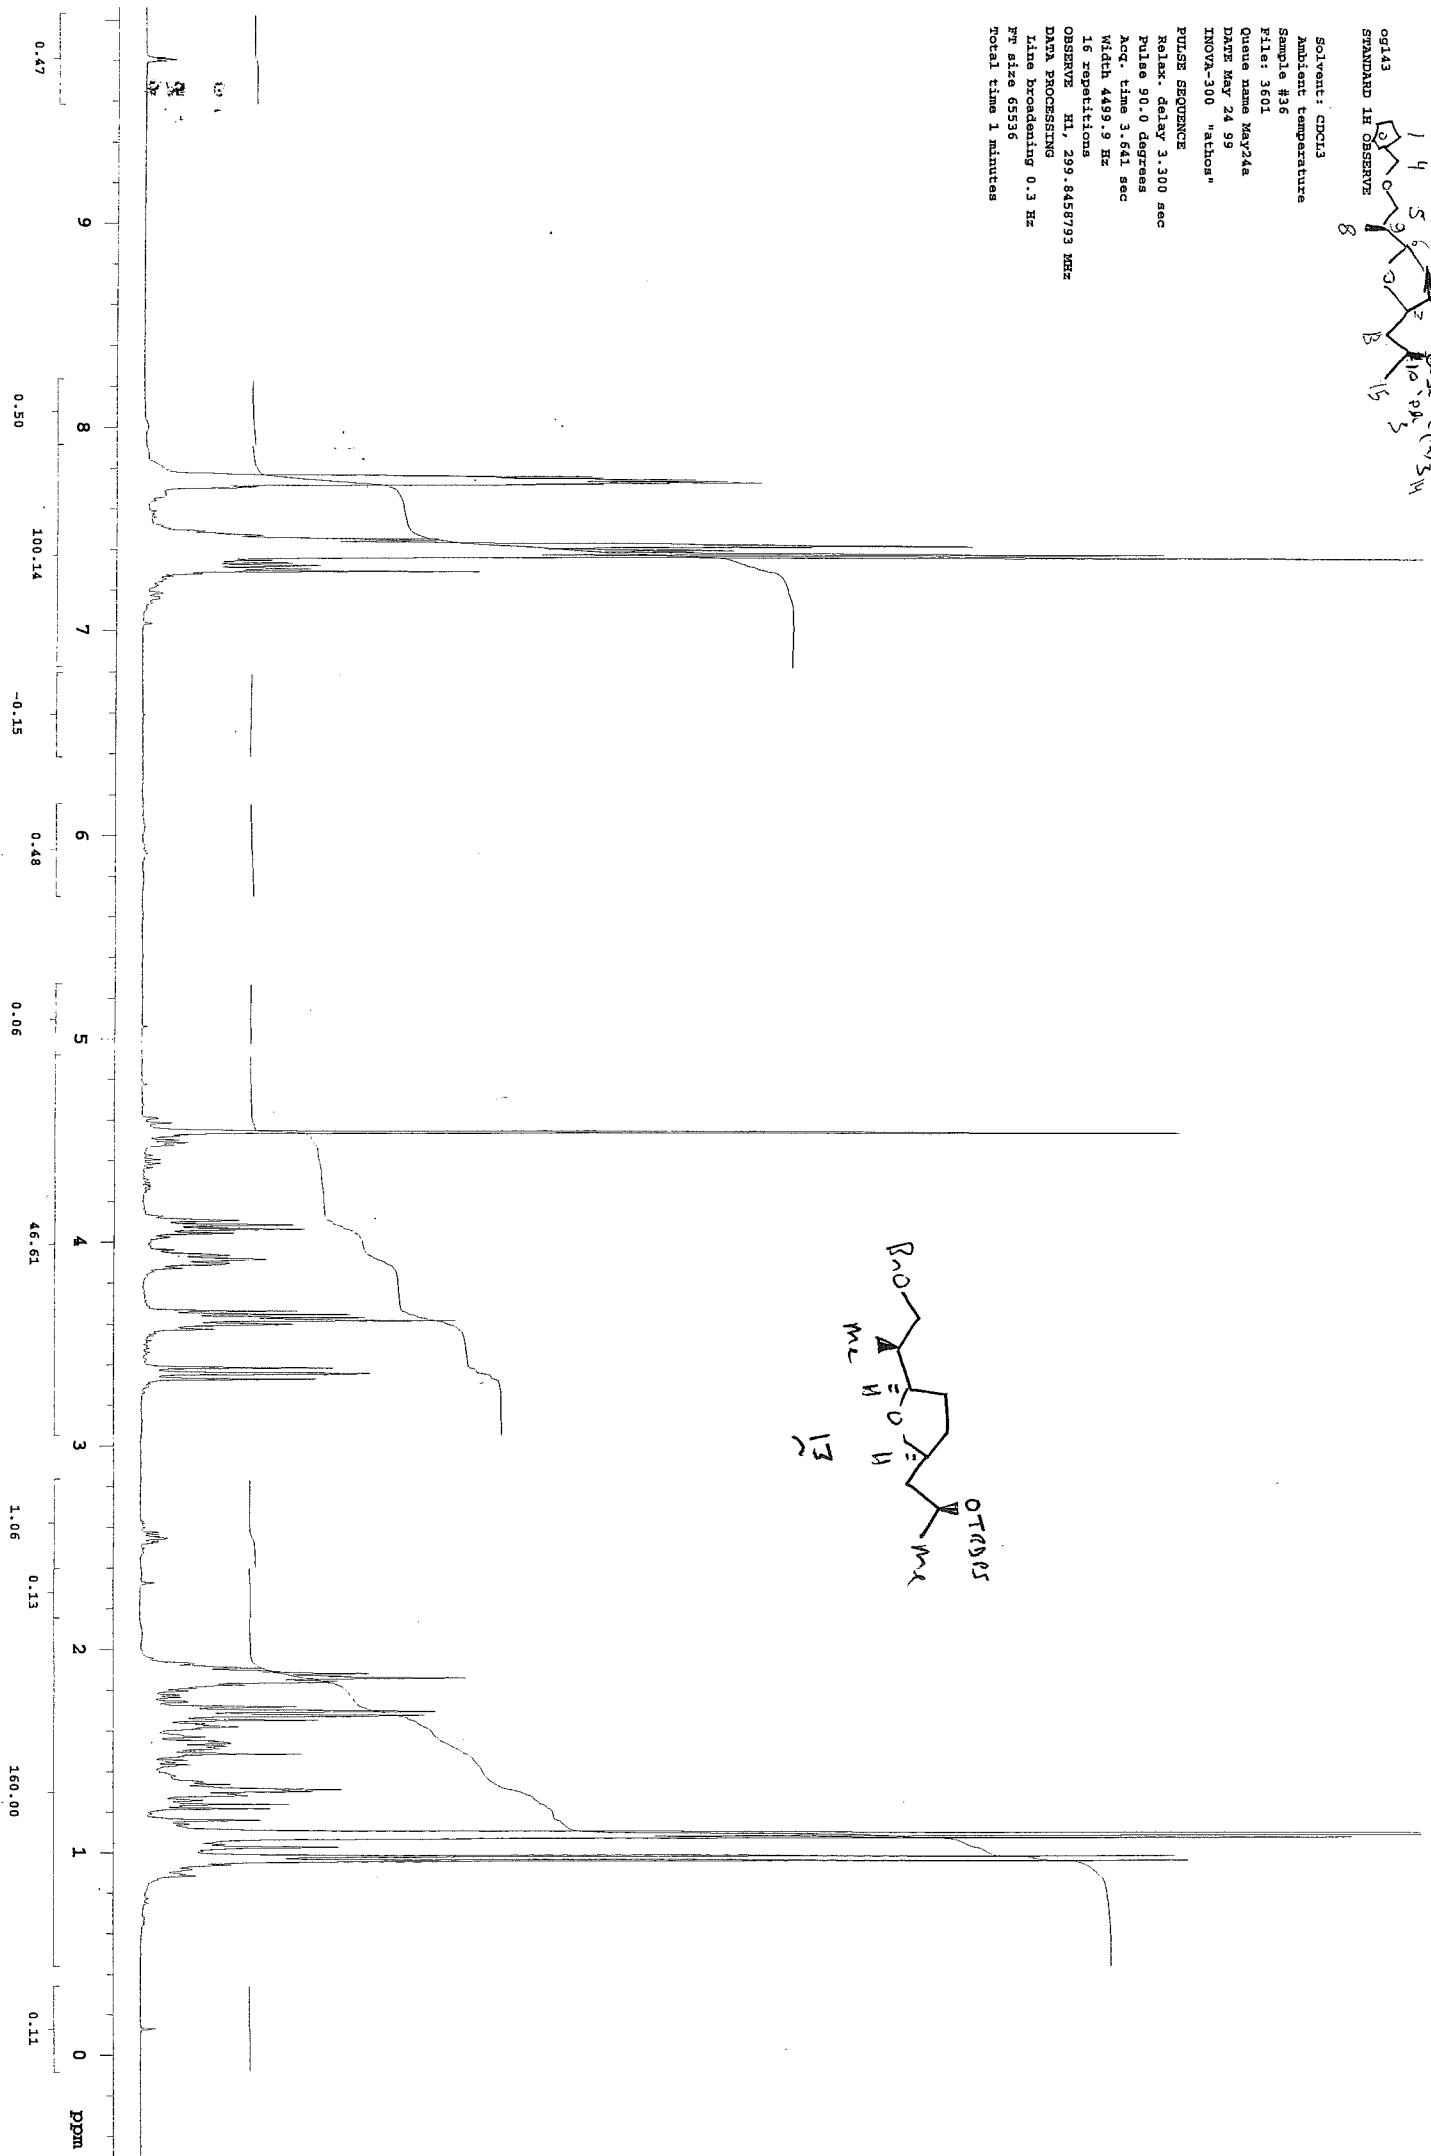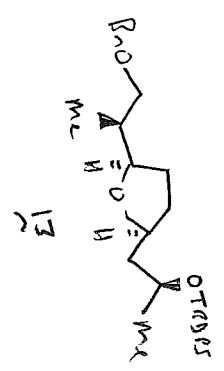

09143  
130 OBSERVE  
Solvent: CDCl3  
Ambient temperature  
Sample #2  
File: 201  
Queue name Kay24b  
Date May 24 99  
INOVA-300 "athos"  
PULSE SEQUENCE  
Pulse 45.0 degrees  
Acq. time 1.638 sec  
Width 20000.0 Hz  
544 repetitions  
OBSERVE C13, 75.3963141 MHz  
DECOUPLE H1, 299.8473789 MHz  
Power 40 dB  
continuously on  
WALTZ-16 modulated  
DATA PROCESSING  
Time broadening 1.0 Hz  
F2 size 65536  
Total time 14 minutes

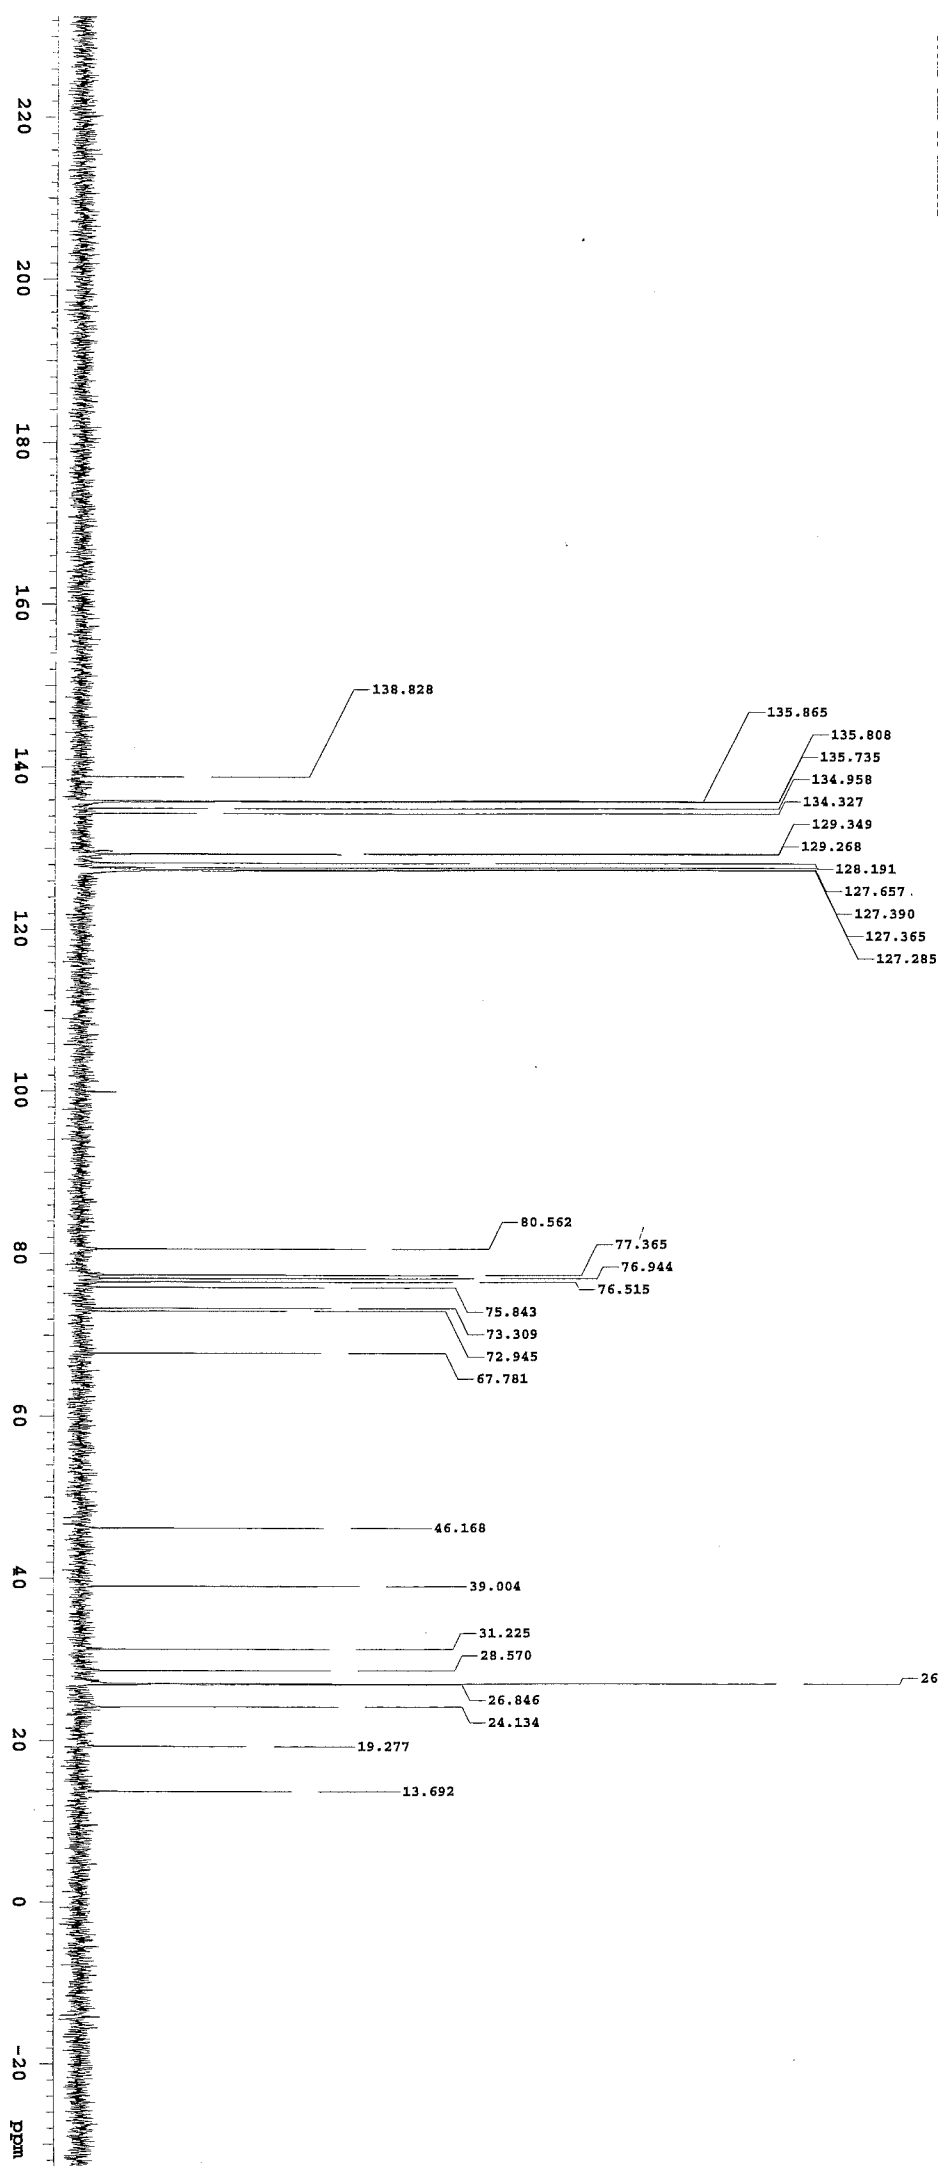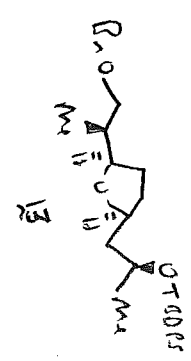

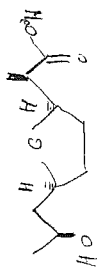

00167  
STANDARD 1H OBSERVE  
Solvent: CDCl3  
Ambient temperature  
Sample #9  
File: 901  
Queue name Jun24a  
DATE Jun 24 99  
INOVA-300 "athos"  
PULSE SEQUENCE  
Relax. delay 3.300 sec  
Pulse 90.0 degrees  
Acq. time 3.641 sec  
Width 4499.9 Hz  
16 repetitions  
OBSERVE H1, 299.8459075 MHz  
DATA PROCESSING  
Line broadening 0.3 Hz  
FT size 65536  
Total time 1 minutes

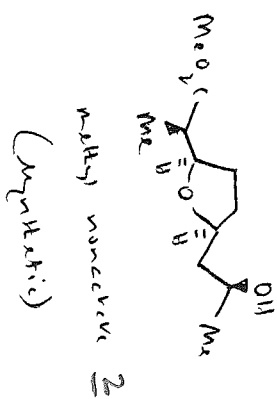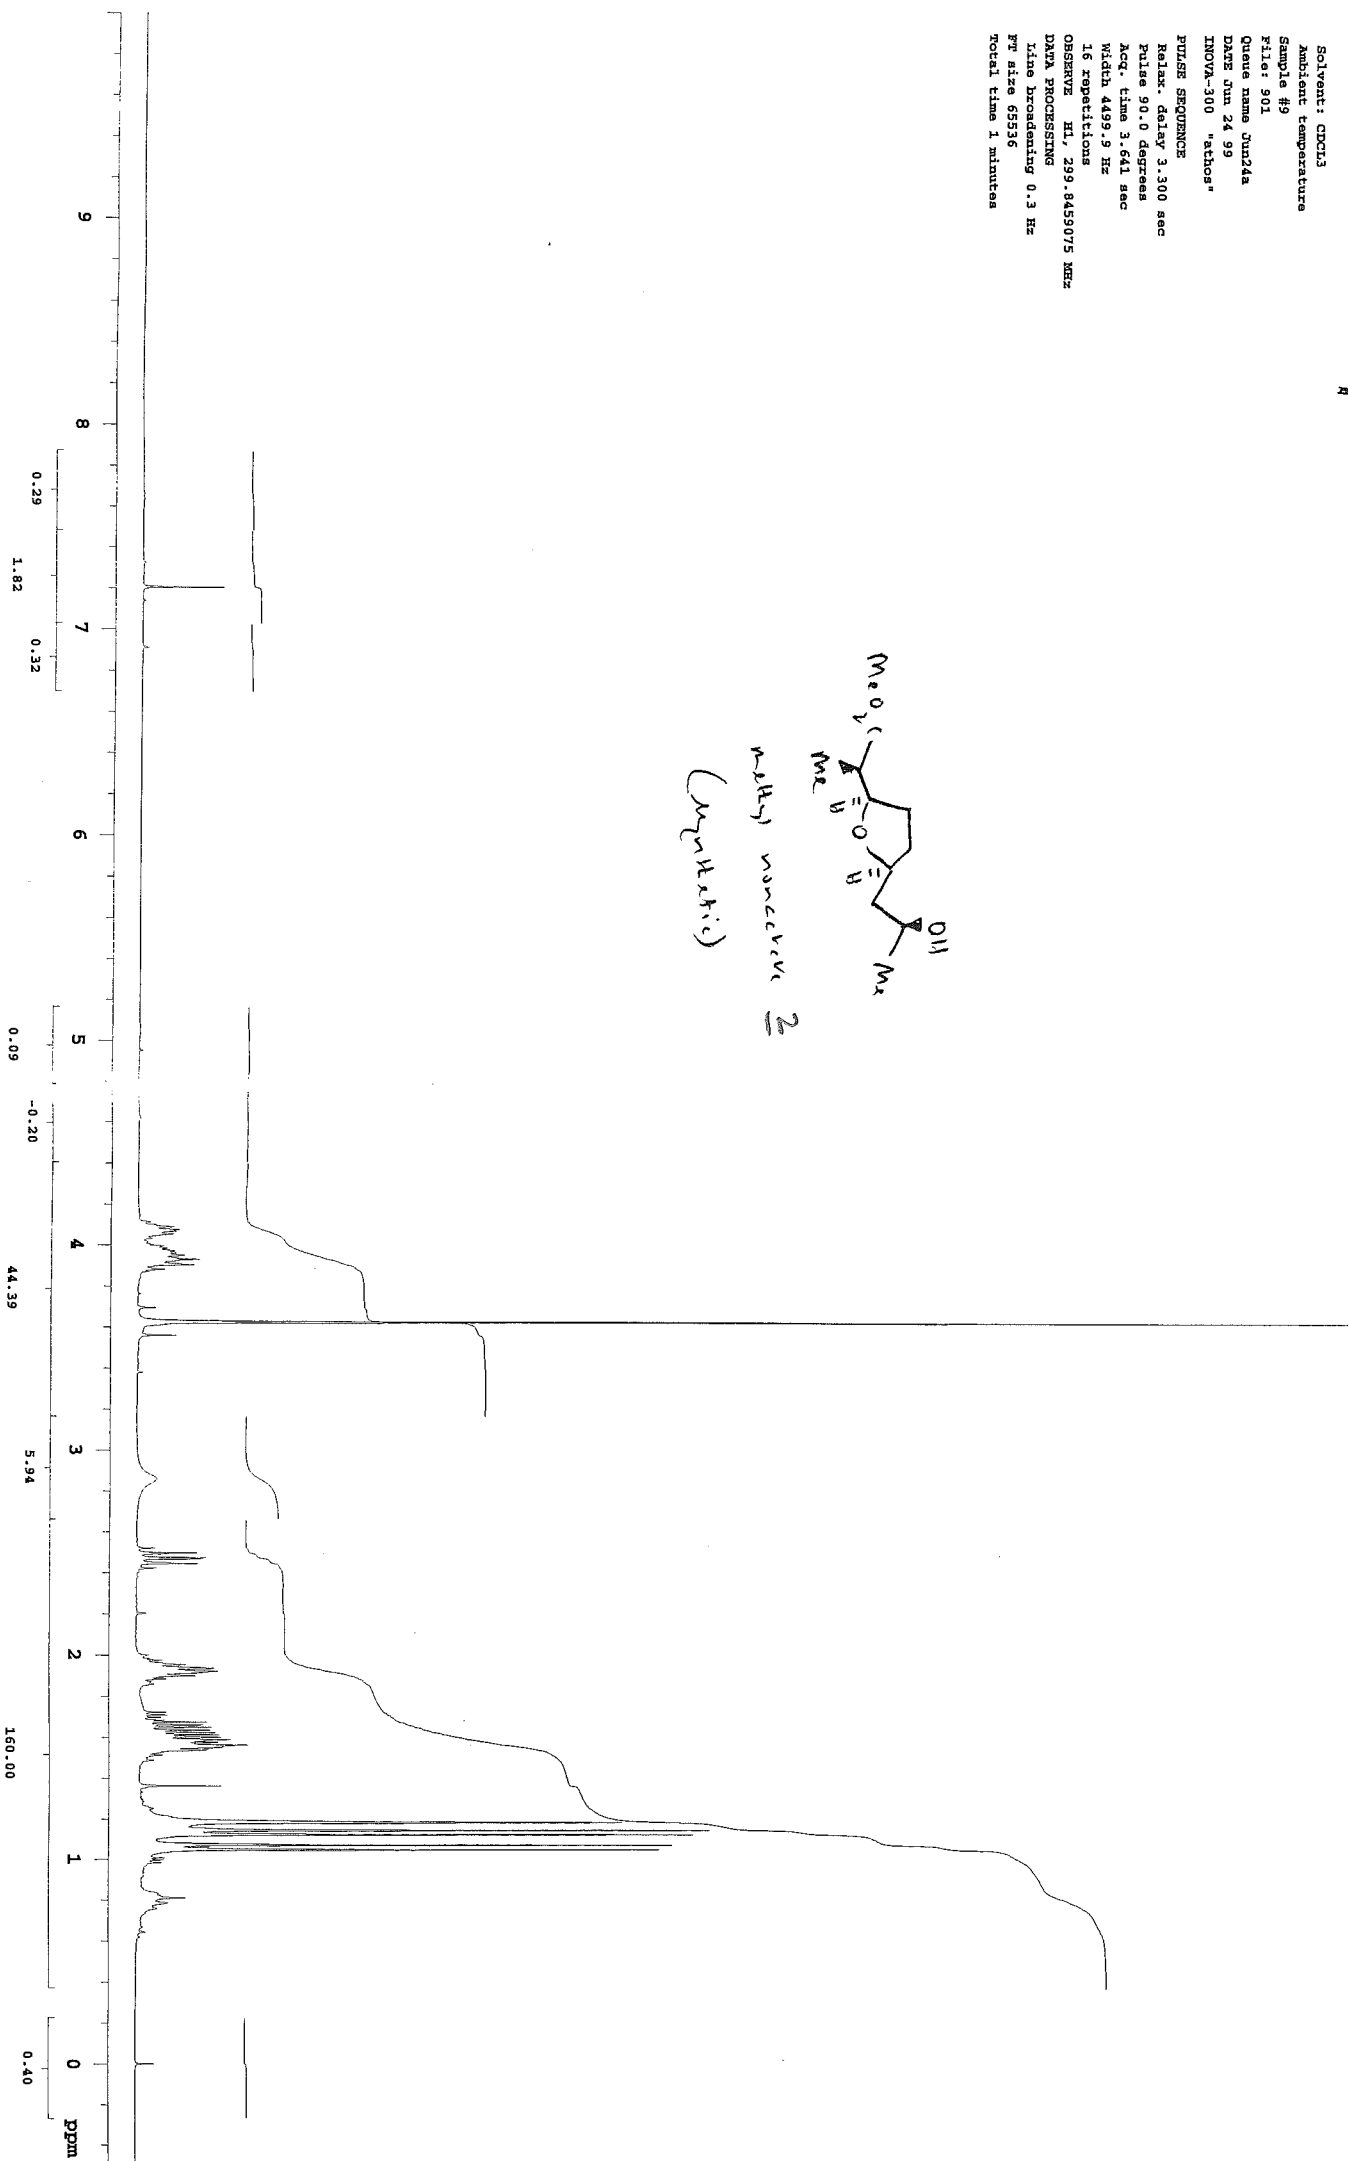

09167  
13C OBSERVEZ

Solvent: CDCl3  
Ambient temperature  
Sample #13  
File: 1301  
Queue name Jun28b  
DATE Jun 28 99  
INOVA-300 "athos"

PULSE SEQUENCE  
Pulse 45.0 degrees  
Acq. time 1.638 sec  
Width 20000.0 Hz  
1024 repetitions  
OBSERVE C13, 75.3963141 MHz  
DECOUPLE H1, 299.8473785 MHz  
Power 40 dB  
continuously on  
WALTZ-16 modulated  
DATA PROCESSING  
Line broadening 1.0 Hz  
F2 size 65536  
Total time 27 minutes

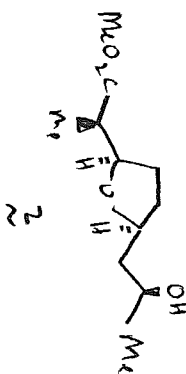

Methyl menthyl  
(synthetic)

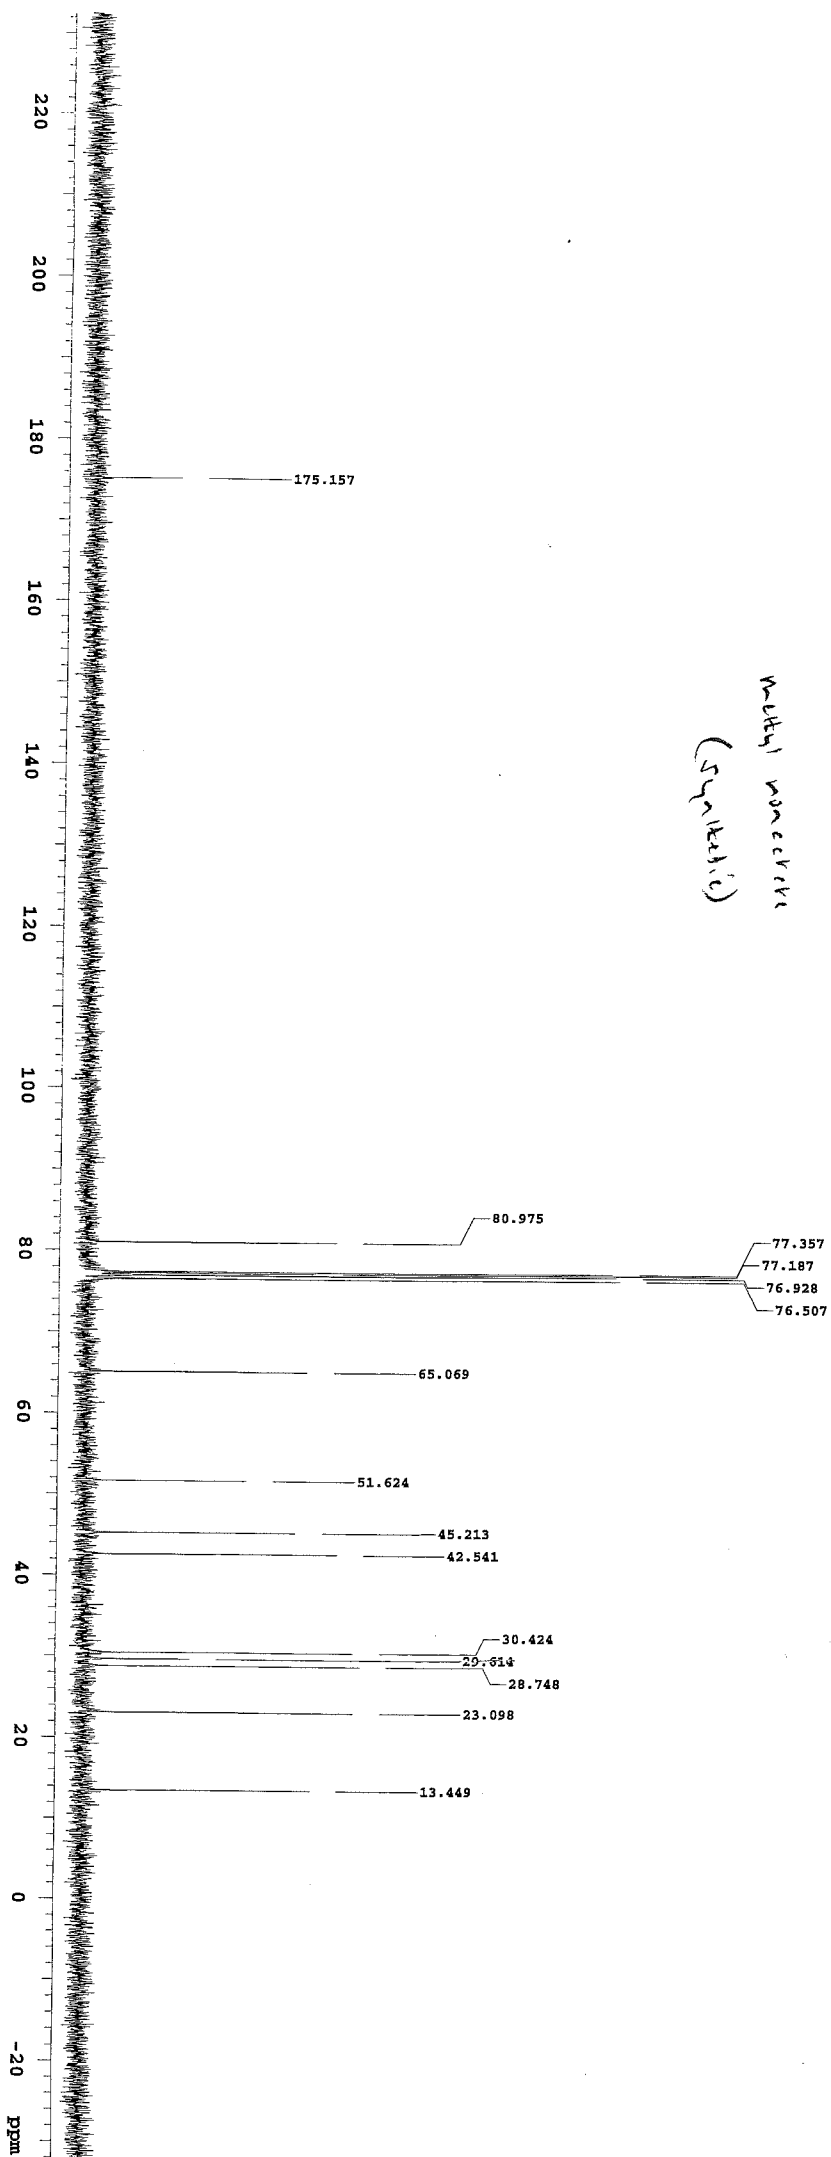

Nirash Kumar  
NR-498  
CDCl<sub>3</sub>  
INOVA 400 (RS)  
Aramis  
Proton 400MHz  
03.10.00  
283

Solvent: cdcl3  
Ambient temperature  
User: 1-12-87  
File: 283

DATE Oct 3 2000  
INOVA-300 "athos"

PULSE SEQUENCE

Relax. delay 5.000 sec

Pulse 36.0 degrees

Acq. time 3.996 sec

Width 5602.2 Hz

16 repetitions

OBSERVE H1, 399.9584367 MHz

DATA PROCESSING

FW size 65536

Total time 2 minutes

Integral Scale = 3500.0  
Vertical Scale = 200.0

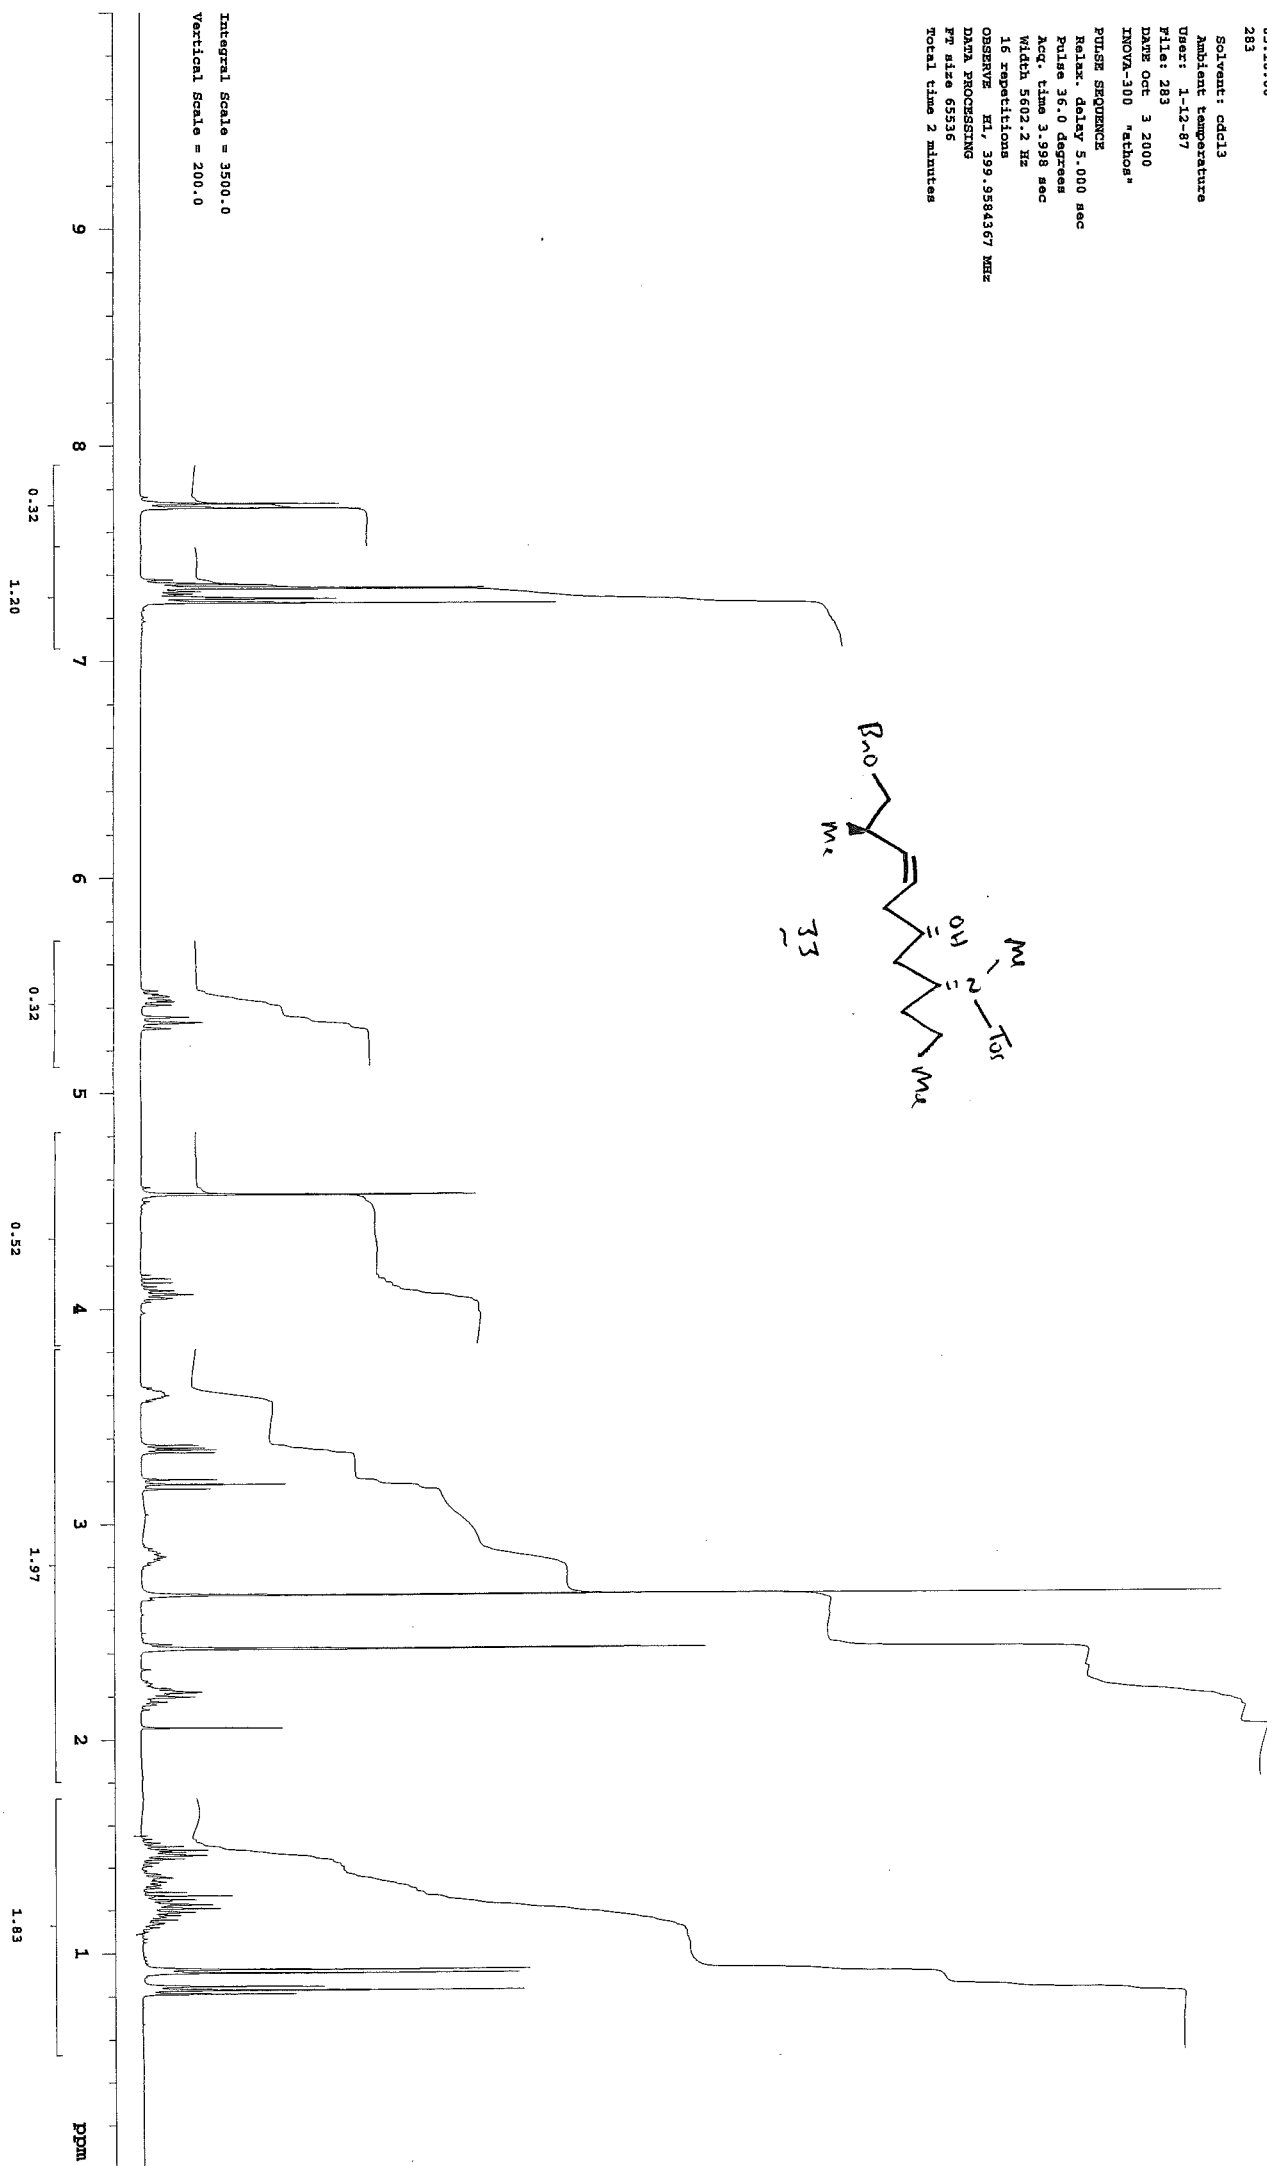

nk-291  
 STANDARD 1H OBSERVE

Solvent: CDCl3  
 Ambient temperature  
 Sample #3  
 File: 302  
 Queue name Jun10b  
 Date: Jun 10 99  
 INOVA-300 "athos"

PULSE SEQUENCE  
 Pulse 45.0 degrees  
 Acq. time 1.638 sec  
 Width 20000.0 Hz  
 784 repetitions

OBSERVE C13, 75.3963141 MHz  
 DECOUPLE H1, 299.8473785 MHz  
 Power 40 dB  
 continuously on

WALTZ-16 modulated  
 DATA PROCESSING  
 Line broadening 1.0 Hz  
 S.F. size 65536  
 Total time 21 minutes

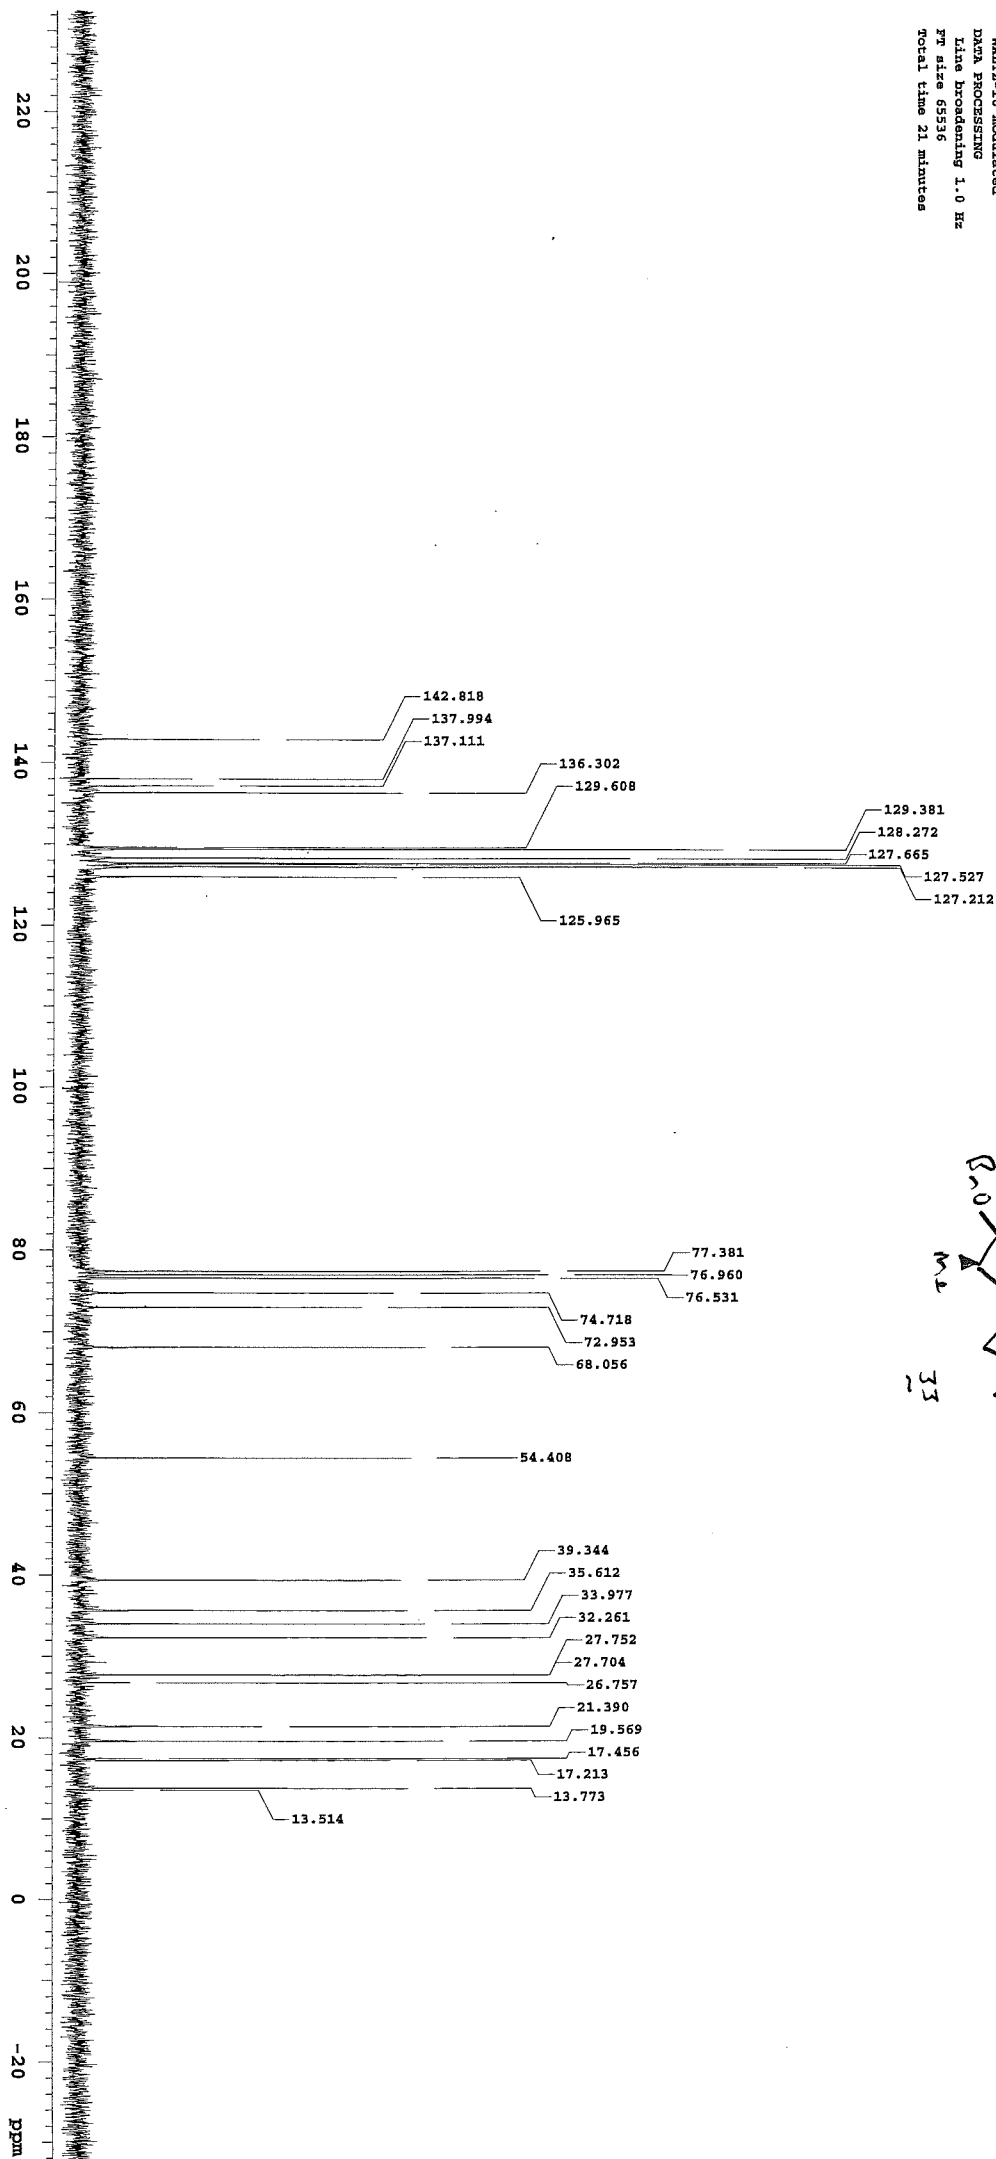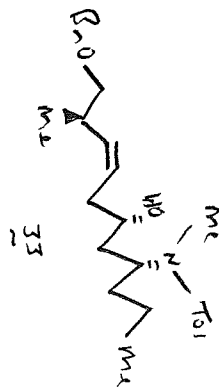

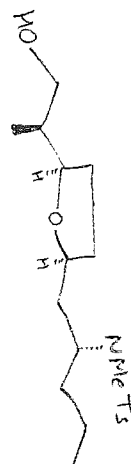

Nareesh Kumar  
cdcl3  
NR-364  
Talty 500 (TP)  
Standard H-1 parameters  
5 mm Nalorac probe  
14.09.99  
977

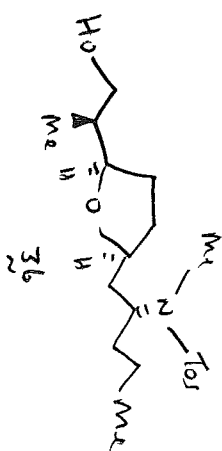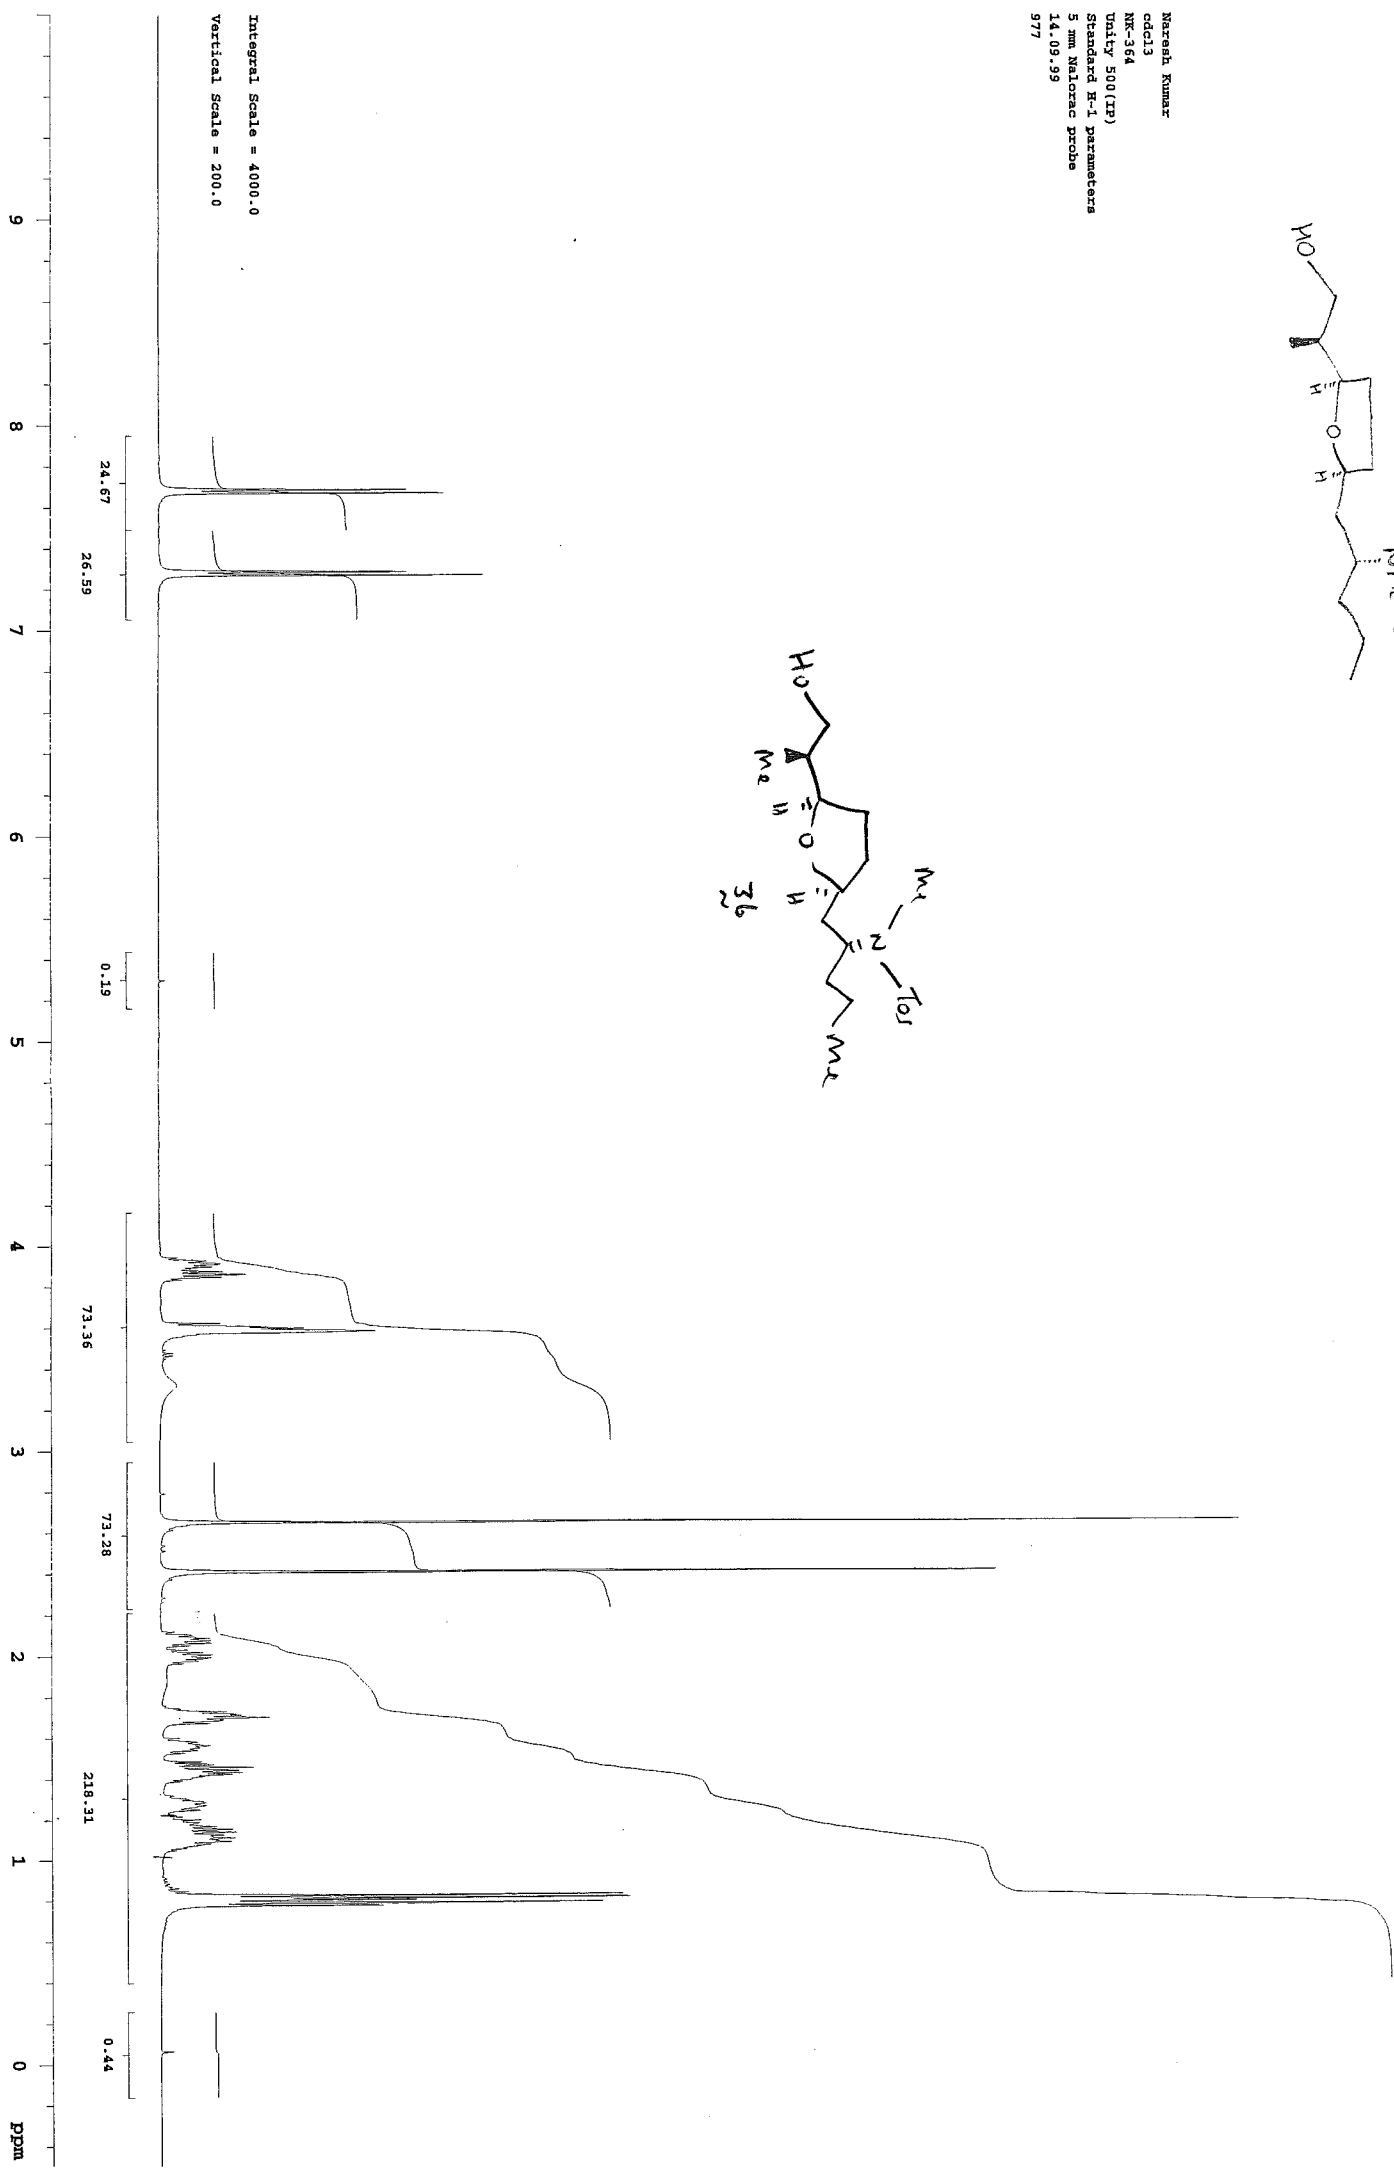

Nitesh Kumar  
NR-364  
cdCl<sub>3</sub>  
Unity 500 (IP)  
C-13 Fast pulses  
NMRORAC 5 mm B1 probe  
14.09.99  
977c

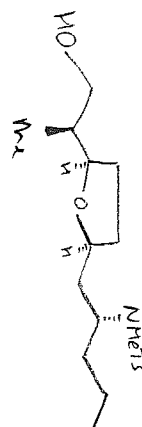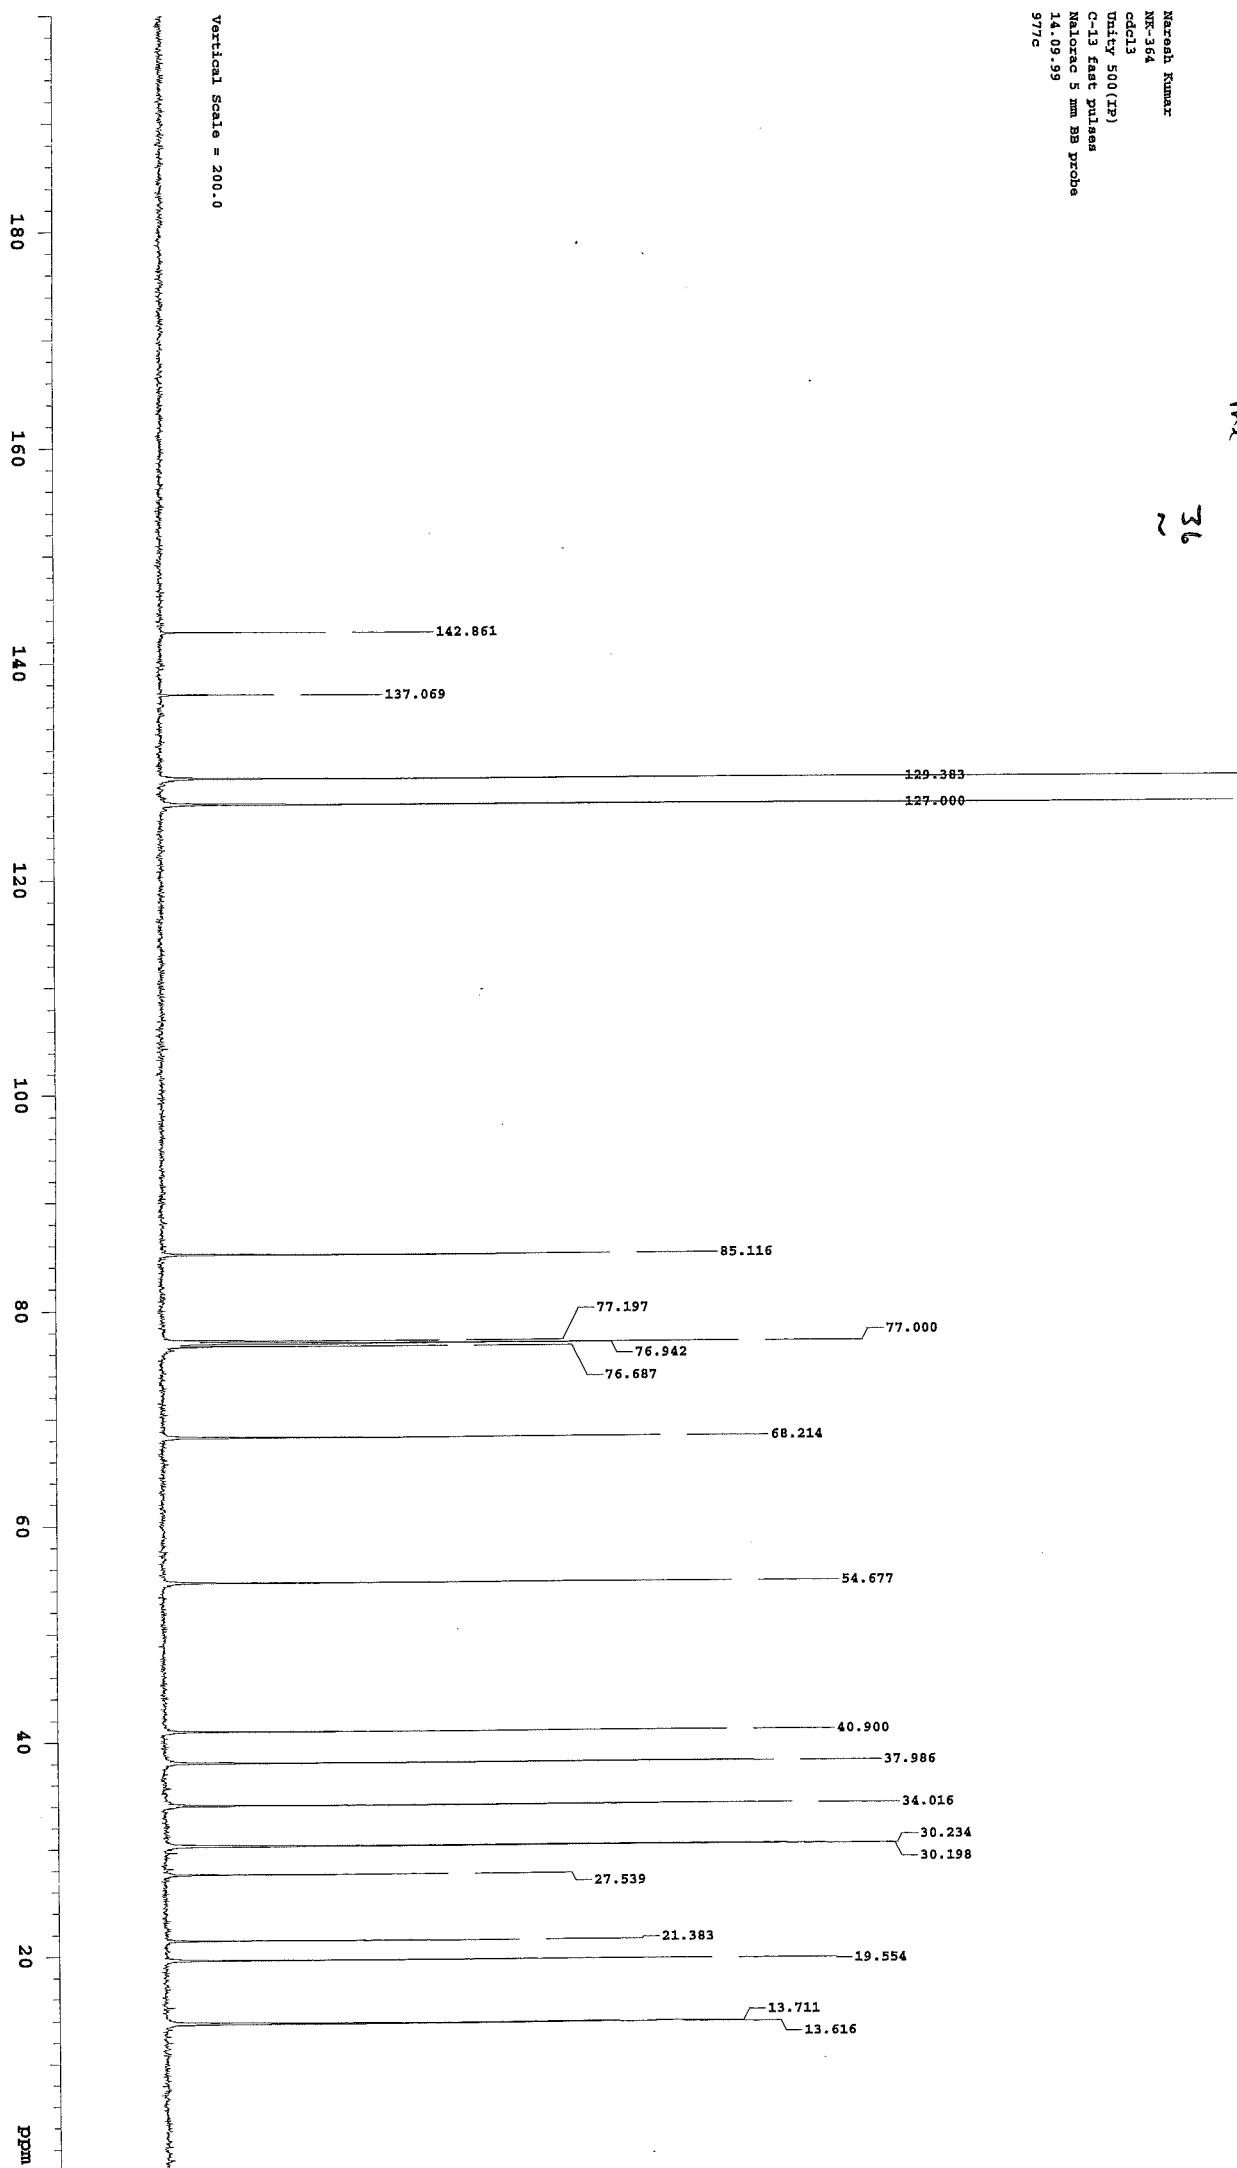



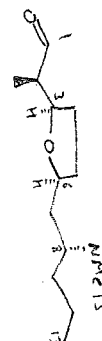

HR-369-I  
STANDARD 1H OBSERVE  
Solvent: CDCl3  
Ambient temperature  
Sample #26  
File: 2601  
Queue name Sep15a  
Date Sep 15 99  
INOVA-300 "athos"  
PULSE SEQUENCE  
Relax. delay 3.300 sec  
Pulse 90.0 degrees  
Acq. time 3.641 sec  
Width 4499.9 Hz  
16 repetitions  
OBSERVE H1, 299.8459091 MHz  
DATA PROCESSING  
Line broadening 0.3 Hz  
F1 size 65536  
Total time 1 minutes

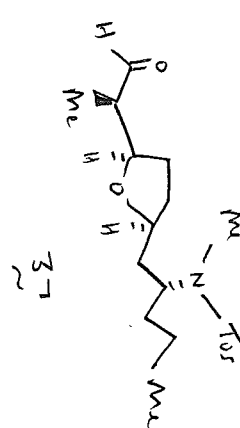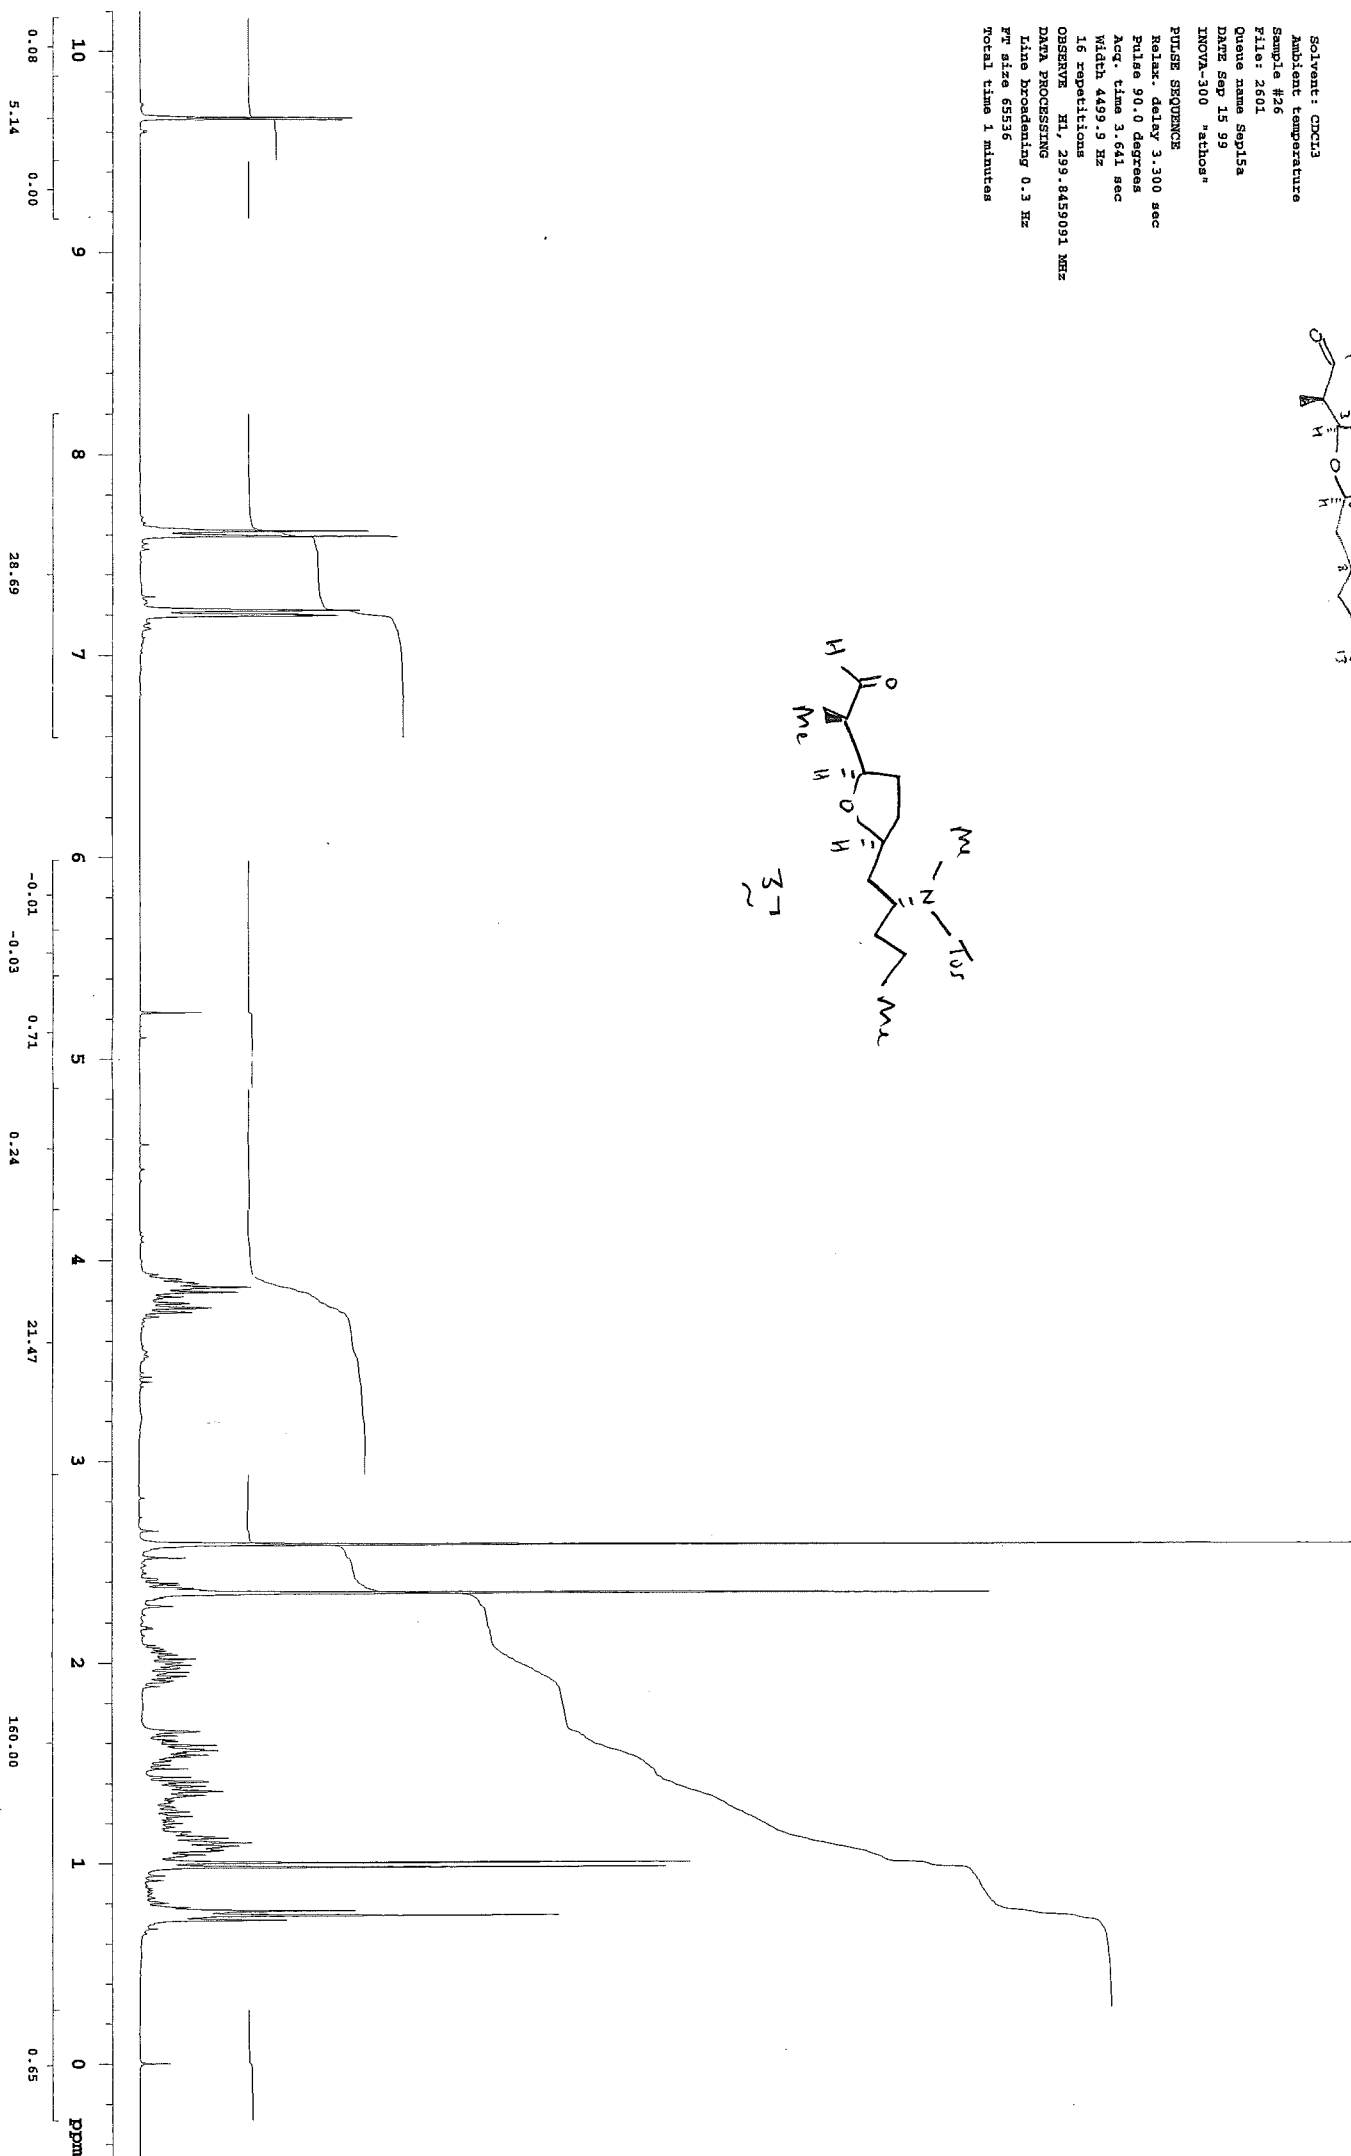

nk-460 aldehyde  
13C OBSERVE

Solvent: CDCl3  
Ambient temperature  
Sample #39  
File: 3901  
Queue name May25a  
DATE May 25 00  
INOVA-300 "athos"

PULSE SEQUENCE  
Pulse 45.0 degrees  
Acq. time 1.638 sec  
Width 20000.0 Hz  
1024 repetitions  
OBSERVE C13, 75.3963141 MHz  
DECOUPLE H1, 299.8473785 MHz  
Power 40 dB  
continuously on  
WALTZ-16 modulated  
DATA PROCESSING  
Line broadening 1.0 Hz  
FW size 65536  
Total time 27 minutes

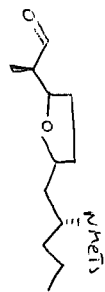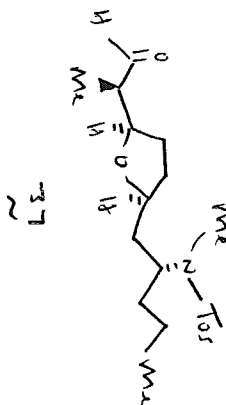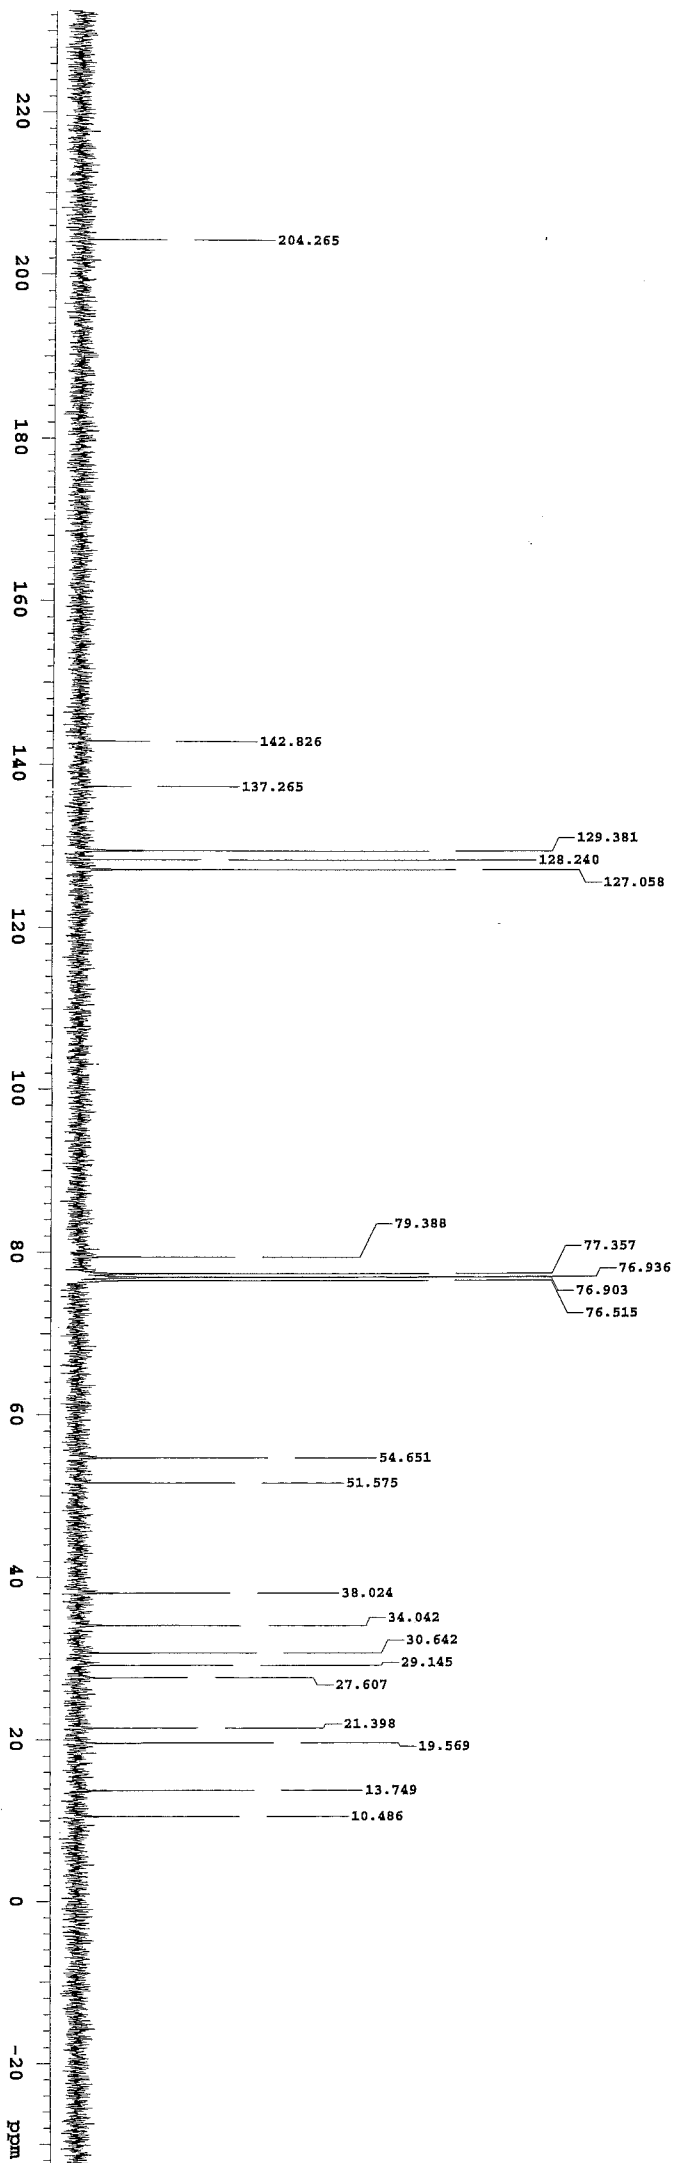

N Kumar  
 NR-405 B  
 cdcl3  
 H1  
 196  
 5 mm PFG triple probe  
 Unity 500(PJK)  
 21-12-99

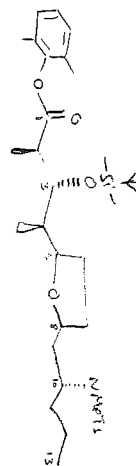

Solvent: cdcl3  
 Ambient temperature  
 User: 1-15-87  
 File: 196  
 Date Dec 21 99  
 INOVA-300 "athos"  
 PULSE SEQUENCE  
 Relax. delay 5.000 sec  
 Pulse 101.4 degrees  
 Acq. time 4.000 sec  
 Width 7000.4 Hz  
 16 repetitions  
 OBSERVE H1, 499.8462700 MHz  
 DATA PROCESSING  
 Line broadening 0.3 Hz  
 F2 size 65536  
 Total time 2 minutes  
 PLOTTING SCALE  
 Vertical Scale 200.0  
 Integral Scale 800.0

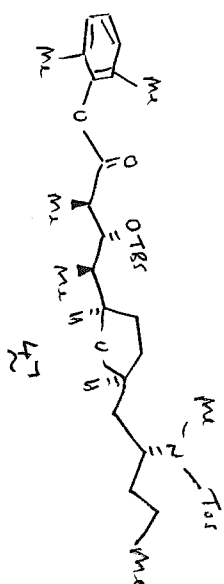

Spectrum Number = 1.0  
 Vertical Scale = 200.0  
 Integral Scale = 800.0

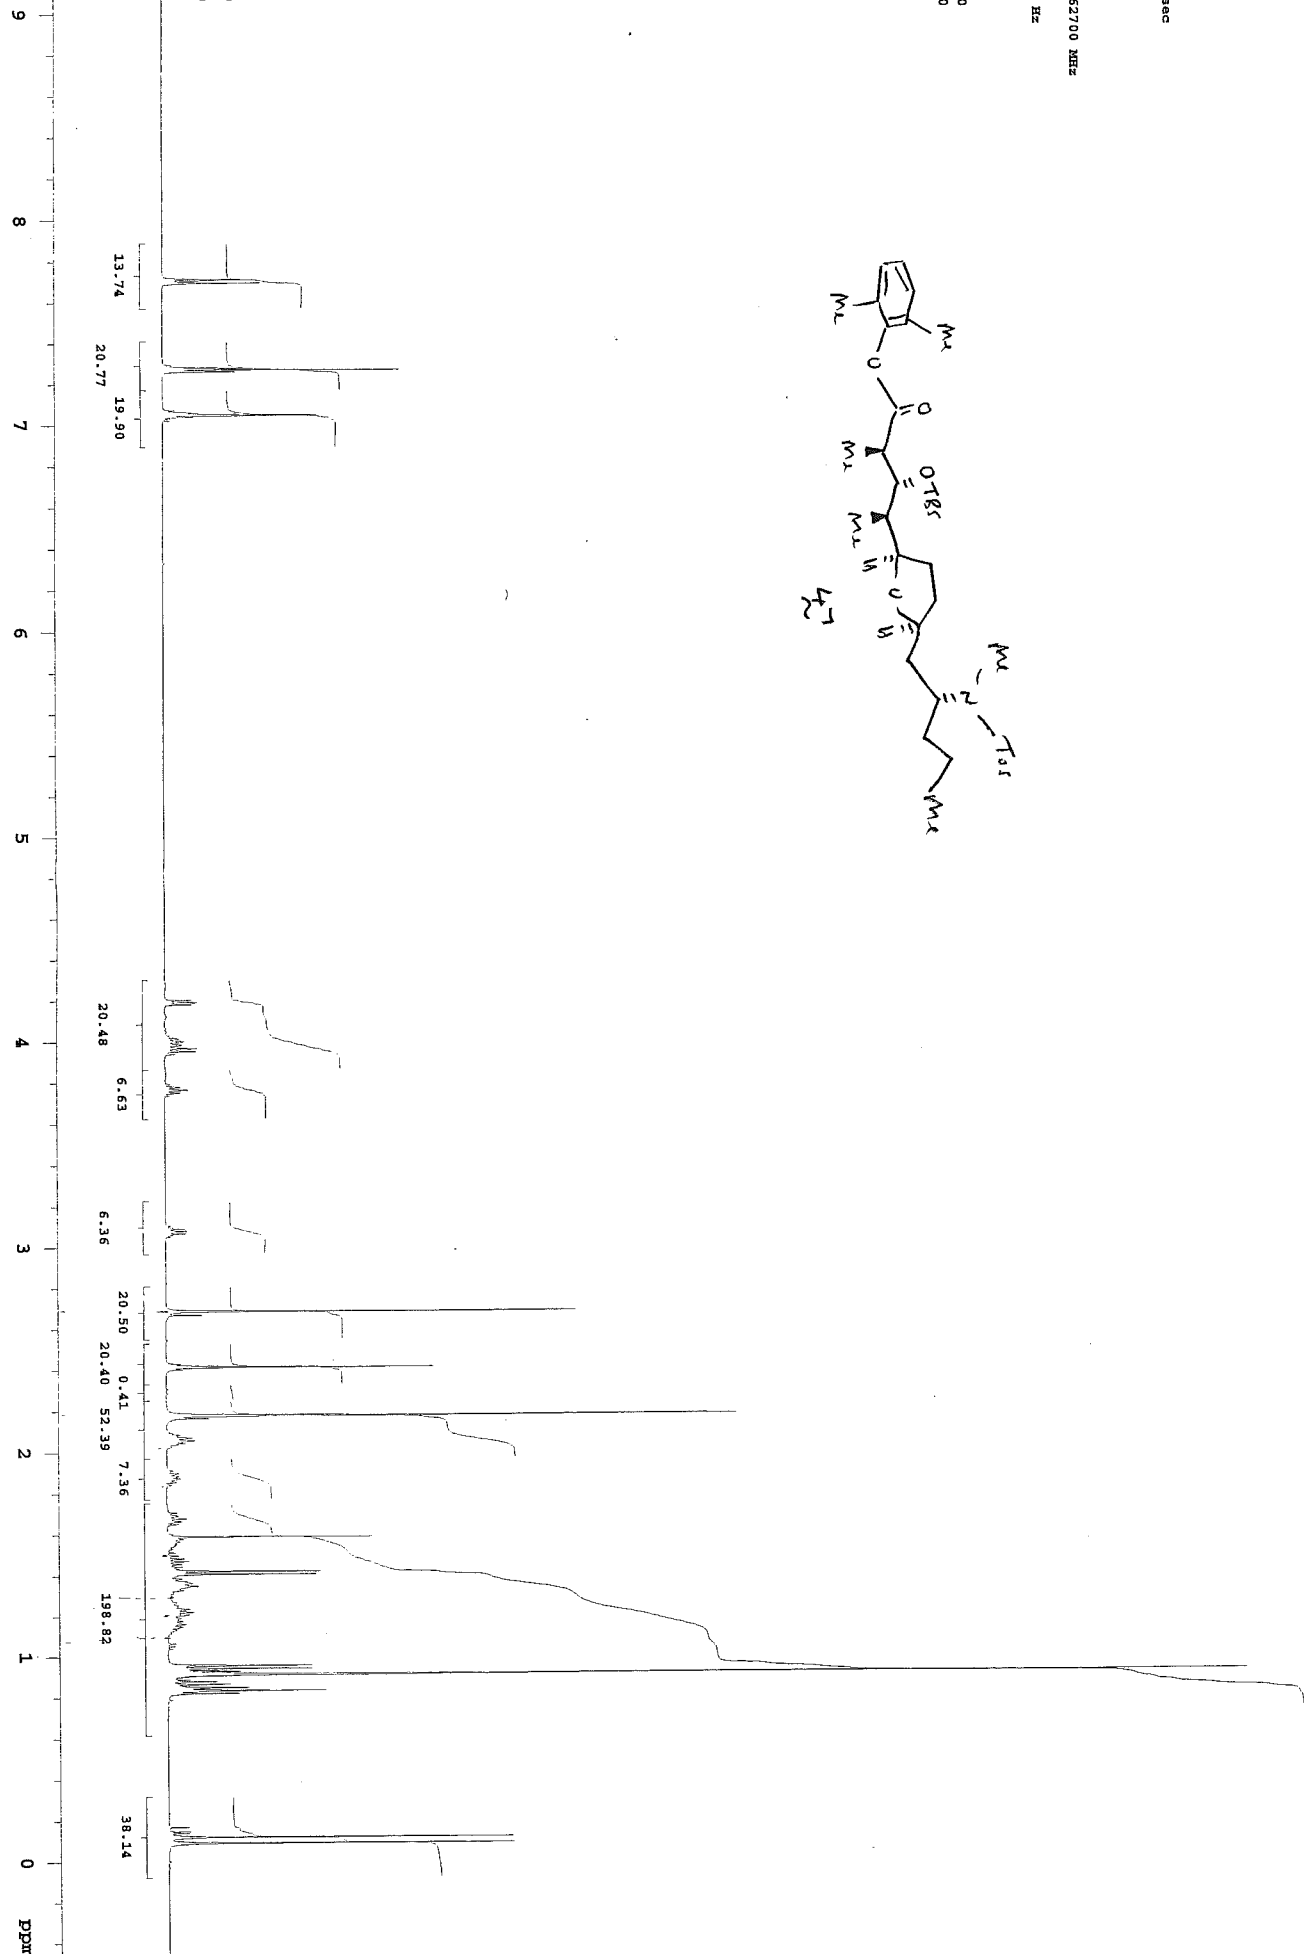

N Kumar  
NR-405B  
cdcl3  
196c  
Nalozaric 5 mm BB probe  
unity 500(pmk)  
17-01-00

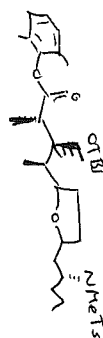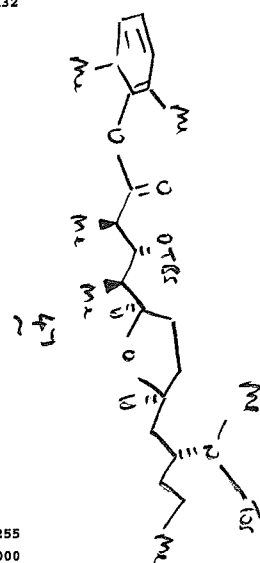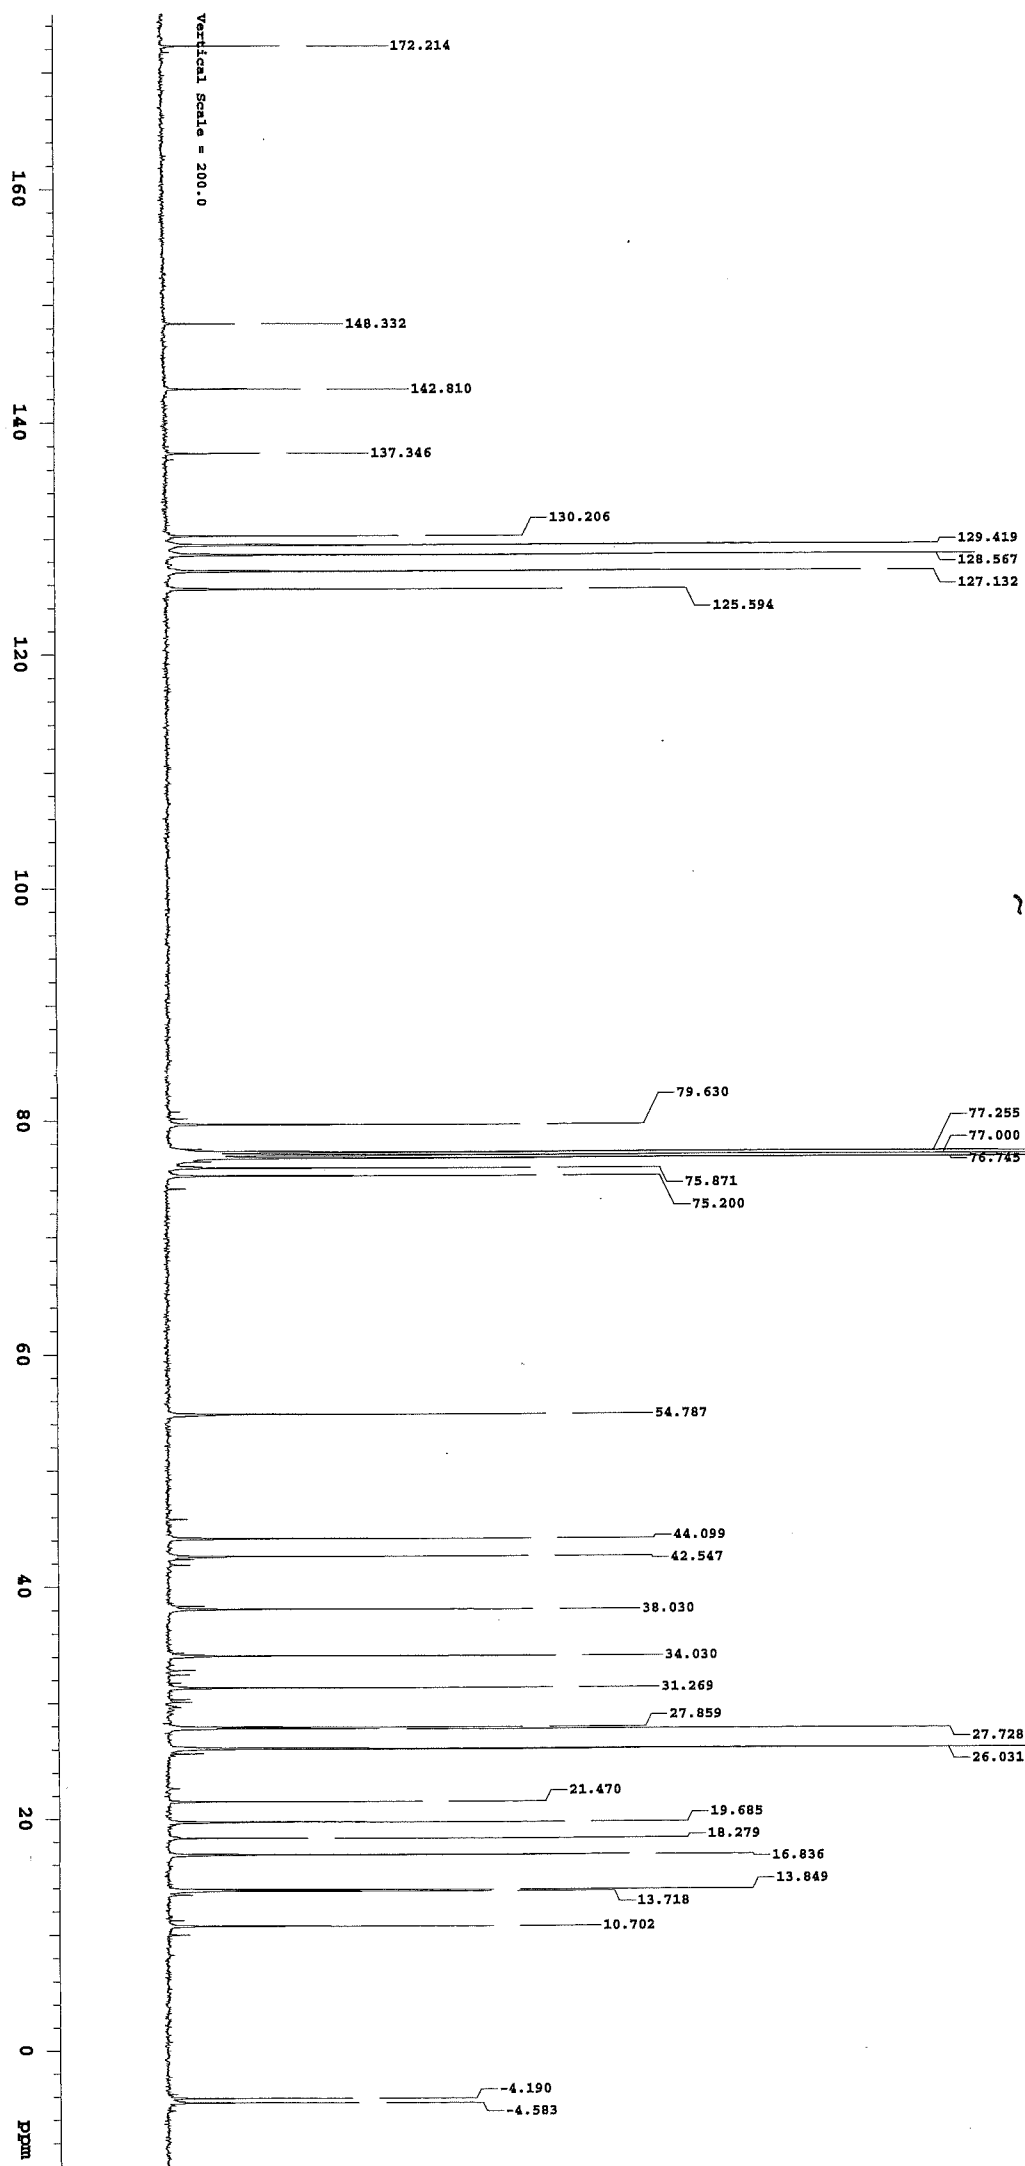

N. Kumar  
MR-405A  
edc13  
M1  
171  
5 mm pfg triple probe  
Unity 500 (PXX)  
14-12-99

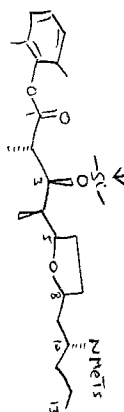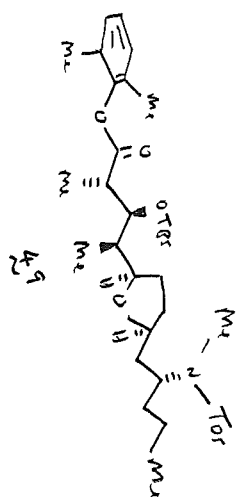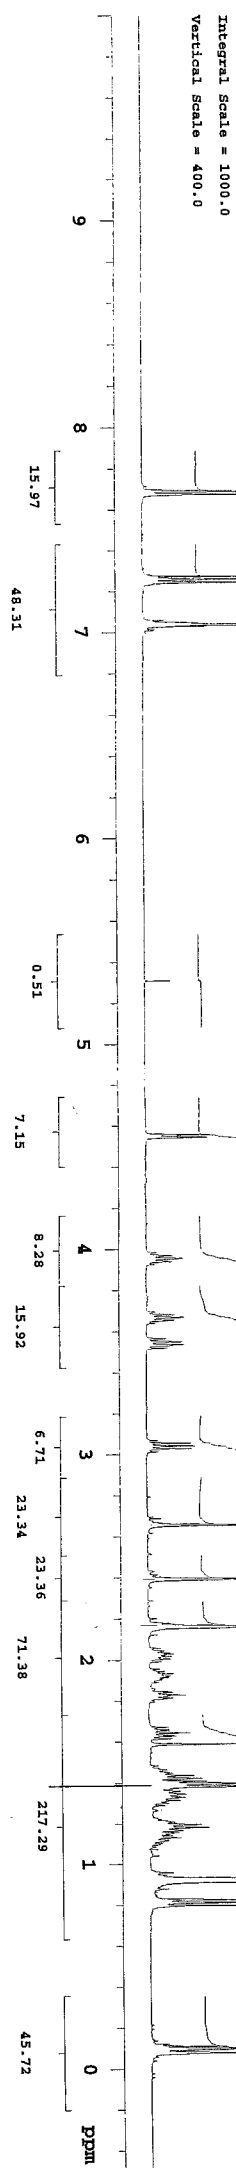

N Kumar  
NR-405A  
cdcl3  
171c  
Maltovac 5 mm BB probe  
Unity 500(BUK)  
06-01-00

Solvent: cdcl3  
Ambient temperature  
User: 1-15-87  
File: 171  
Date Jan 6 00  
INOVA-300 "athos"

PULSE SEQUENCE  
Pulse 54.0 degrees  
Acq. time 1.005 sec  
Width 30007.5 Hz

54511 repetitions  
OBSERVE C13, 125.6864445 MHz  
DECOUPLE H1, 499.8480247 MHz  
Power 37 dB  
continuously on

WALTZ-16 modulated  
DATA PROCESSING  
Line broadening 3.0 Hz  
F2 size 65536  
Total time 15.2 hours  
PLOTTING SCALE  
Vertical Scale 200.0  
Integral Scale 8000.0

256

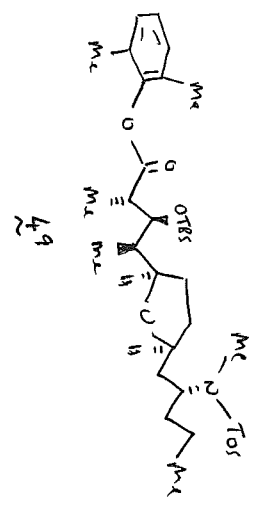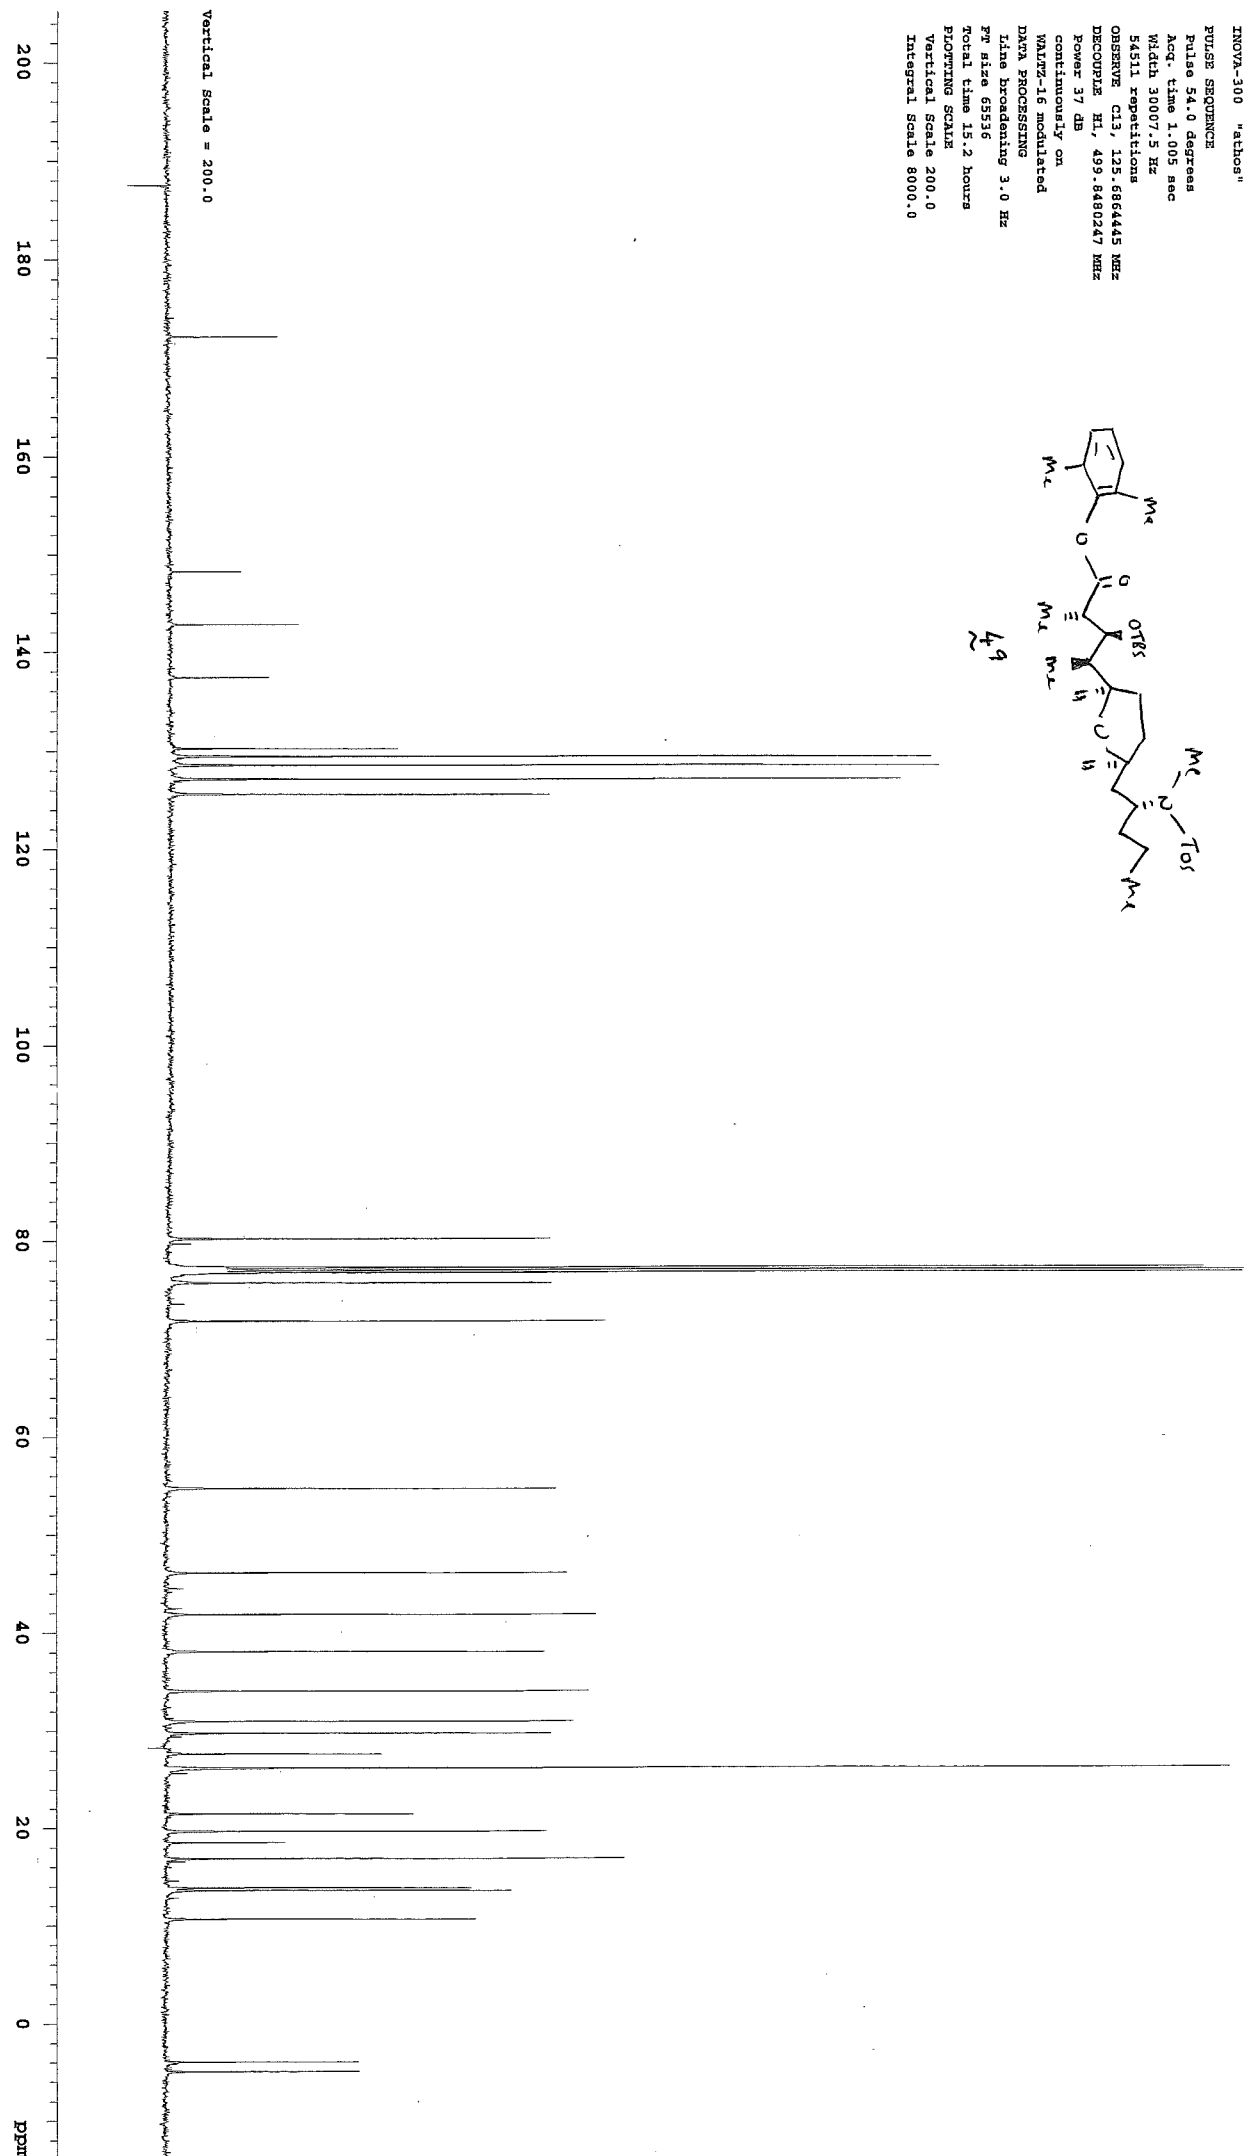

N Kumar  
NR-401  
cdcl3  
H1  
170  
5 mm PFG triple probe  
Unity 500(ERT)  
21-12-99

Solvent: cdcl3  
Ambient temperature  
User: 1-15-87  
File: 170  
Date Dec 21 99  
INOVA-300 "athos"

PULSE SEQUENCE  
Relax. delay 5.000 sec  
Pulse 101.4 degrees  
Acq. time 4.000 sec  
Width 7000.4 Hz  
16 repetitions  
OBSERVE H1, 499.8462700 MHz  
DATA PROCESSING  
Line broadening 0.3 Hz  
PT size 65536  
Total time 2 minutes  
PLOTTING SCALE  
Vertical Scale 200.0  
Integral Scale 1500.0

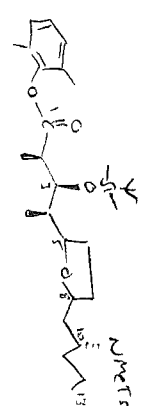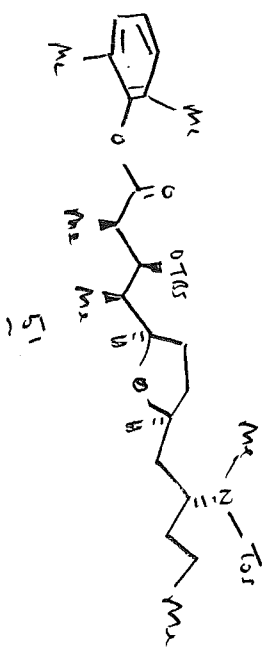

Spectrum Number = 1.0  
Vertical Scale = 200.0  
Integral Scale = 1500.0

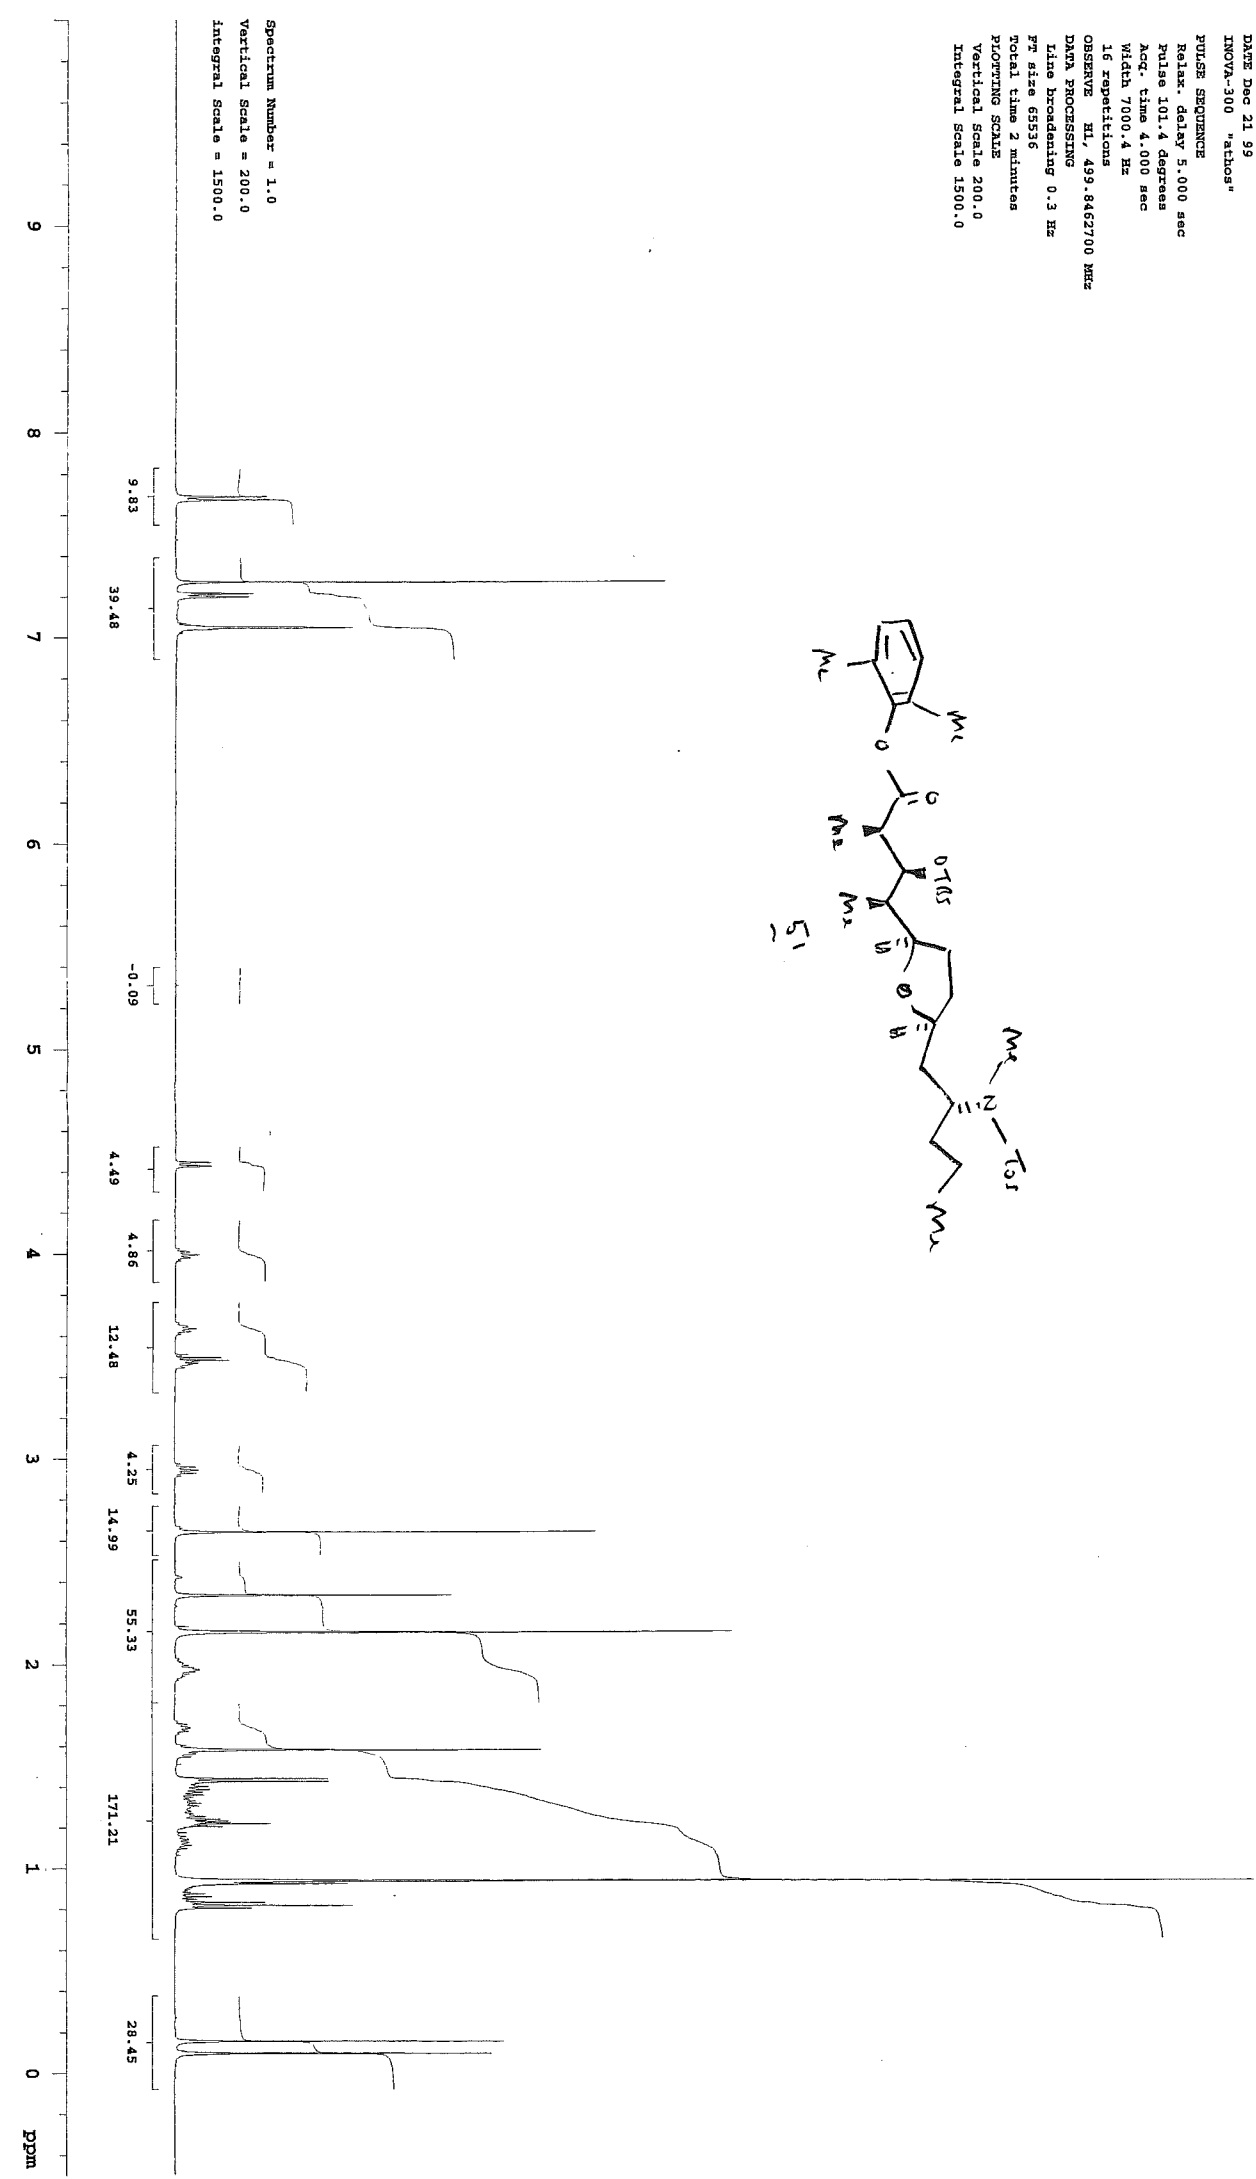

N Kromar  
NR-401  
cdCl3  
170c  
Nalorac 5 mm BB probe  
Inlet: 500 (P/M)  
21-12-99

Solvent: cdCl3  
Ambient temperature  
User: 1-15-97  
File: 170  
DATE Dec 21 99  
INOVA-300 "athos"

PULSE SEQUENCE  
Pulse 54.0 degrees  
Acq. time 1.005 sec  
Width 30007.5 Hz  
52174 repetitions  
OBSERVE C13, 125.686464 MHz  
DECUPLE H1, 499.8480247 MHz  
Power 37 dB  
continuously on  
WALTZ-16 modulated  
DATA PROCESSING  
Line broadening 3.0 Hz  
F2 size 65536  
Total time 14.6 hours

PIPING SCALE  
Vertical Scale 200.0  
Integral Scale 8000.0

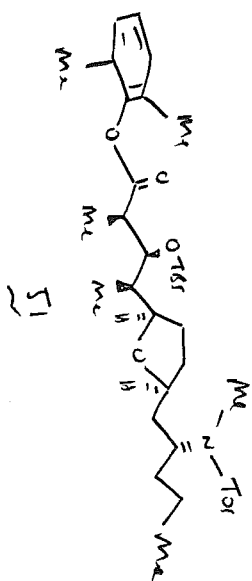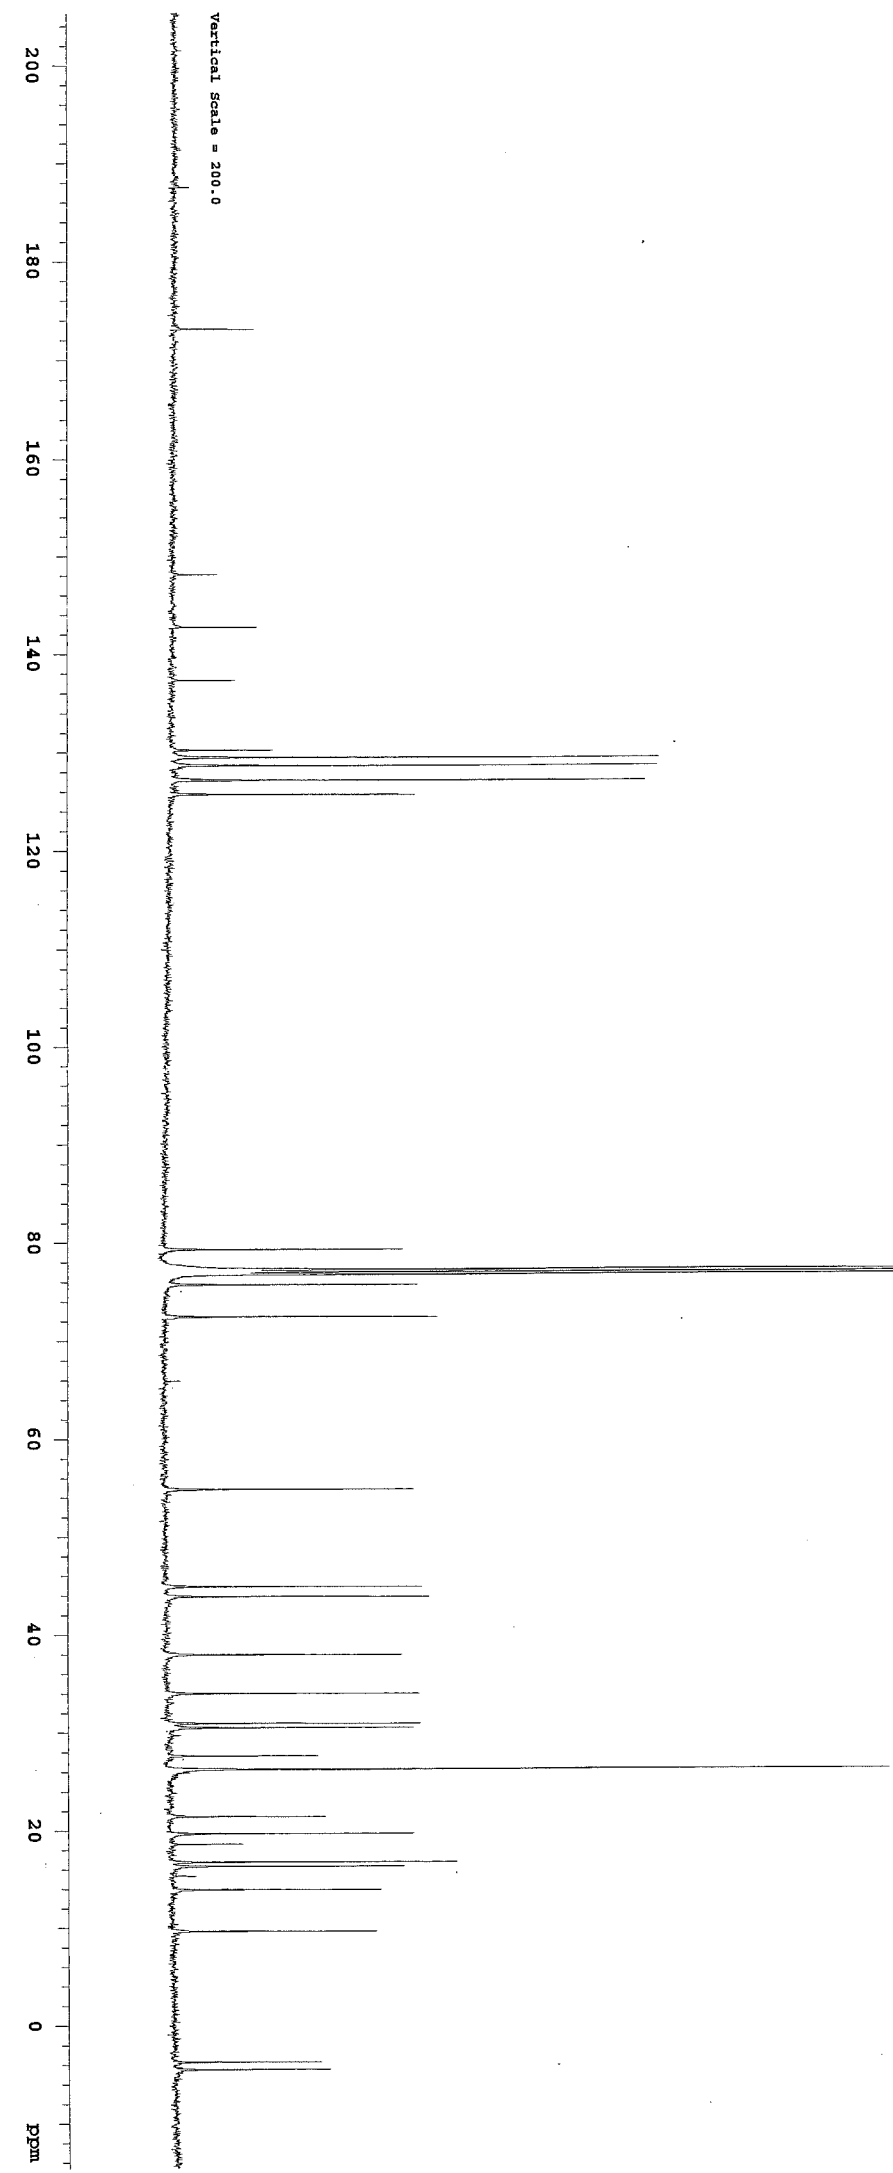



Narresh Kumar  
NK-441  
cdcl3  
Unity 500 (IP)  
Standard H-1 parameters  
5 mm Nalorac probe  
11.04.00  
589

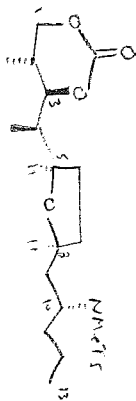

Solvent: cdcl3  
Ambient temperature  
User: 1-15-87  
File: 589  
UNITRY-500 "pized"  
PULSE SEQUENCE  
Relax. delay 5.000 sec  
Pulse 162.2 degrees  
Acq. time 4.000 sec  
Width 7000.4 Hz  
16 repetitions  
OBSERVE H1, 499.8462700 MHz  
DATA PROCESSING  
Line broadening 0.3 Hz  
PR size 65536  
total time 2 minutes  
PLOTTING SCALE  
Vertical Scale 200.0  
Integral Scale 3000.0

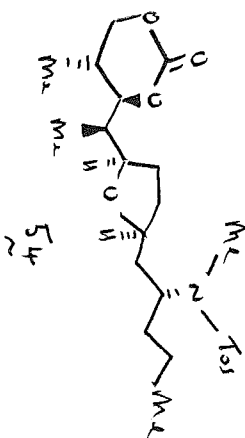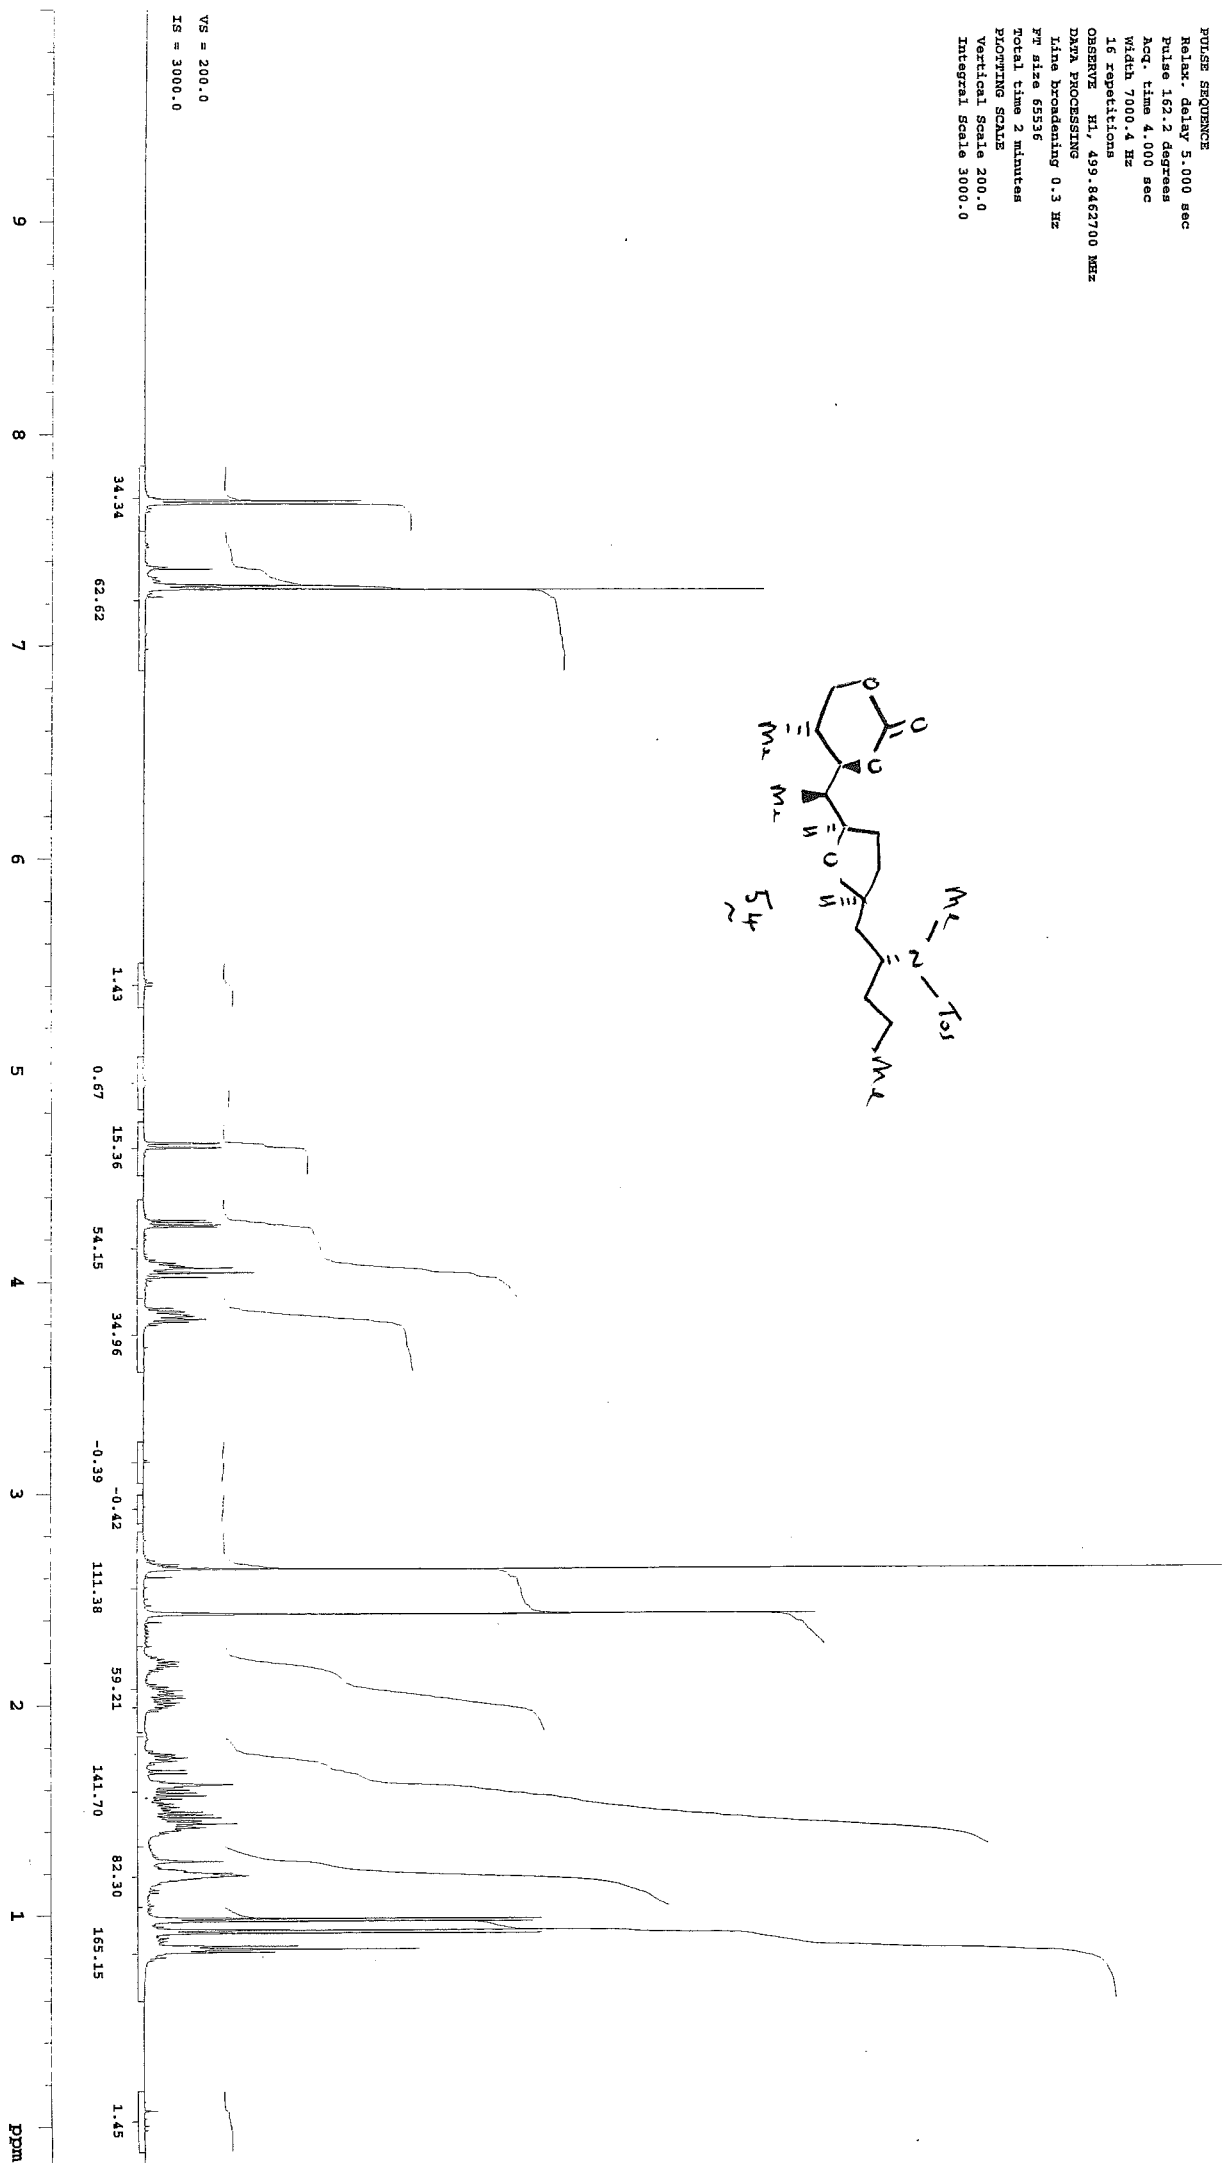

Narash Kumar  
NR-441  
cdCl<sub>3</sub>  
Dulcy 500 (TP)  
C-13 fast pulses  
Relaxor 5 mm B<sub>1</sub> probe  
11.04.00  
589c

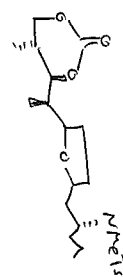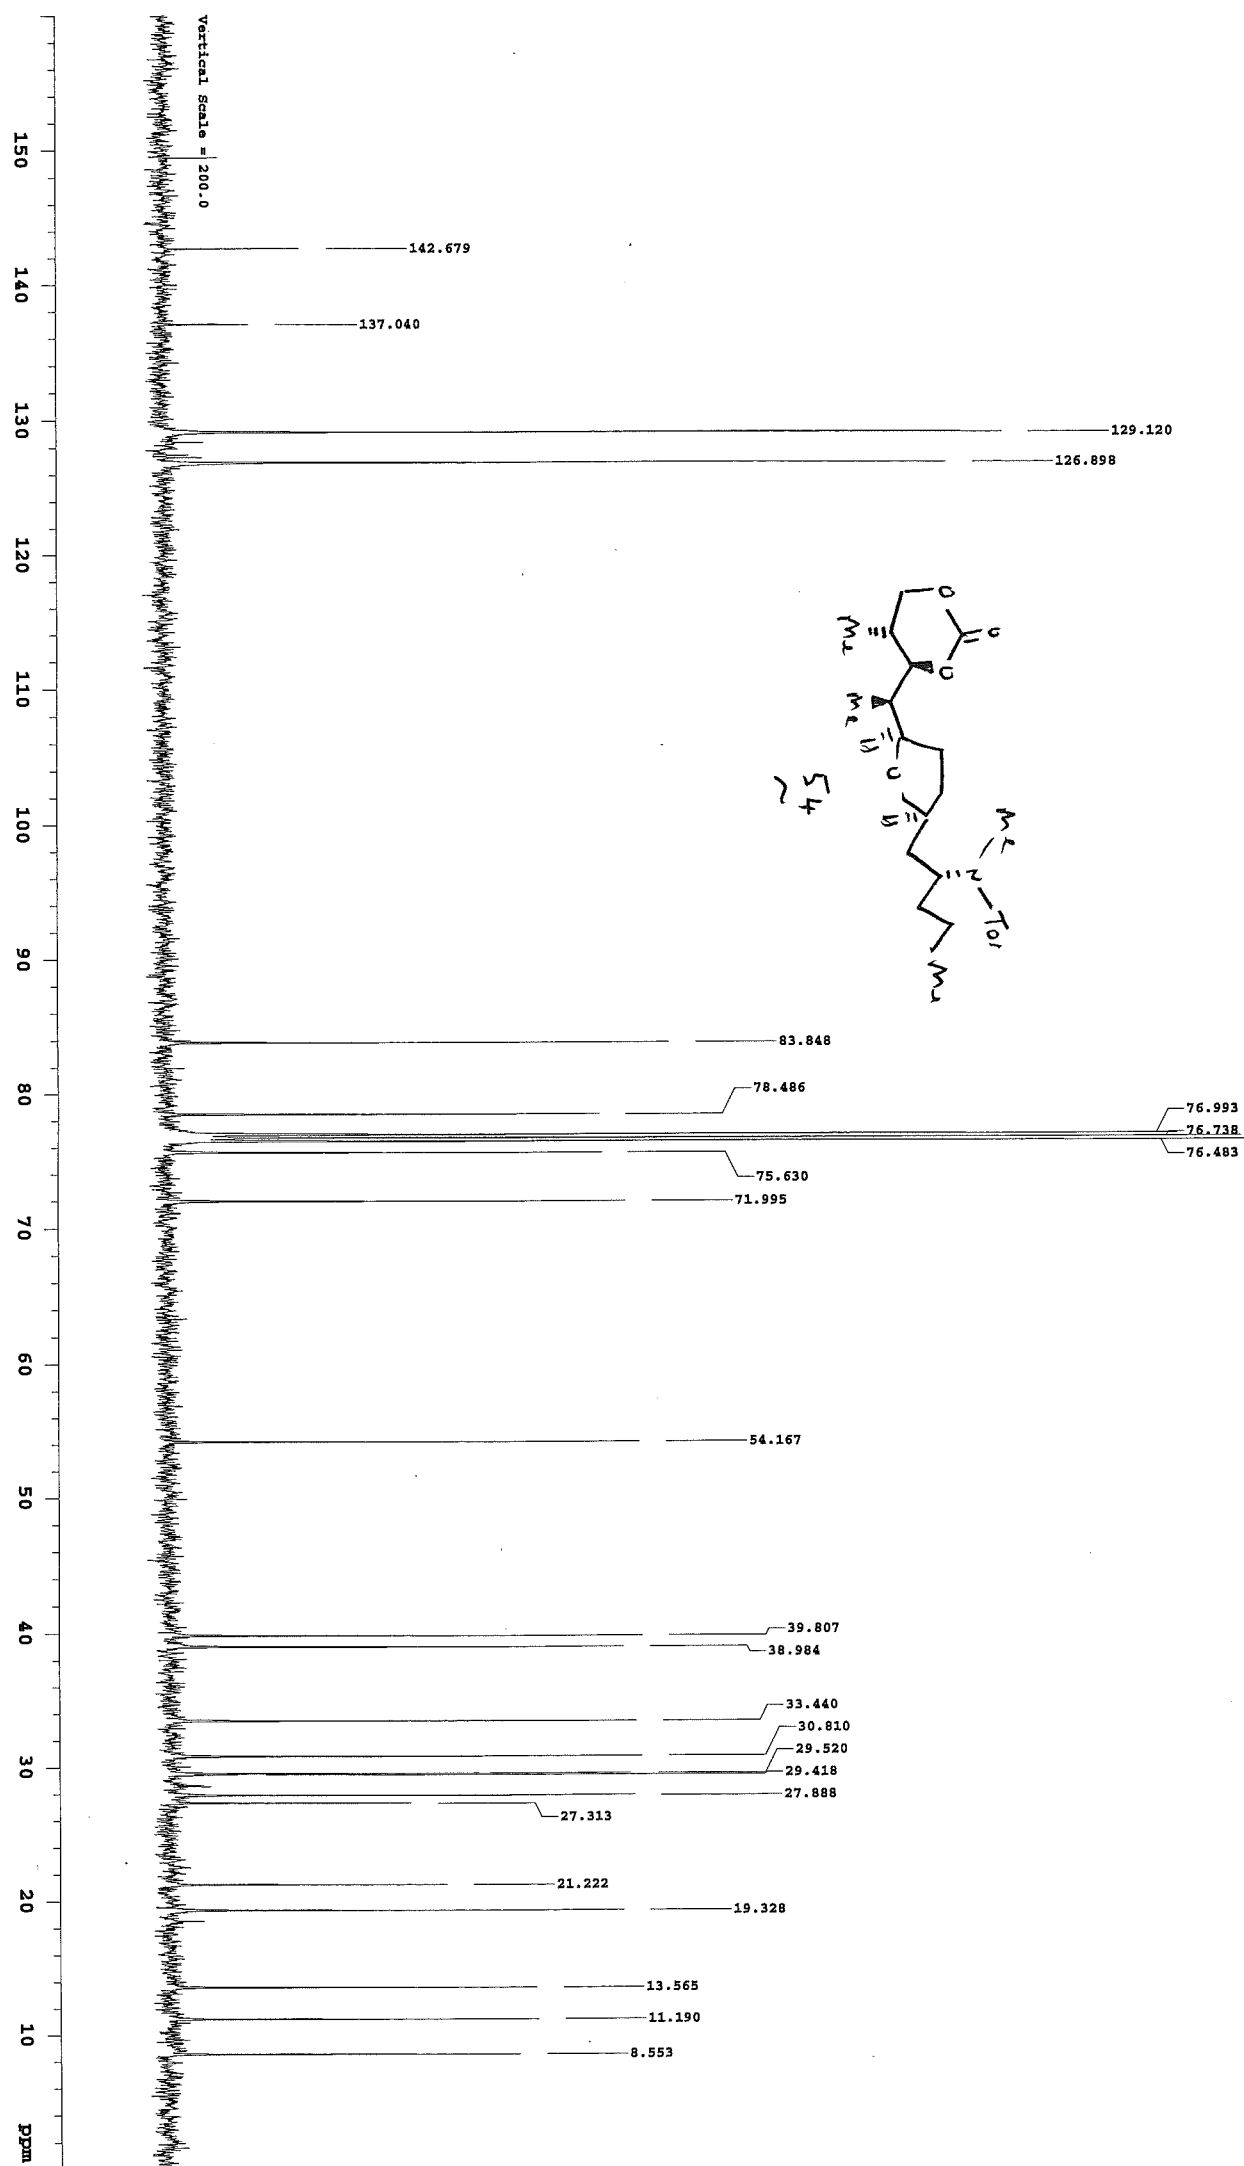

N Kumar  
NR-453  
cdcl3  
H1  
703  
5 mm PFG triple probe  
Unity 500 (Pur)  
08-05-00

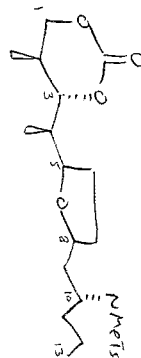

Solvent: cdcl3  
Ambient temperature  
User: 1-15-87  
File: 703  
Date May 8 00  
INOVA-300 "athos"

PULSE SEQUENCE  
Relax. delay 5.000 sec  
Pulse 101.4 degrees  
Acq. time 4.000 sec  
Width 7000.4 Hz  
16 repetitions

OBSERVE H1, 499.8462703 MHz  
DATA PROCESSING  
Line broadening 0.3 Hz  
F2 size 65536  
Total time 2 minutes  
Flipping SCALE  
Vertical Scale 200.0  
Integral Scale 3000.0

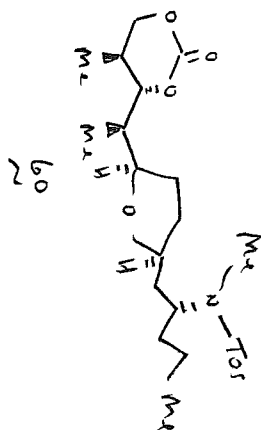

Spectrum Number = 1.0  
Vertical Scale = 200.0  
Integral Scale = 3000.0

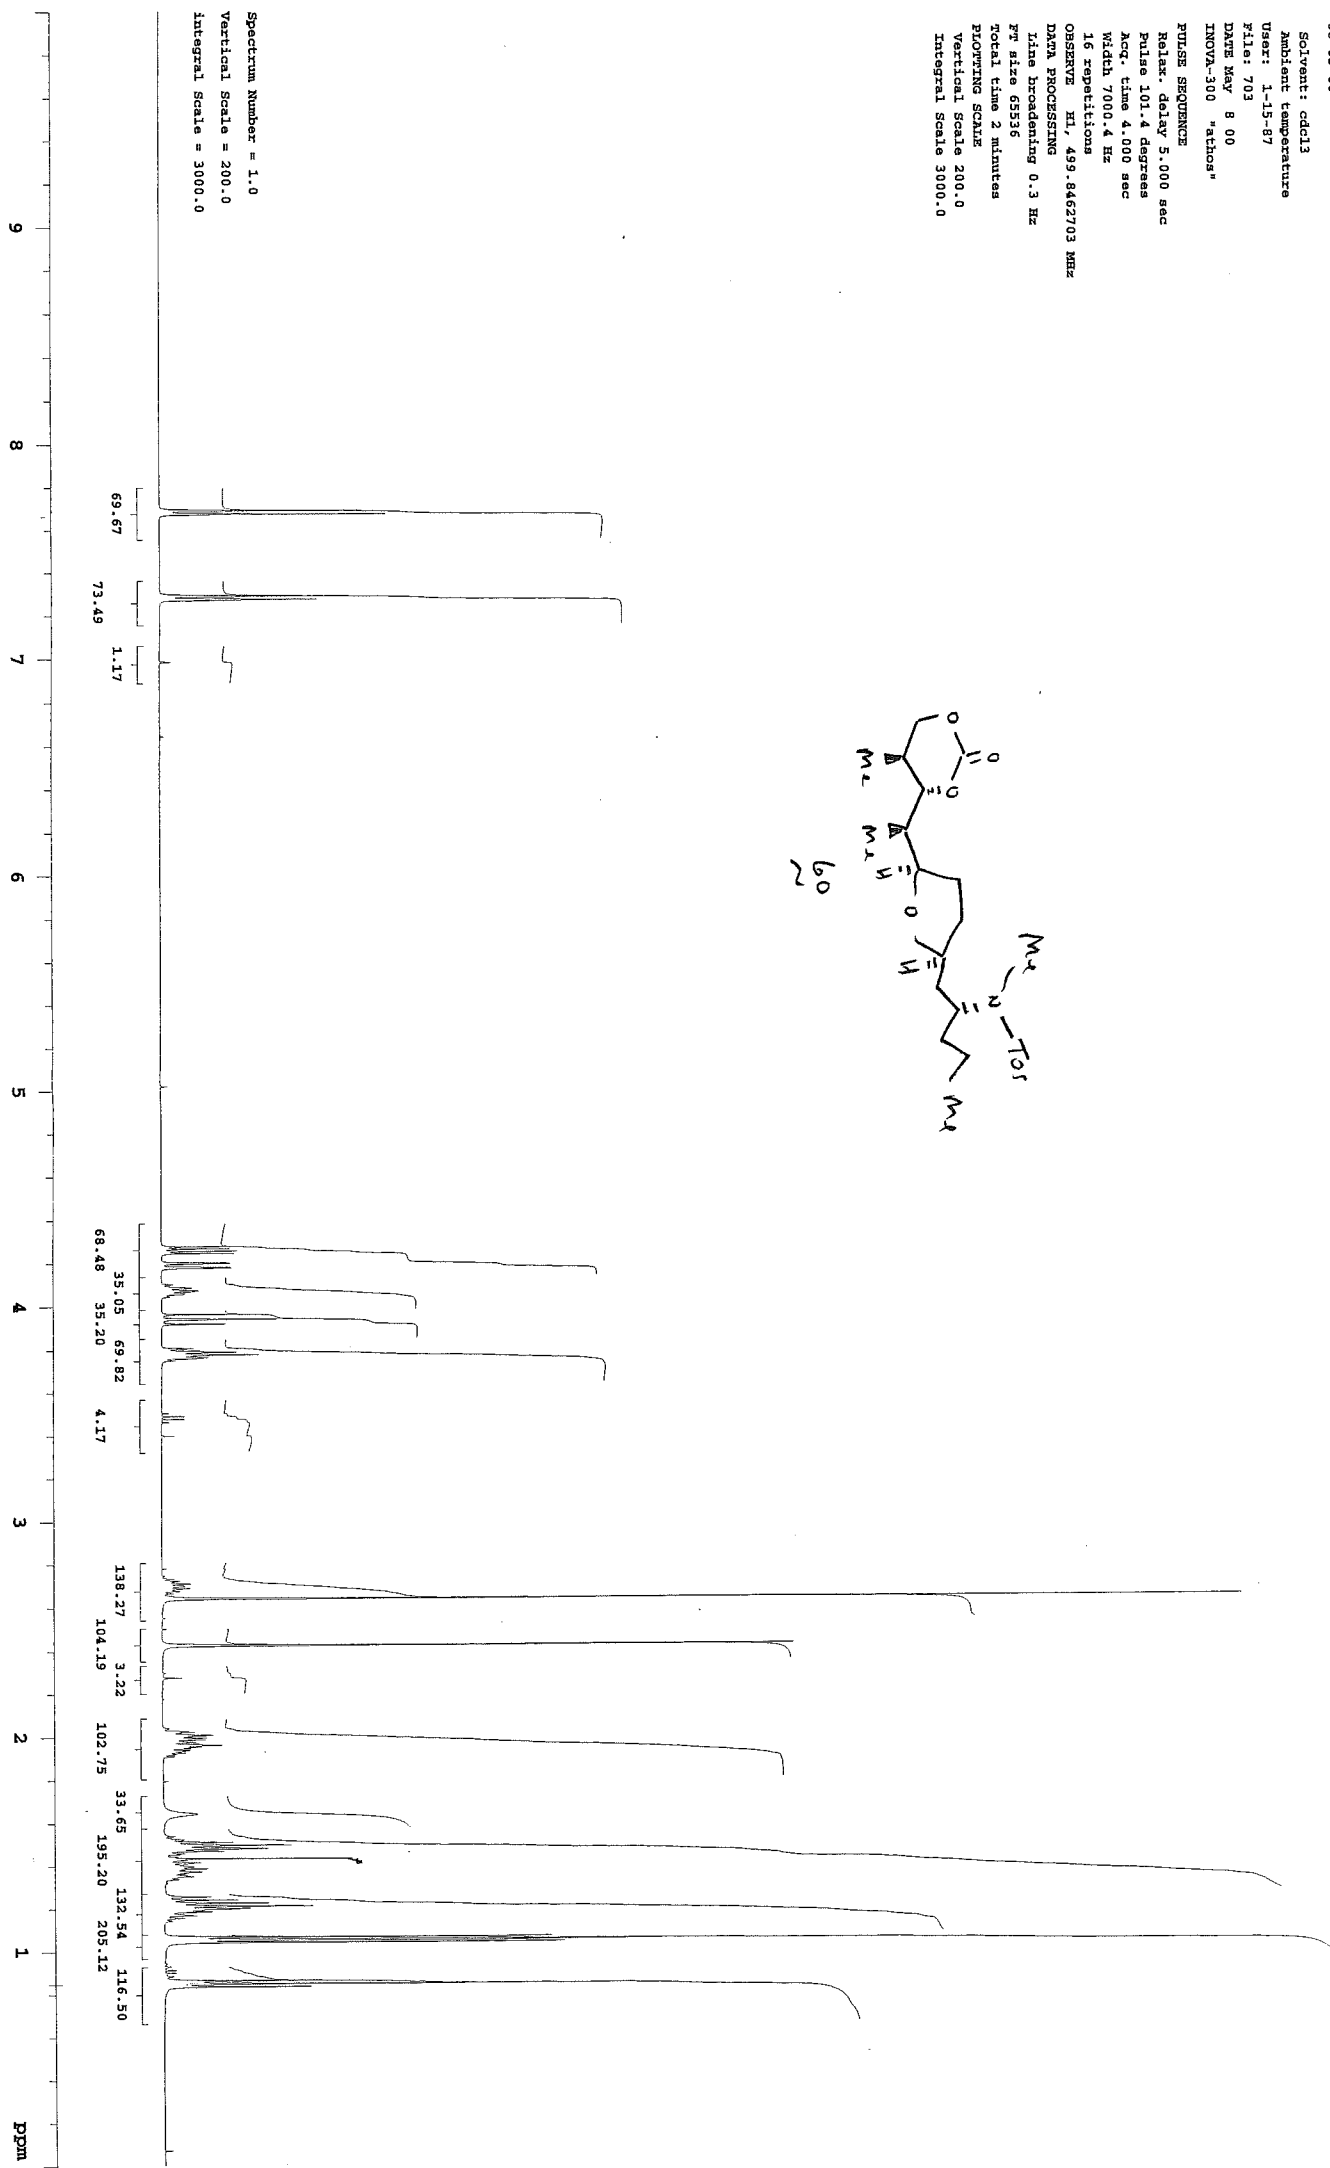

N Kumar  
NR-453  
cdcl3  
703c  
5mm pfg triple probe  
Daly 500 (PJK)  
08-05-00

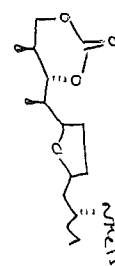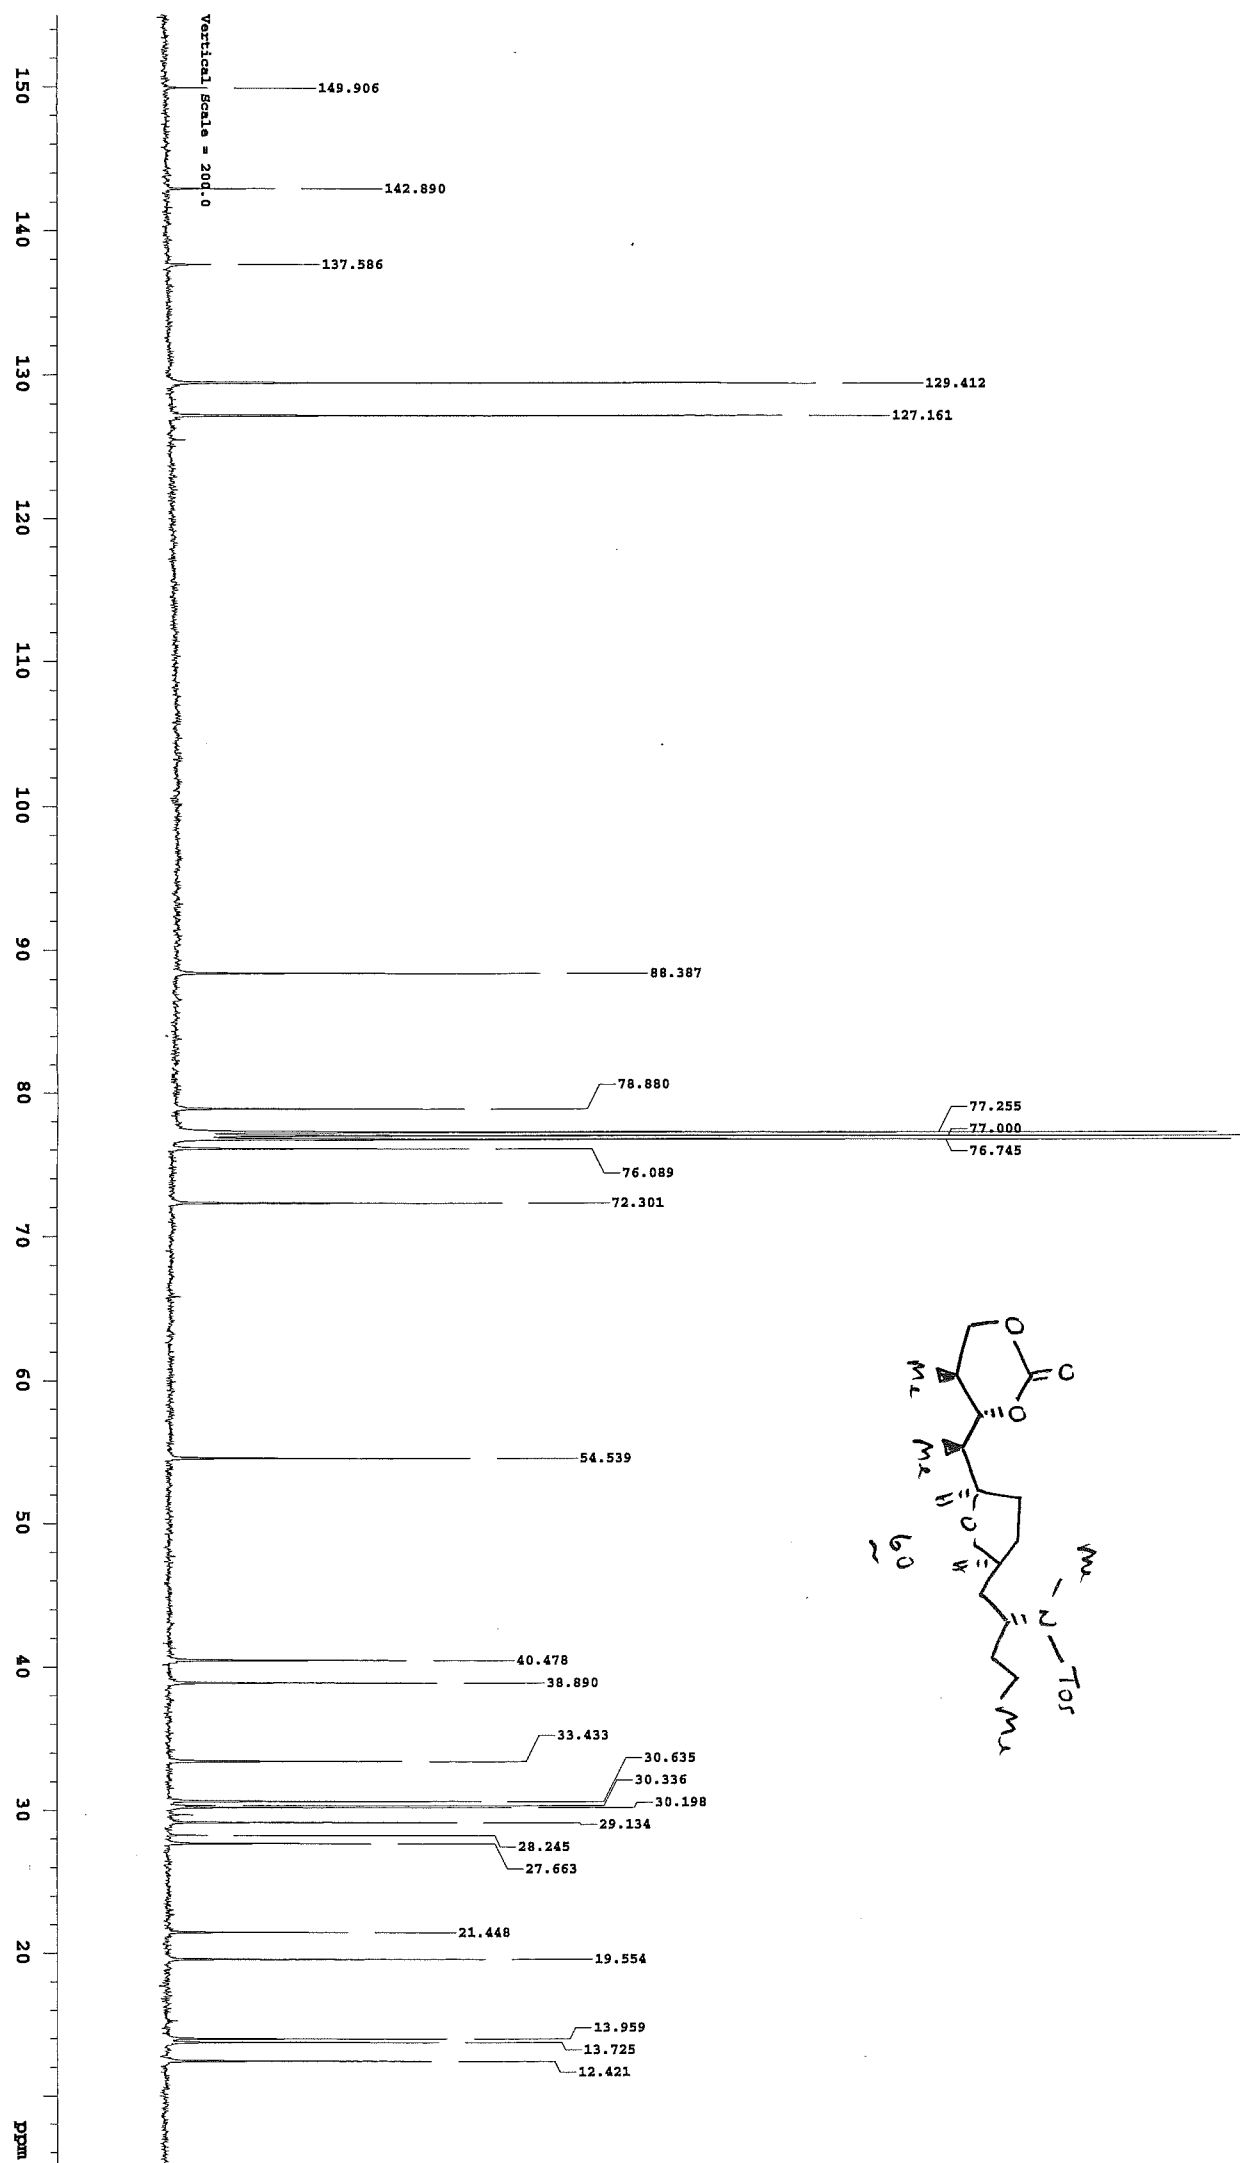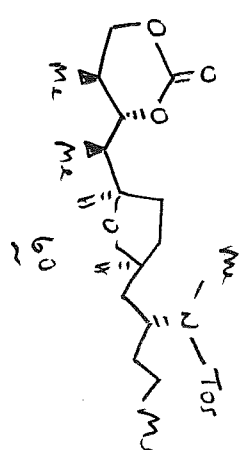

N Kumar  
NR-466  
cdcl3  
H1  
785  
5 mm PFG triple probe  
Unity 500(PTK)  
06-06-00

Solvent: cdcl3  
Ambient temperature  
User: 1-15-87  
File: 785  
Date Jun 6 00  
INOVA-300 "athos"

PULSE SEQUENCE  
Relax. delay 5.000 sec  
Pulse 101.4 degrees  
Acq. time 4.000 sec  
Width 7000.4 Hz  
16 repetitions

OBSERVE H1, 499.8462700 MHz  
DATA PROCESSING  
Line broadening 0.3 Hz  
F2 size 65536  
Total time 2 minutes  
PROPPING SCHEM  
Vertical Scale 200.0  
Integral Scale 1000.0

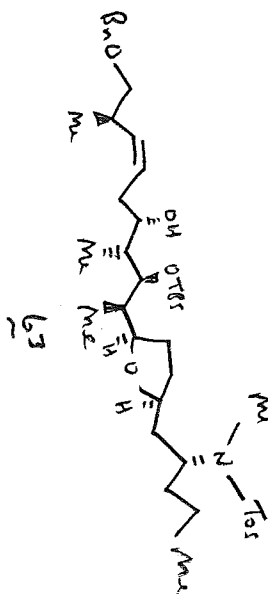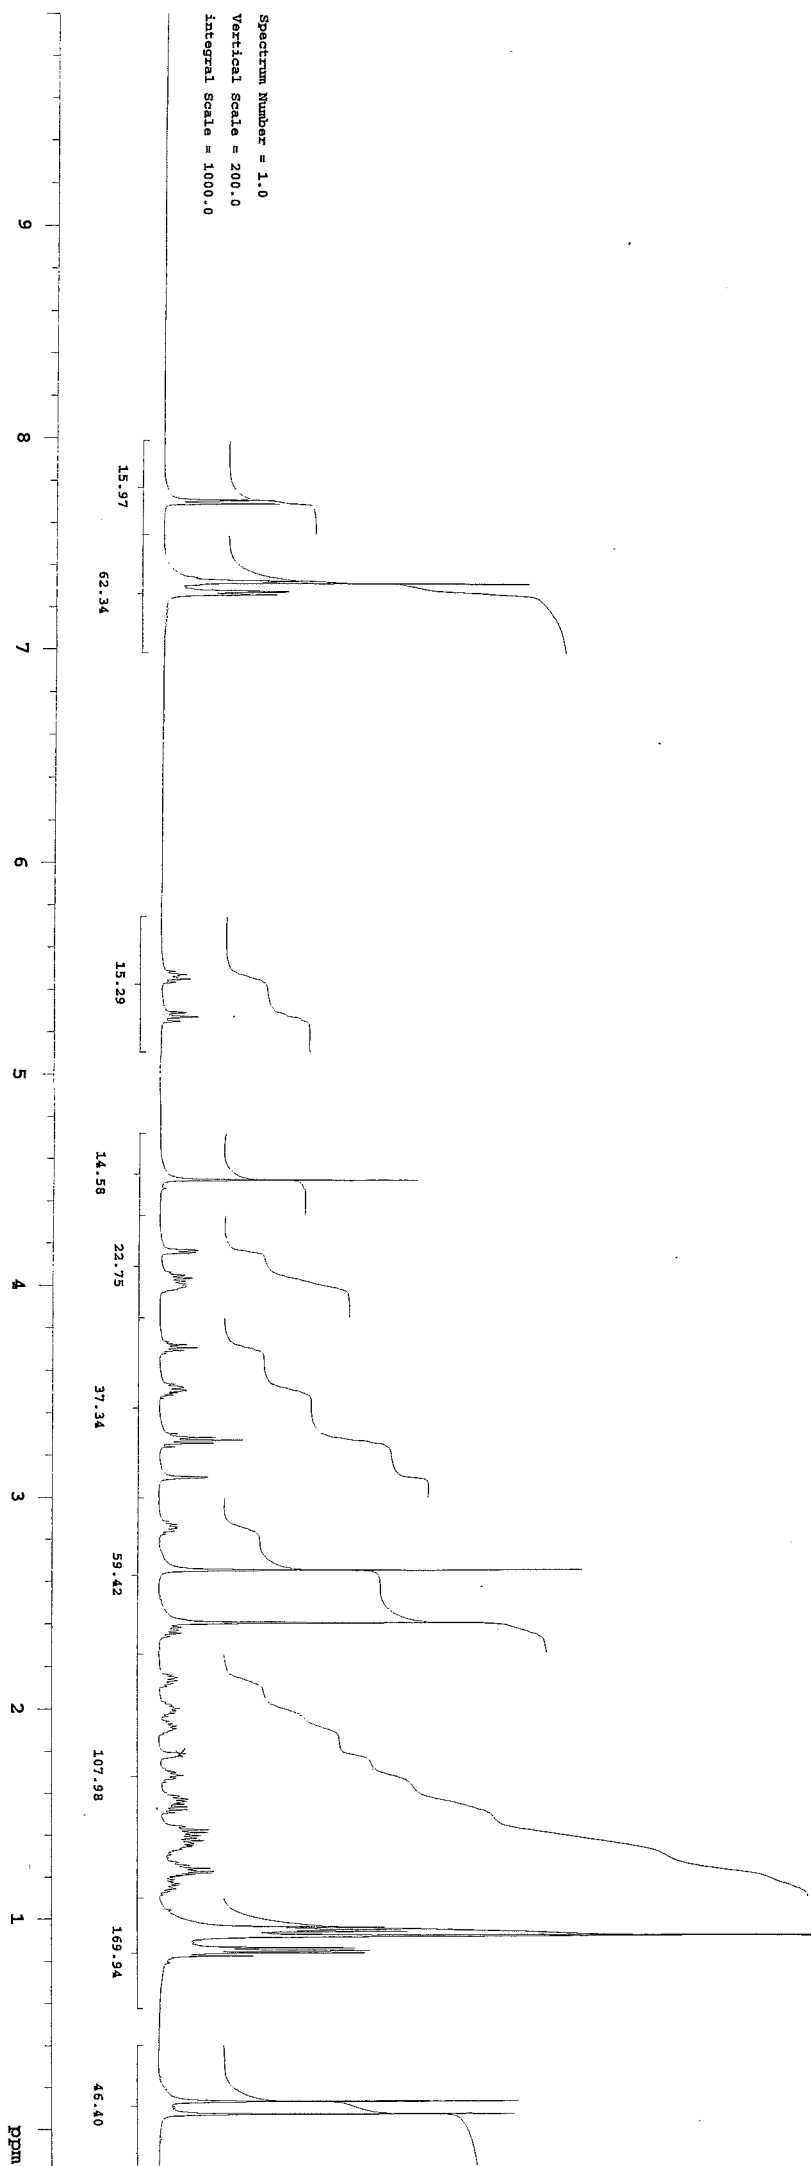

rs-411  
13C OBSERVE  
Solvent: CDCl3  
Ambient temperature  
Sample #4  
File: 401  
Queue name Decilia  
Date Dec 11 99  
INOVA-300 "athos"  
PULSE SEQUENCE  
Pulse 45.0 degrees  
Acq. time 1.639 sec  
Width 20000.0 Hz  
4096 repetitions  
OBSERVE CH3, 75.3963141 MHz  
DECOUPLE H1, 239.8473785 MHz  
Power 40 dB  
continuously on  
VAPOR-16 modulated  
DATA PROCESSING  
Line broadening 1.0 Hz  
FM size 65536  
Total time 111 minutes

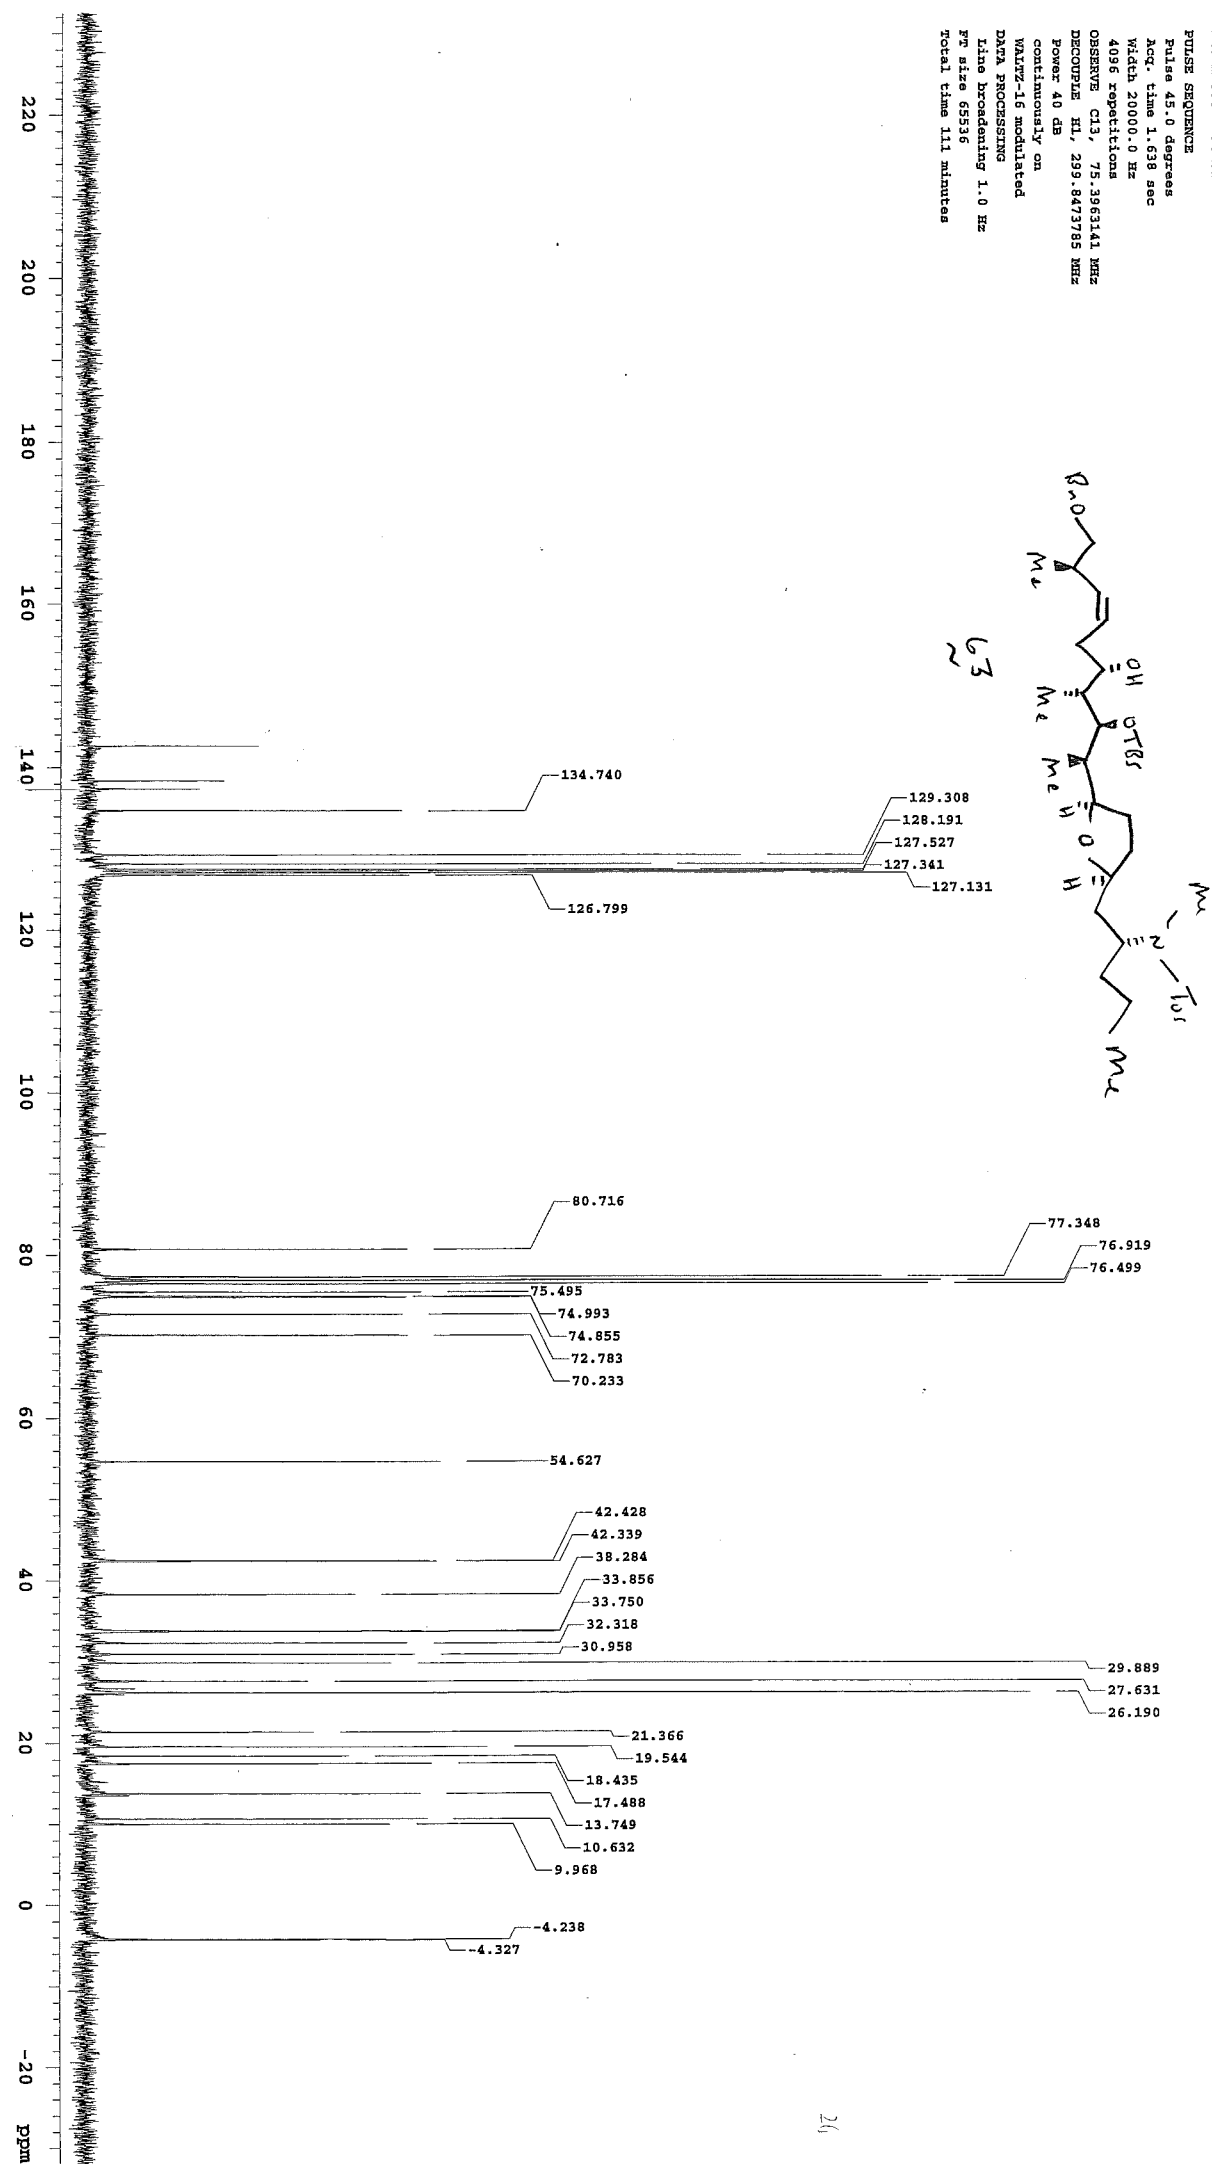

Nareesh Kumar  
NR-492 II

CDCl<sub>3</sub>  
Unity500 (TP)  
Standard H-1 parameters  
5 mm PFG triple probe  
18.08.00  
118

Solvent: cdcl<sub>3</sub>  
Ambient temperature

User: 1-15-87  
File: 118  
Date Acq 18 00  
INOVA-300 "athos"

PULSE SEQUENCE  
Relax. delay 5.000 sec

Pulse 101.4 degrees  
Acq. time 4.000 sec  
Width 7000.4 Hz

16 repetitions  
OBSERVE H1, 499.8462700 MHz

DATA PROCESSING  
Line broadening 0.3 Hz  
F2 size 65536  
Total time 2 minutes

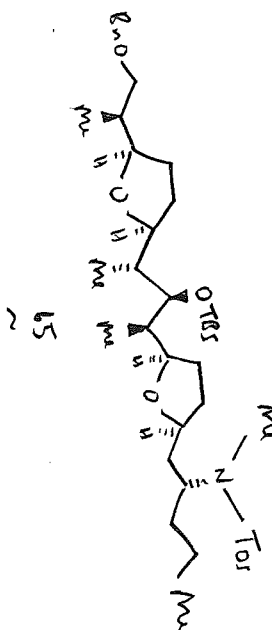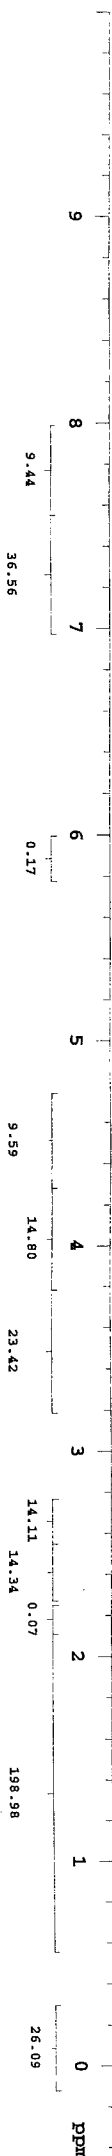

Narresh Kumar  
MR-492 II  
cdCl3  
Unity 500 (TP)  
Machixac 5 mm BB probe  
18-08-00  
118c  
Solvent: cdCl3  
Ambient temperature  
User: 1-15-87  
File: 118  
Date Aug 18 00  
INOVA-300 "athos"  
PULSE SEQUENCE  
Pulse 54.0 degrees  
Acq. time 1.092 sec  
Width 30007.5 Hz  
52801 repetitions  
OBSERVE C13, 125.6864381 MHz  
DECouple H1, 499.8480247 MHz  
Power 37 dB  
continuously on  
WALTZ-16 modulated  
DATA PROCESSING  
Line broadening 3.0 Hz  
F1 size 65536  
Total time 16.0 hours

28c

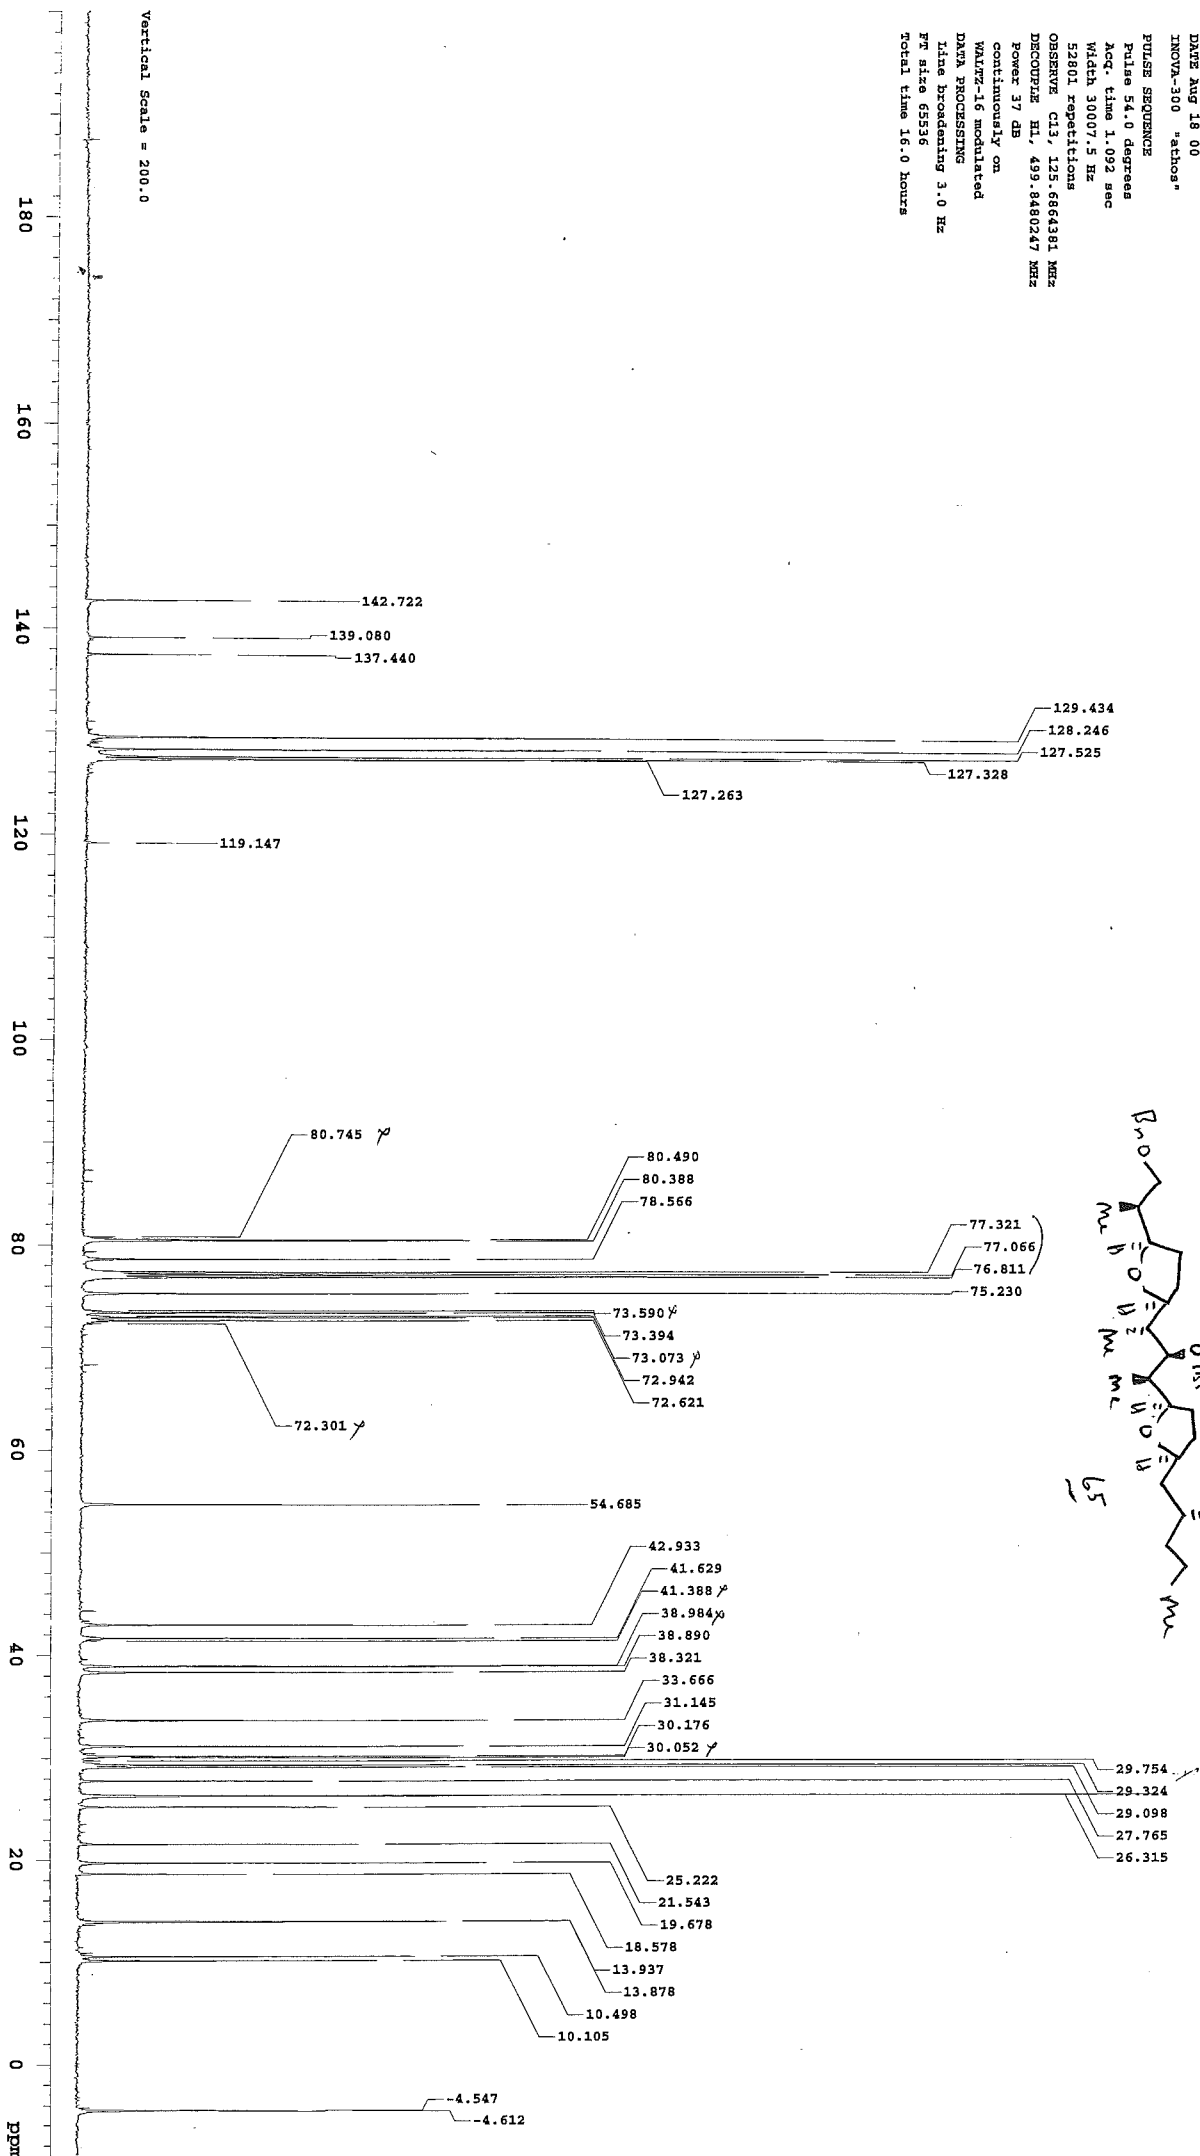



Chris Moore  
CGM01/078  
CDCl3  
Unity 500 (ZF)  
Standard H-1 parameters  
5 mm PFG triple probe  
18.12.02  
1202016  
Solvent: cdcl3  
Ambient temperature  
User: 1-15-87  
File: 1202016  
Date Dec 18 2002  
INOVA-300 "solid4"  
PULSER SEQUENCE  
Relax. delay 5.000 sec  
Pulse 105.4 degrees  
Acq. time 2.340 sec  
Width 7000.4 Hz  
16 repetitions  
OBSERVE H1, 499.8462718 MHz  
DATA PROCESSING  
Line broadening 0.3 Hz  
F2 size 65536  
Total time 1 minutes

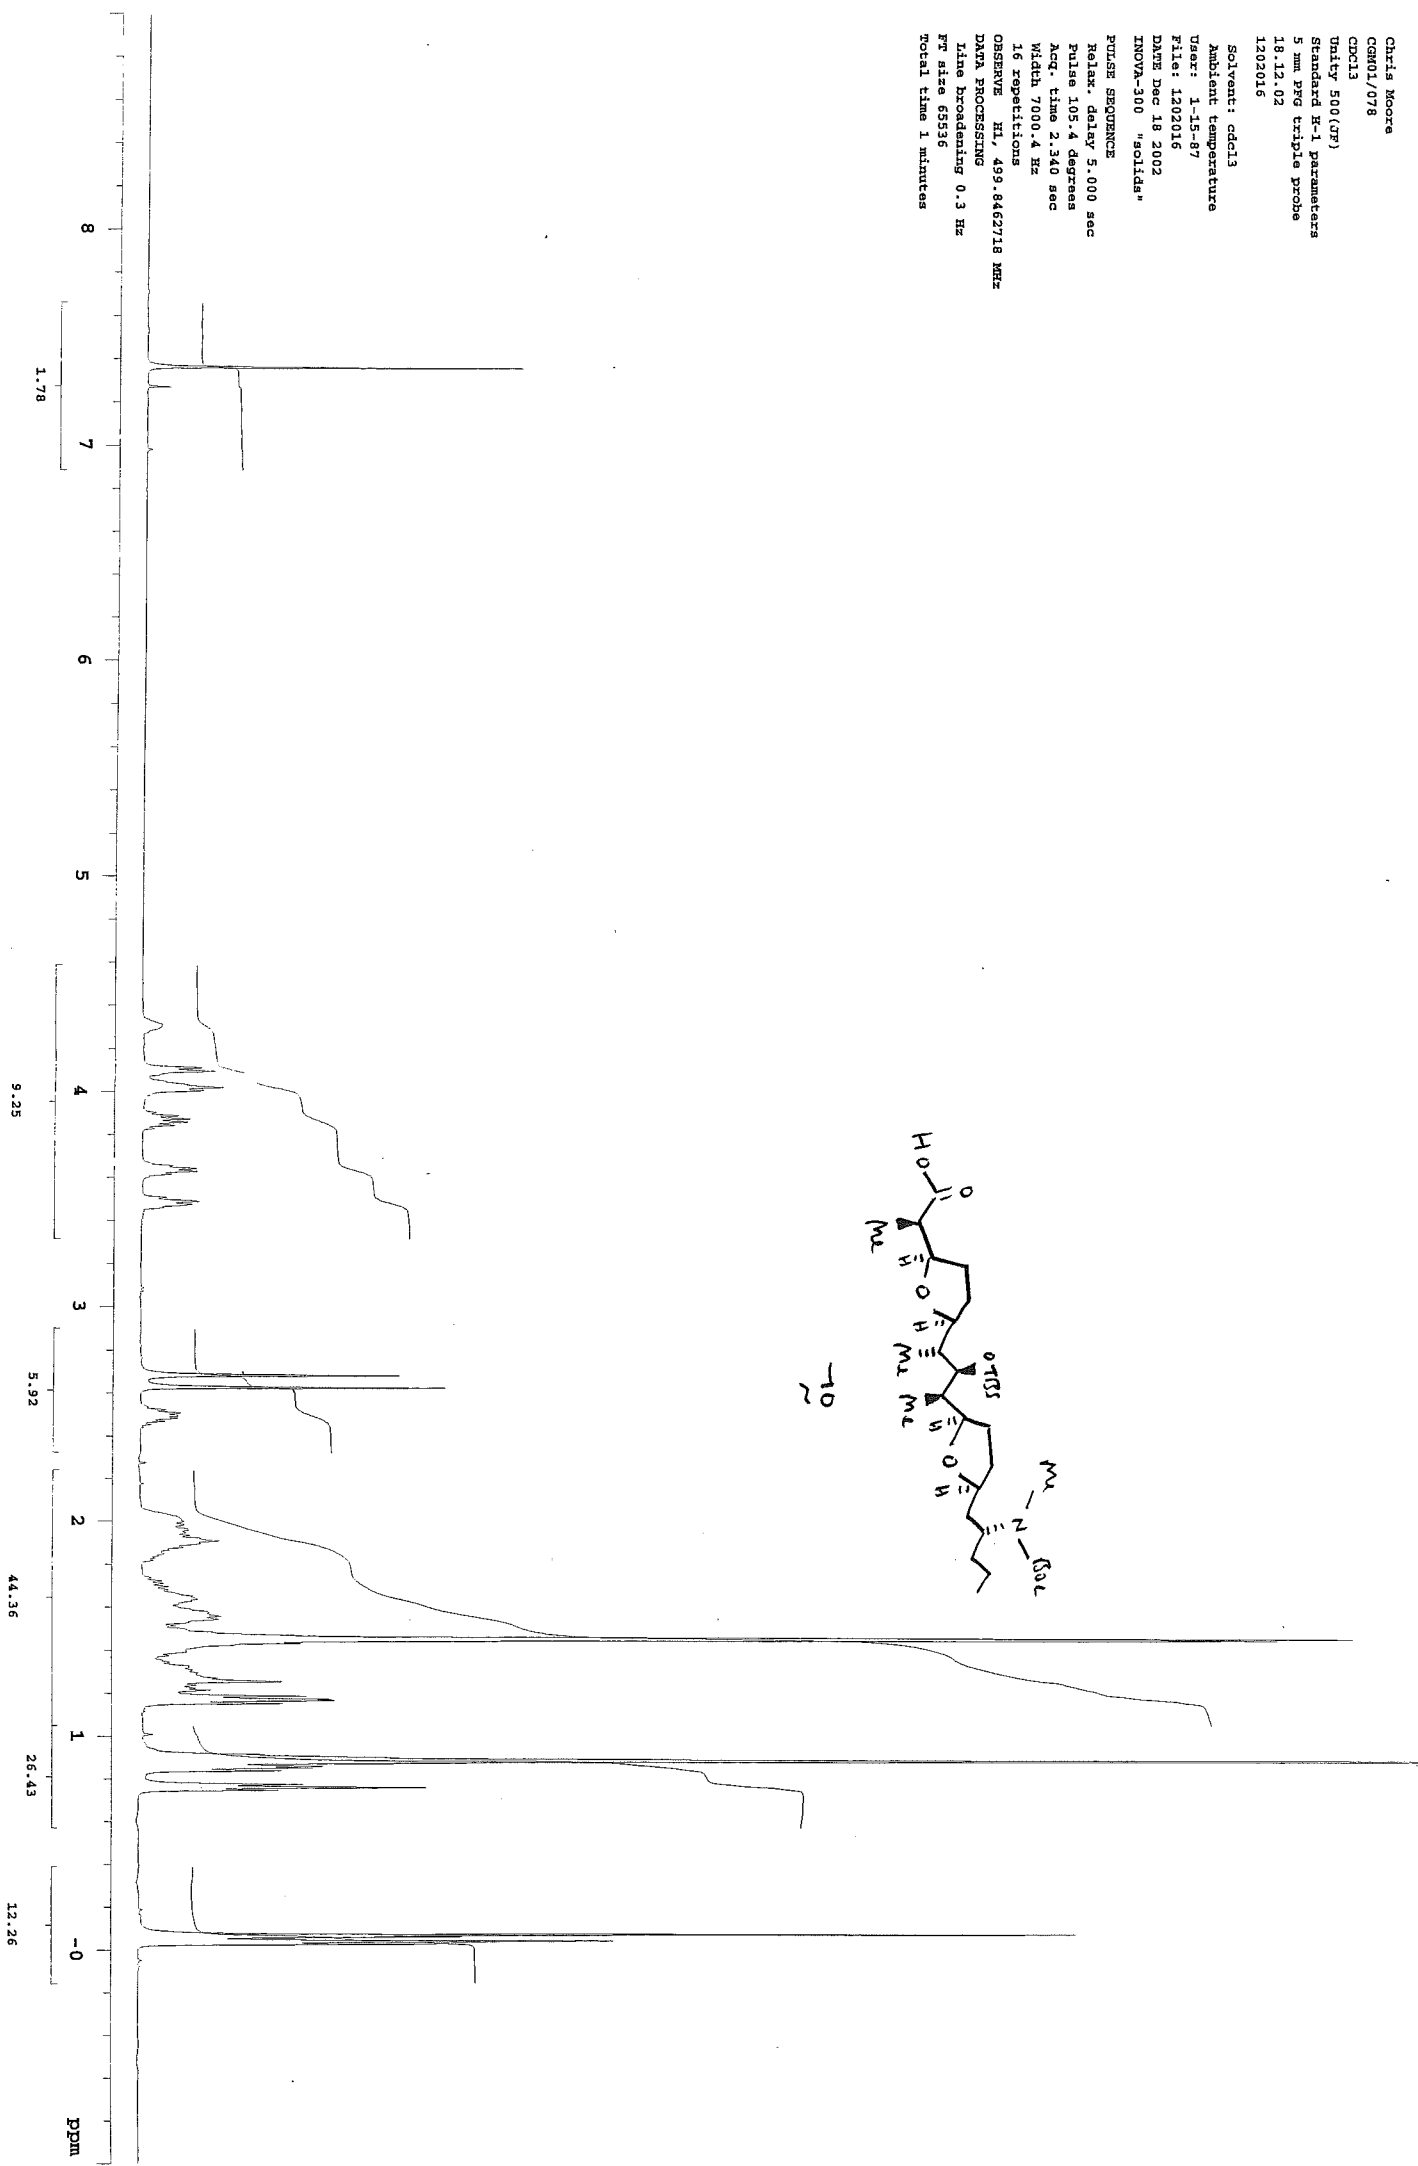

O Germany  
06266  
cdcl3  
Inova 400 (RS)  
Aranda  
Proton 400MHz  
14.12.99  
1/3

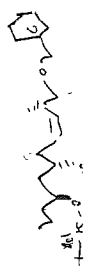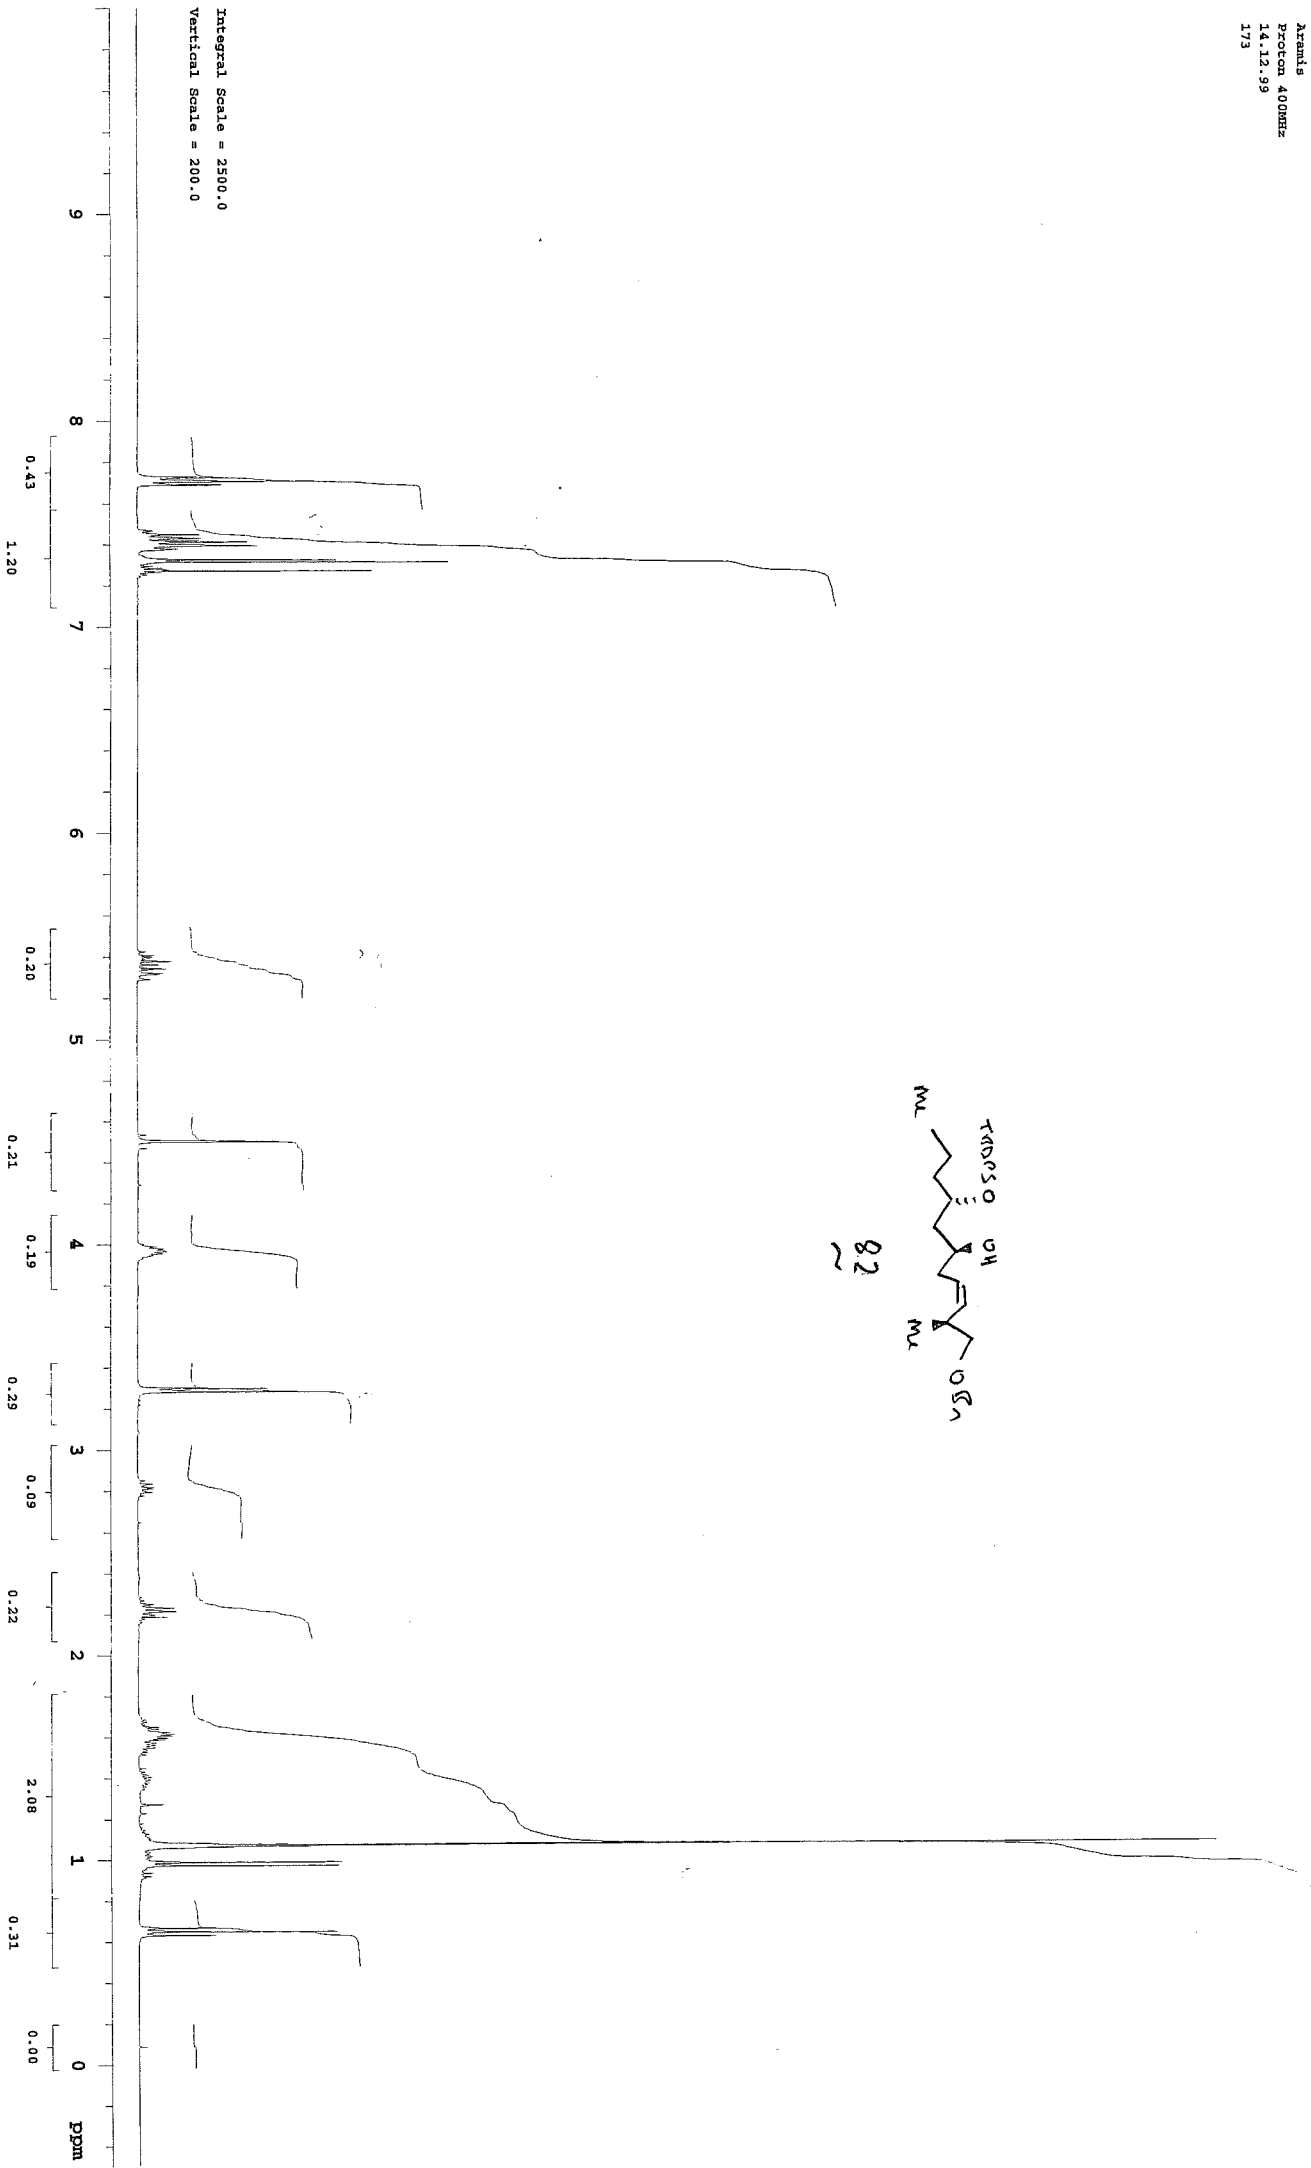

Integral Scale = 2500.0  
Vertical Scale = 200.0

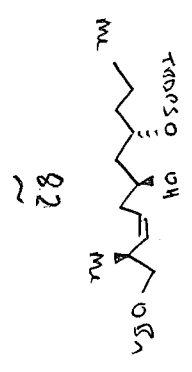

82

O Germany  
06256  
CDCl<sub>3</sub>  
Inova 400 (RS)  
Aranda  
13C 100MHz  
23.12.99  
173c

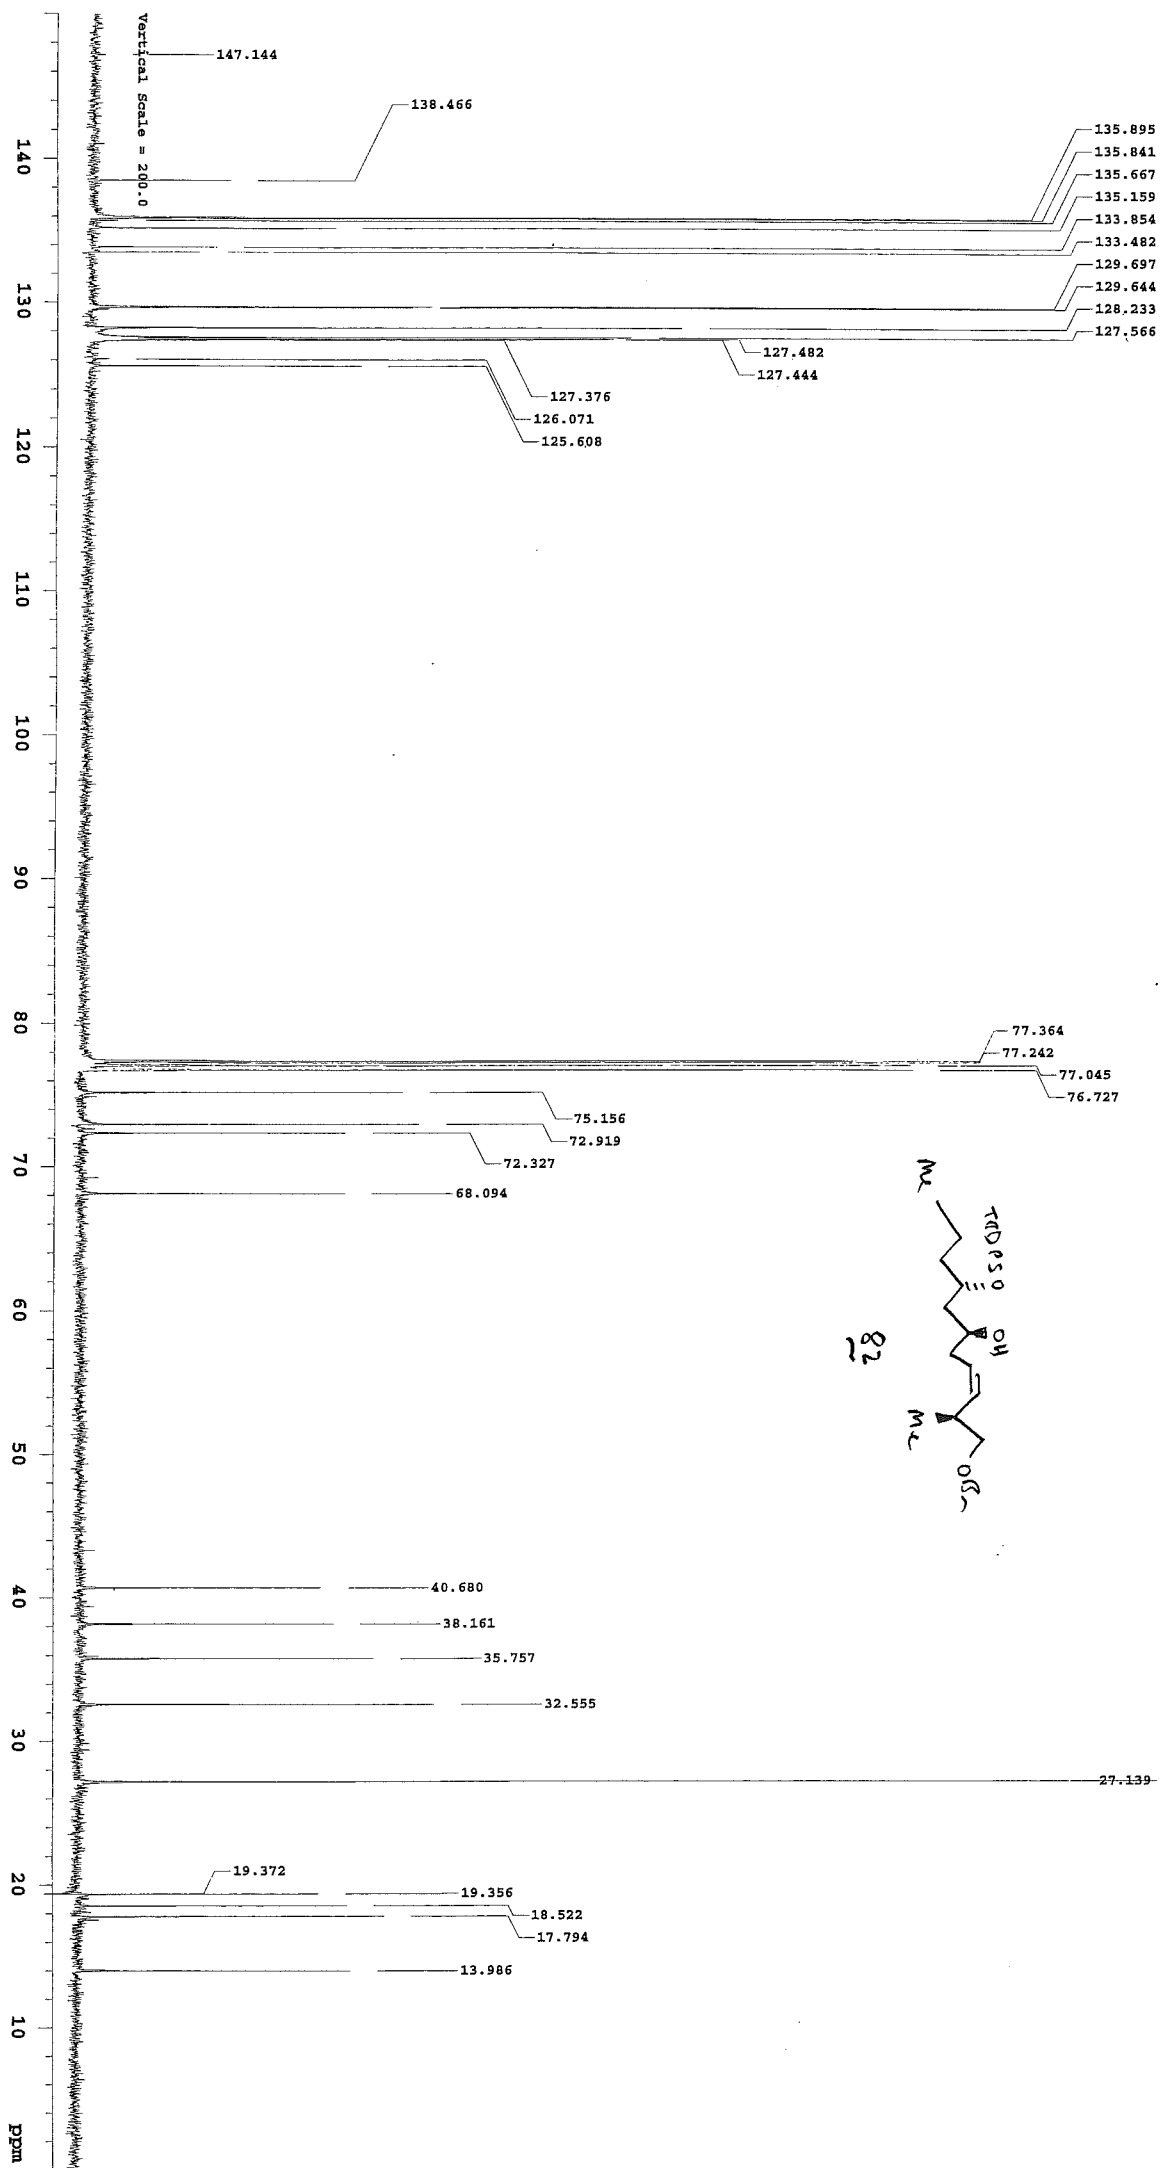

O Germany  
06717  
cdcl3  
INOVA 400 (RS)  
Aramis  
Proton 400MHz  
30.04.01  
162

Pulse Sequence: s2pul  
Solvent: cdcl3  
Ambient temperature  
User: 1-12-87  
P1: 162-30-04-CG-RS  
INOVA-400 "aramis"  
PULSE SEQUENCE  
Relax. delay 5.000 sec  
Pulse 36.0 degrees  
Acq. time 3.994 sec  
Width 4406.3 Hz  
16 repetitions  
OBSERVE H1, 399.9584367 MHz  
DATA PROCESSING  
Line Broadening 0.2 Hz  
FM size 65136  
Total time 2 min, 24 sec

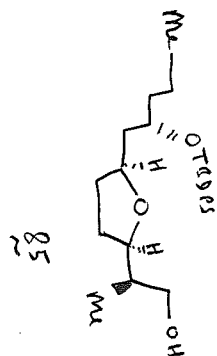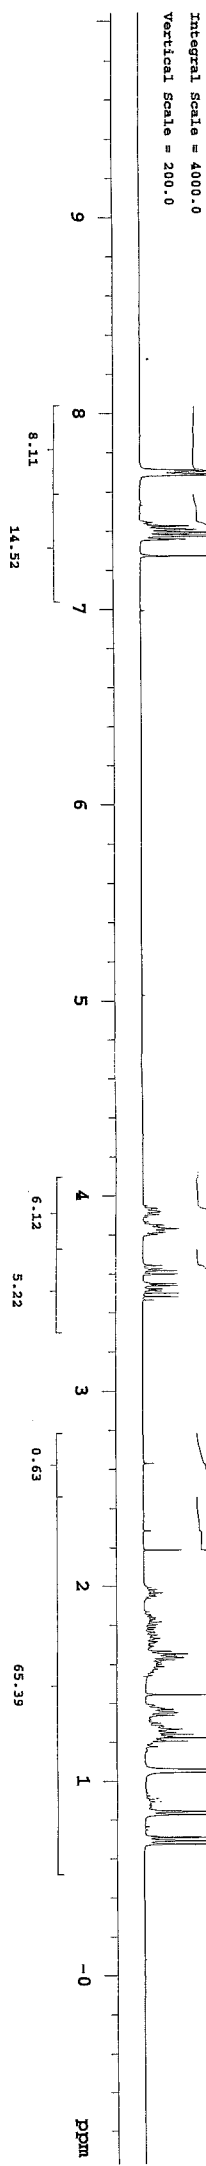

O Germany  
06717  
cdcl3  
Inova 400(NR)  
Aramis  
13C 100MHz  
30.04.01  
162c

Pulse Sequence: zgpg30

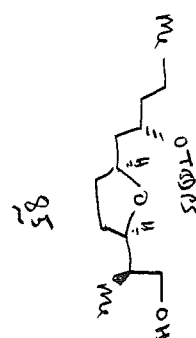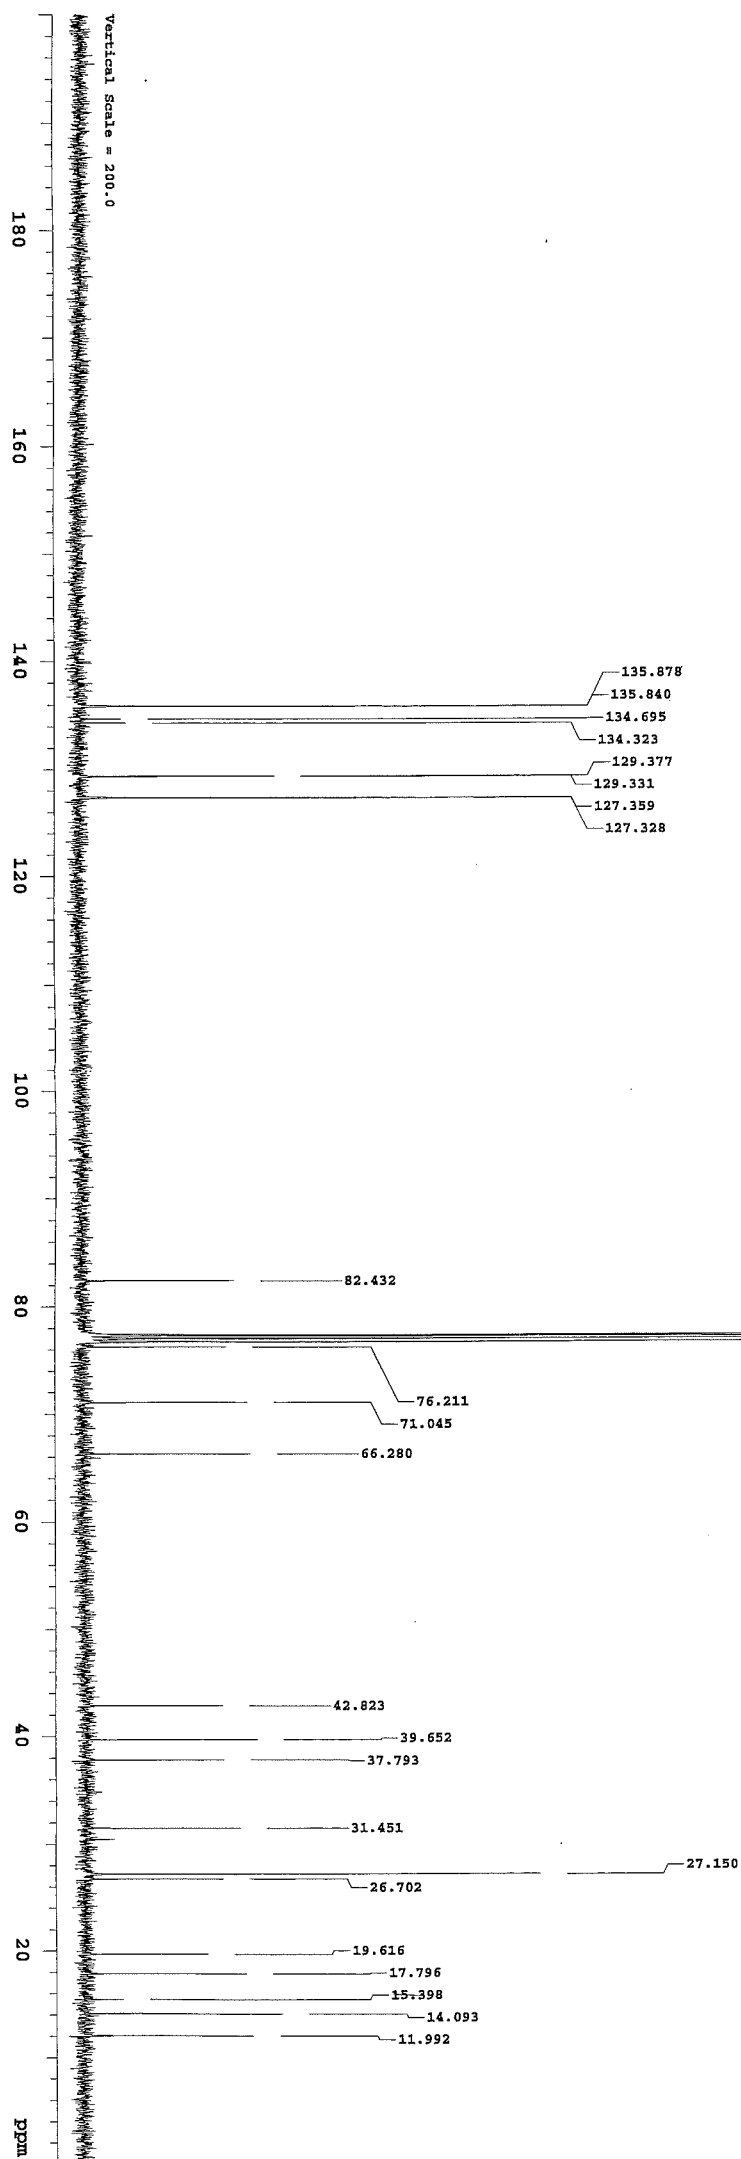

0 Germany  
06819  
cdcl3  
Inova 400(RS)  
Armin  
Proton 400MHz  
25.07.01  
522

Pulse Sequence: zgpg30

Solvent: cdcl3  
Ambient temperature  
User: 1-13-87  
File: 522-25-07-06-RS  
INOVA-400 "Armin's"

PULSE SEQUENCE

Relax. delay 5.000 sec  
Pulse 36.0 degrees  
Acq. time 4.005 sec  
Width 4001.6 Hz  
16 repetitions  
OBSERVE H1, 399.9564362 MHz  
DATA PROCESSING  
Line Broadening 0.2 Hz  
F2 size 65536  
Total time 2 min, 24 sec

Integral Scale = 45000.0  
Vertical Scale = 200.0

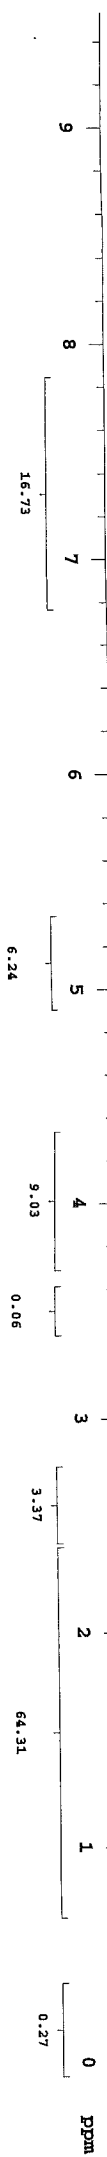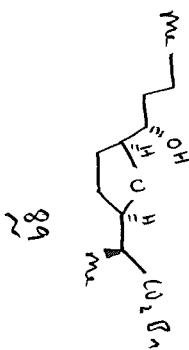

O Germany  
OG819  
cdcl3  
INOVA 400 (RS)  
Aramis  
13C 100MHZ  
26.07.01  
522c

Pulse Sequence: zgpg30  
Solvent: cdcl3  
Ambient temperature  
File: 522c-26-07-09-RS  
INOVA-400 "aramis"

PULSE SEQUENCE  
Pulse 36.0 degrees  
Acq. time 1.311 sec  
Width 25000.0 Hz  
10433 repetitions  
OBSERVE CH3, 100.5695308 MHz  
DECOUPLE H1, 399.9597749 MHz  
Power 38 dB  
continuously on  
WALTZ-16 modulated  
DATA PROCESSING  
Line broadening 1.0 Hz  
FR size 65536  
Total time 36 hr, 39 min, 15 sec

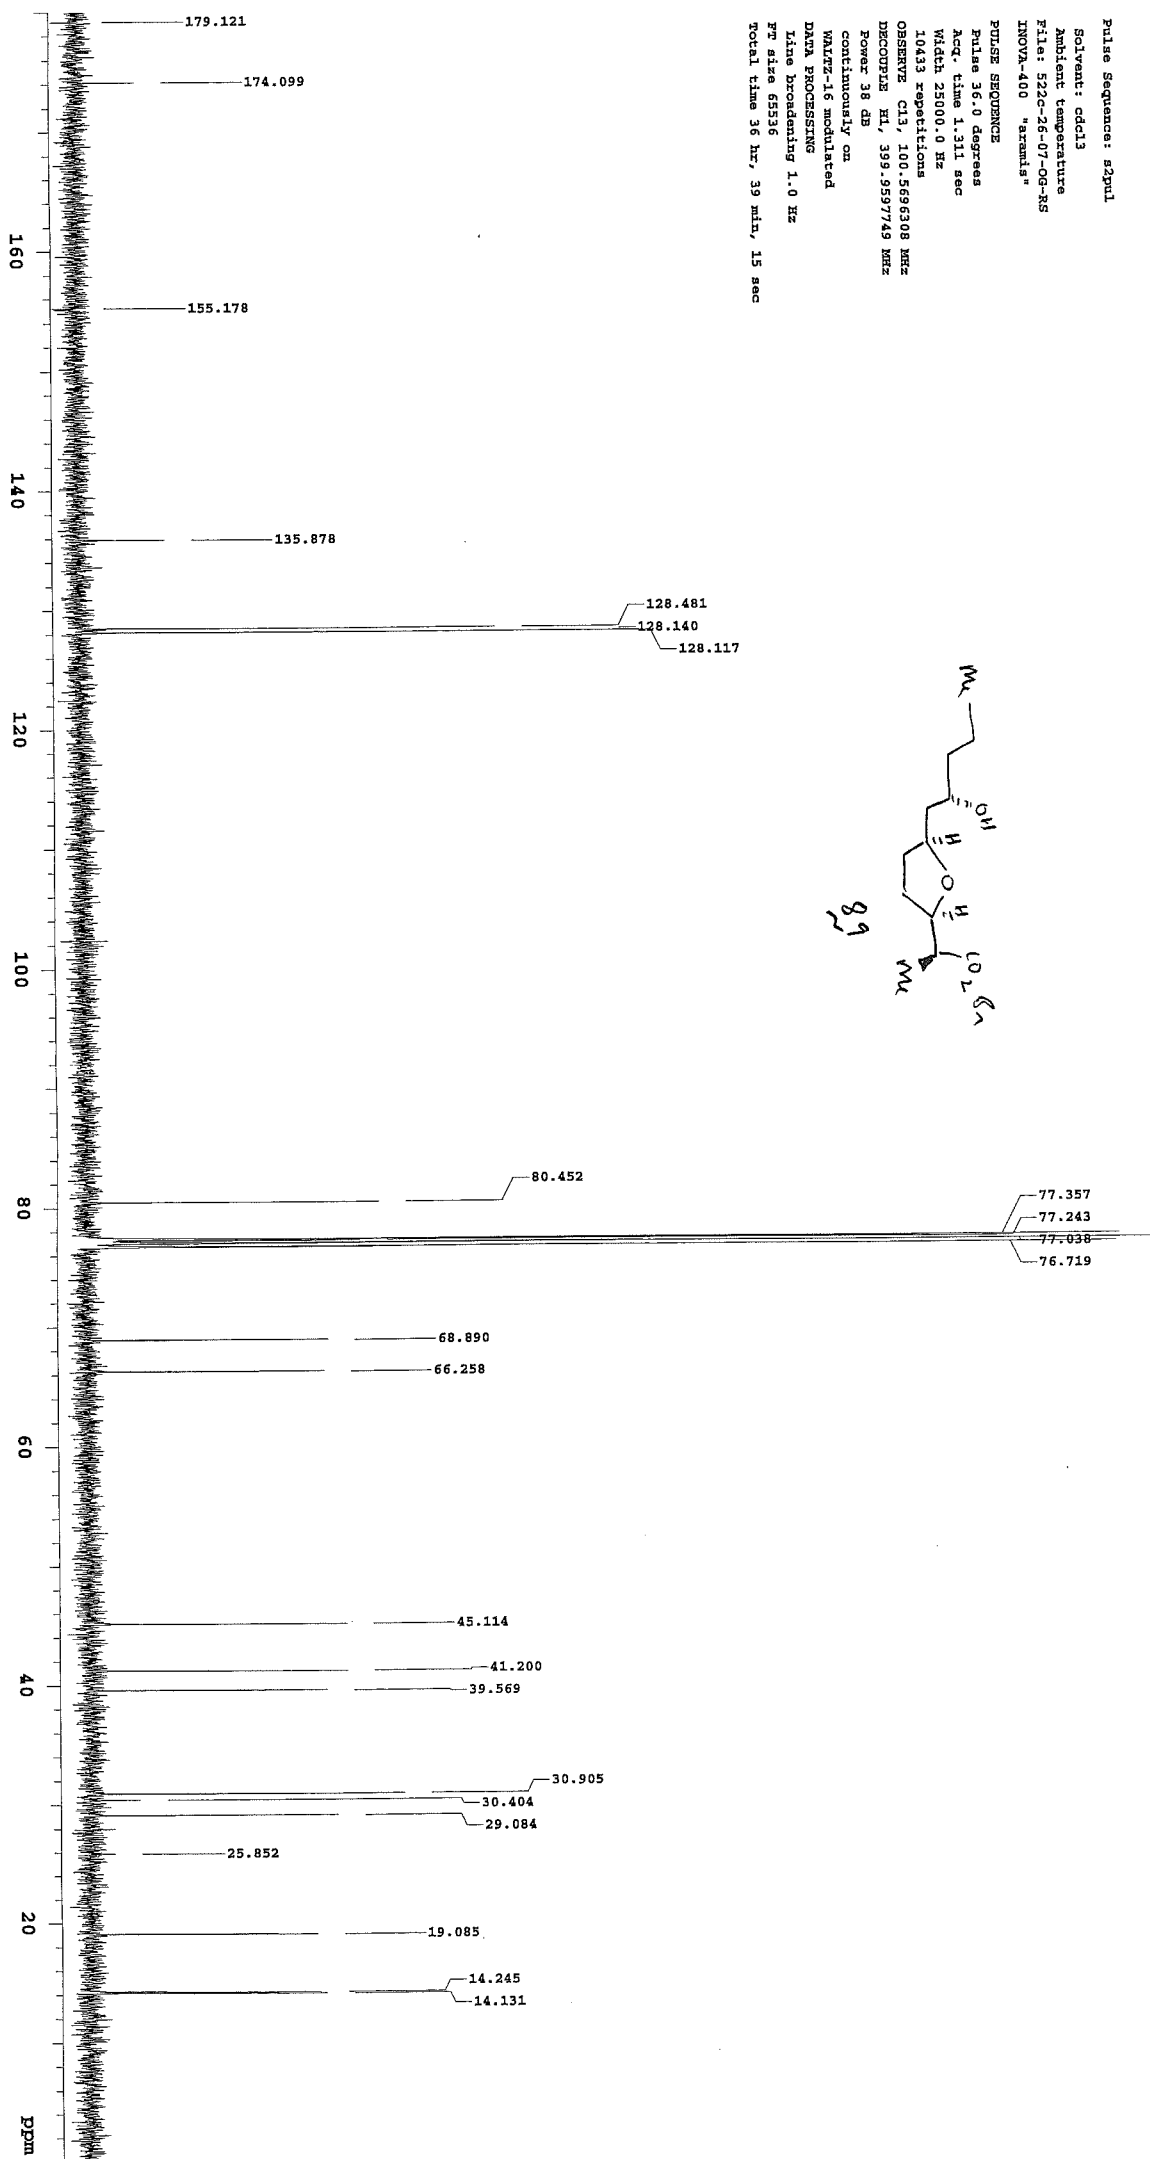

Chris Moore  
CGM01/081  
CDCl3  
Unity 500(JF)  
Standard H-1 parameters  
5 mm Fps triple probe  
19.12.02  
1202017  
Solvent: cdcl3  
Ambient temperature  
User: 1-15-87  
File: 1202017  
DATE Dec 19 2002  
INOVA-300 "solids"  
PULSE SEQUENCE  
Relax. delay 5.000 sec  
Pulse 105.4 degrees  
Acq. time 2.340 sec  
Width 7000.4 Hz  
16 repetitions  
OBSERVE HI, 499.8462716 MHz  
DATA PROCESSING  
Line broadening 0.3 Hz  
Fw size 65536  
Total time 1 minutes

ESV 92

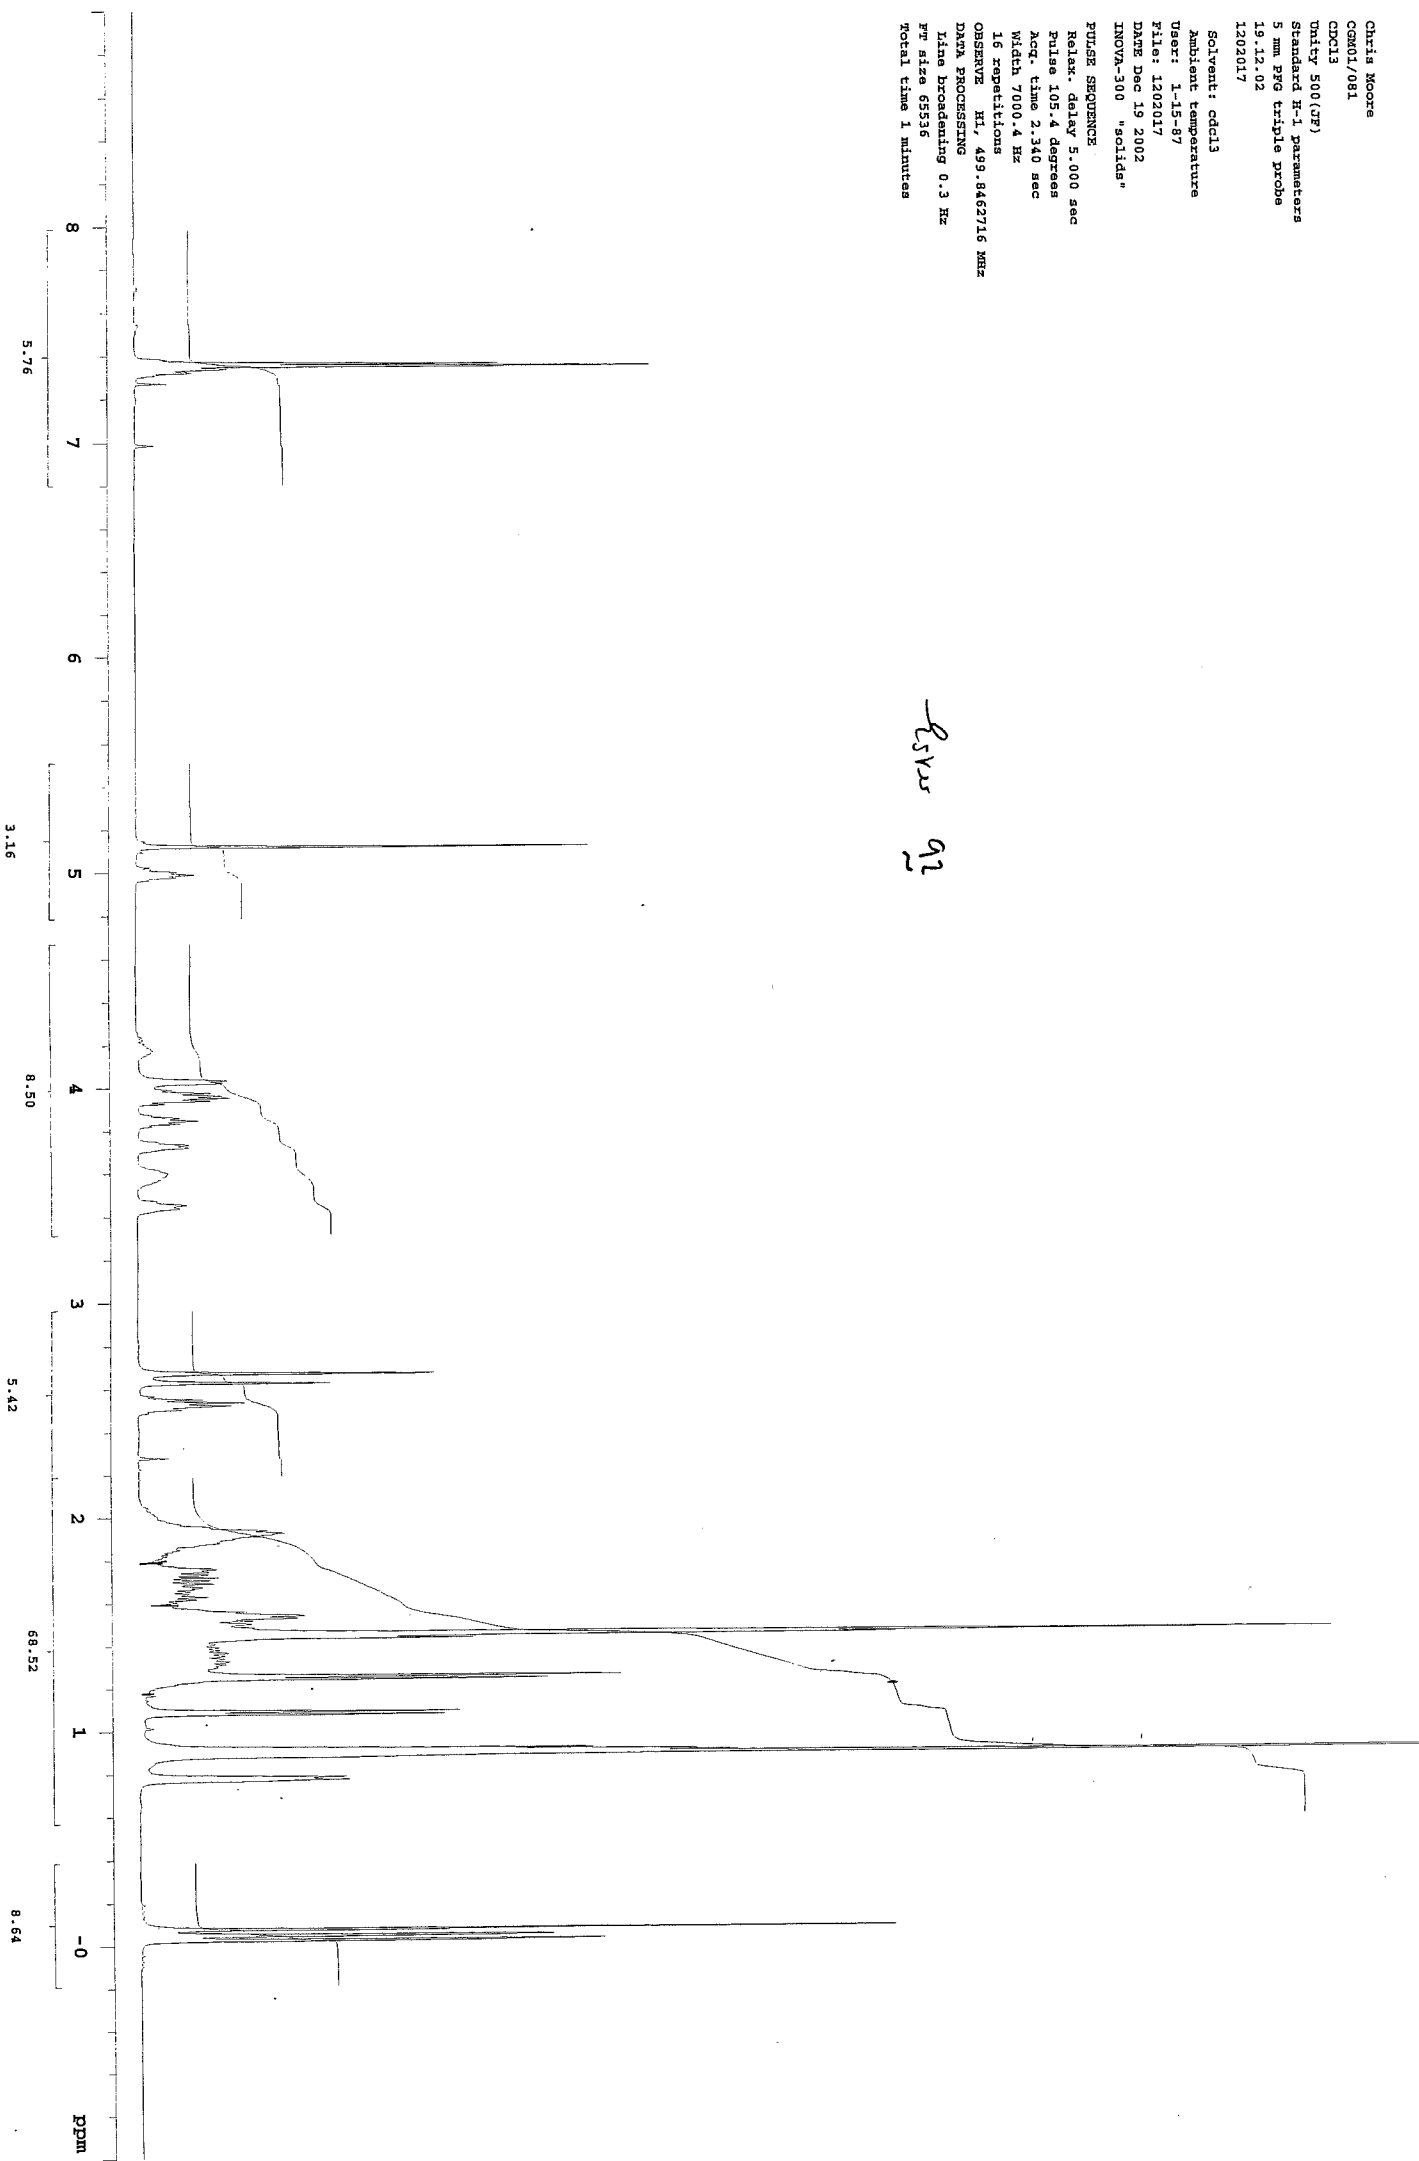



Narresh Kumar  
NR-573-10mg  
cdcl3  
Inova 400 (TP)  
Aramis  
Proton 400MHz  
29-01-01  
851

Pulse Sequence: zgpg30  
Solvent: cdcl3  
Ambient temperature  
User: 1-12-87  
File: 851-29-01-NR-TP  
INOVA-400 "aramis"  
PULSE SEQUENCE  
Relax. delay 5.000 sec  
Pulse 36.0 degrees  
Acq. time 3.998 sec  
Width 5602.2 Hz  
32 repetitions  
OBSERVE HI, 399.9584379 MHz  
DATA PROCESSING  
PR size 65536  
Total time 4 min, 48 sec

Macrodialin 95

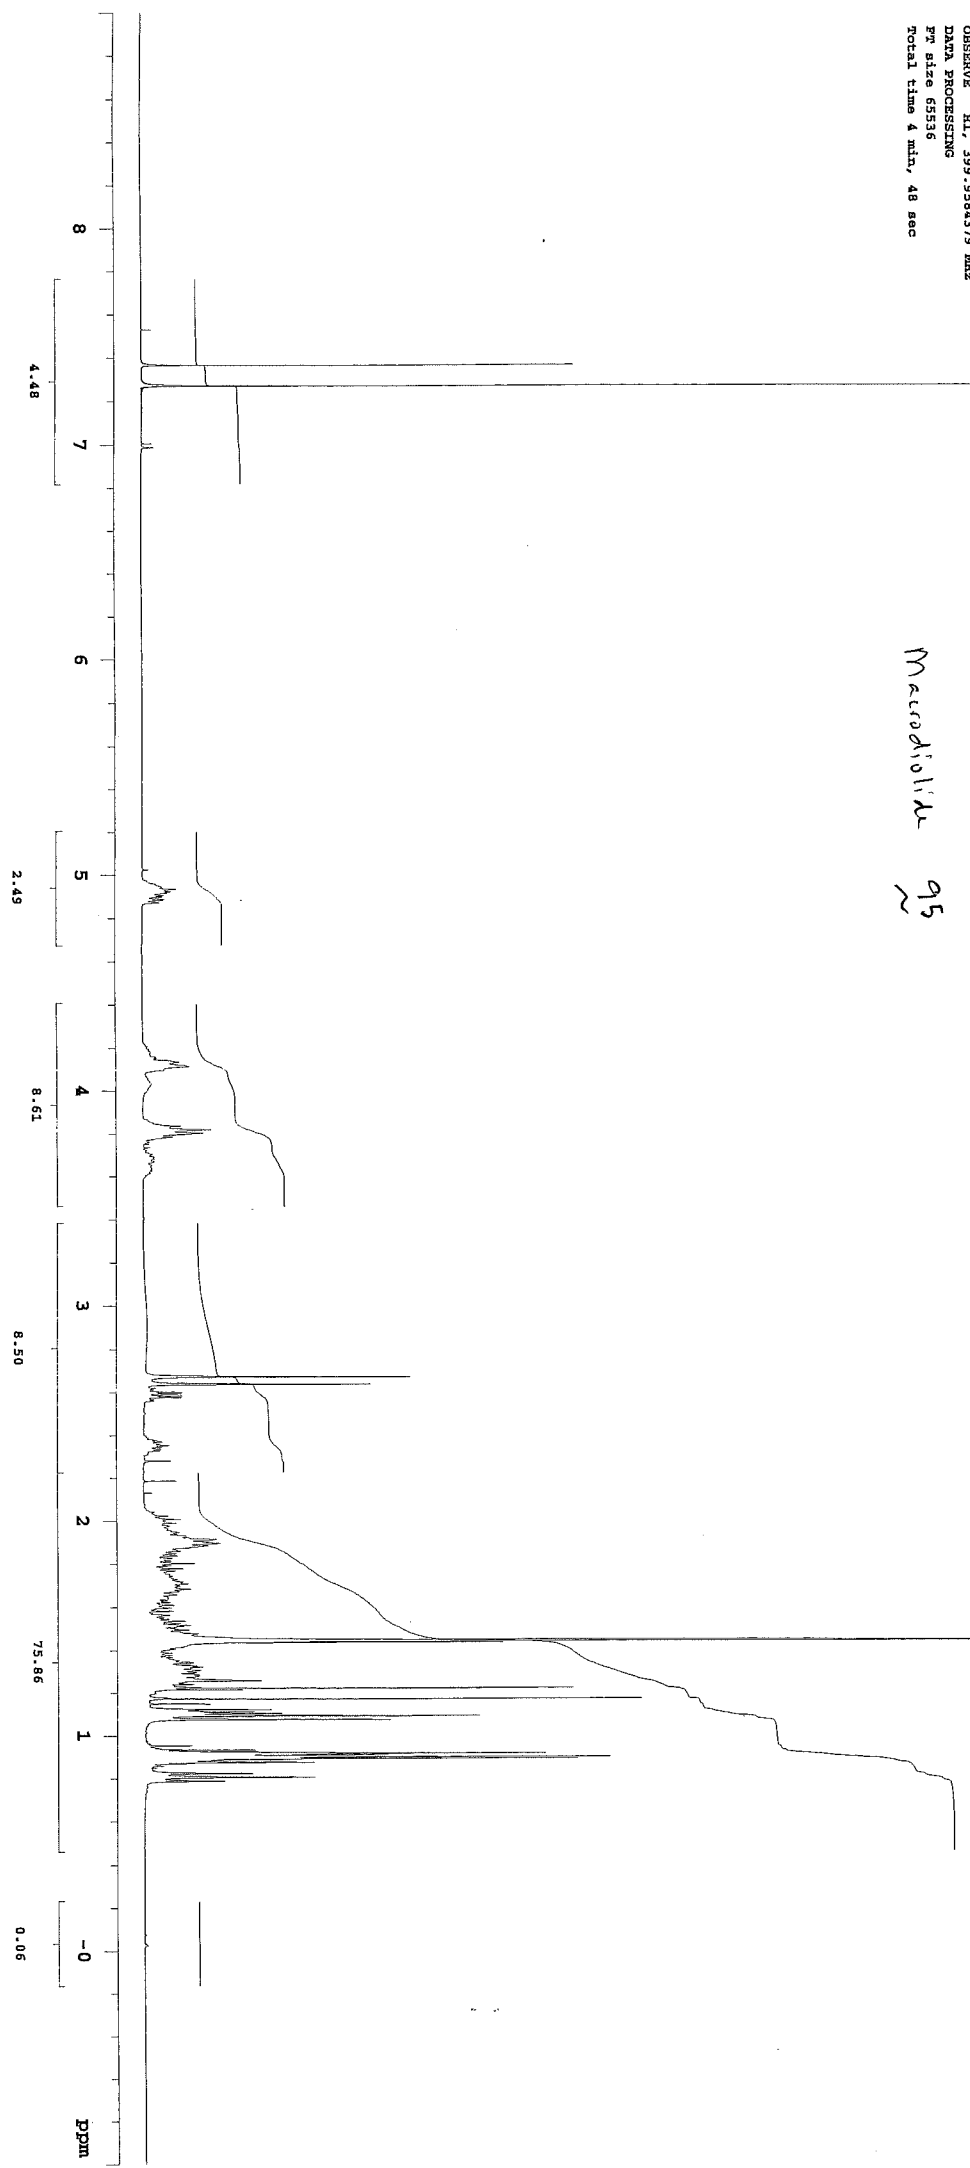

O: Germany  
OG 593  
cdcl3  
INOVA 400 (IP)  
Aramis  
Proton 400MHz  
13.02.01

Pulse Sequence: zgpg30  
Solvent: cdcl3  
Ambient temperature  
User: 1-12-87  
INOVA-400 "aramis"  
PULSE SEQUENCE  
Relax. delay 5.000 sec  
Pulse 36.0 degrees  
Acq. time 3.998 sec  
Width 5602.2 Hz  
64 repetitions  
OBSERVE H1, 399.9584381 MHz  
DATA PROCESSING  
F2 size 65536  
Total time 9 min, 36 sec

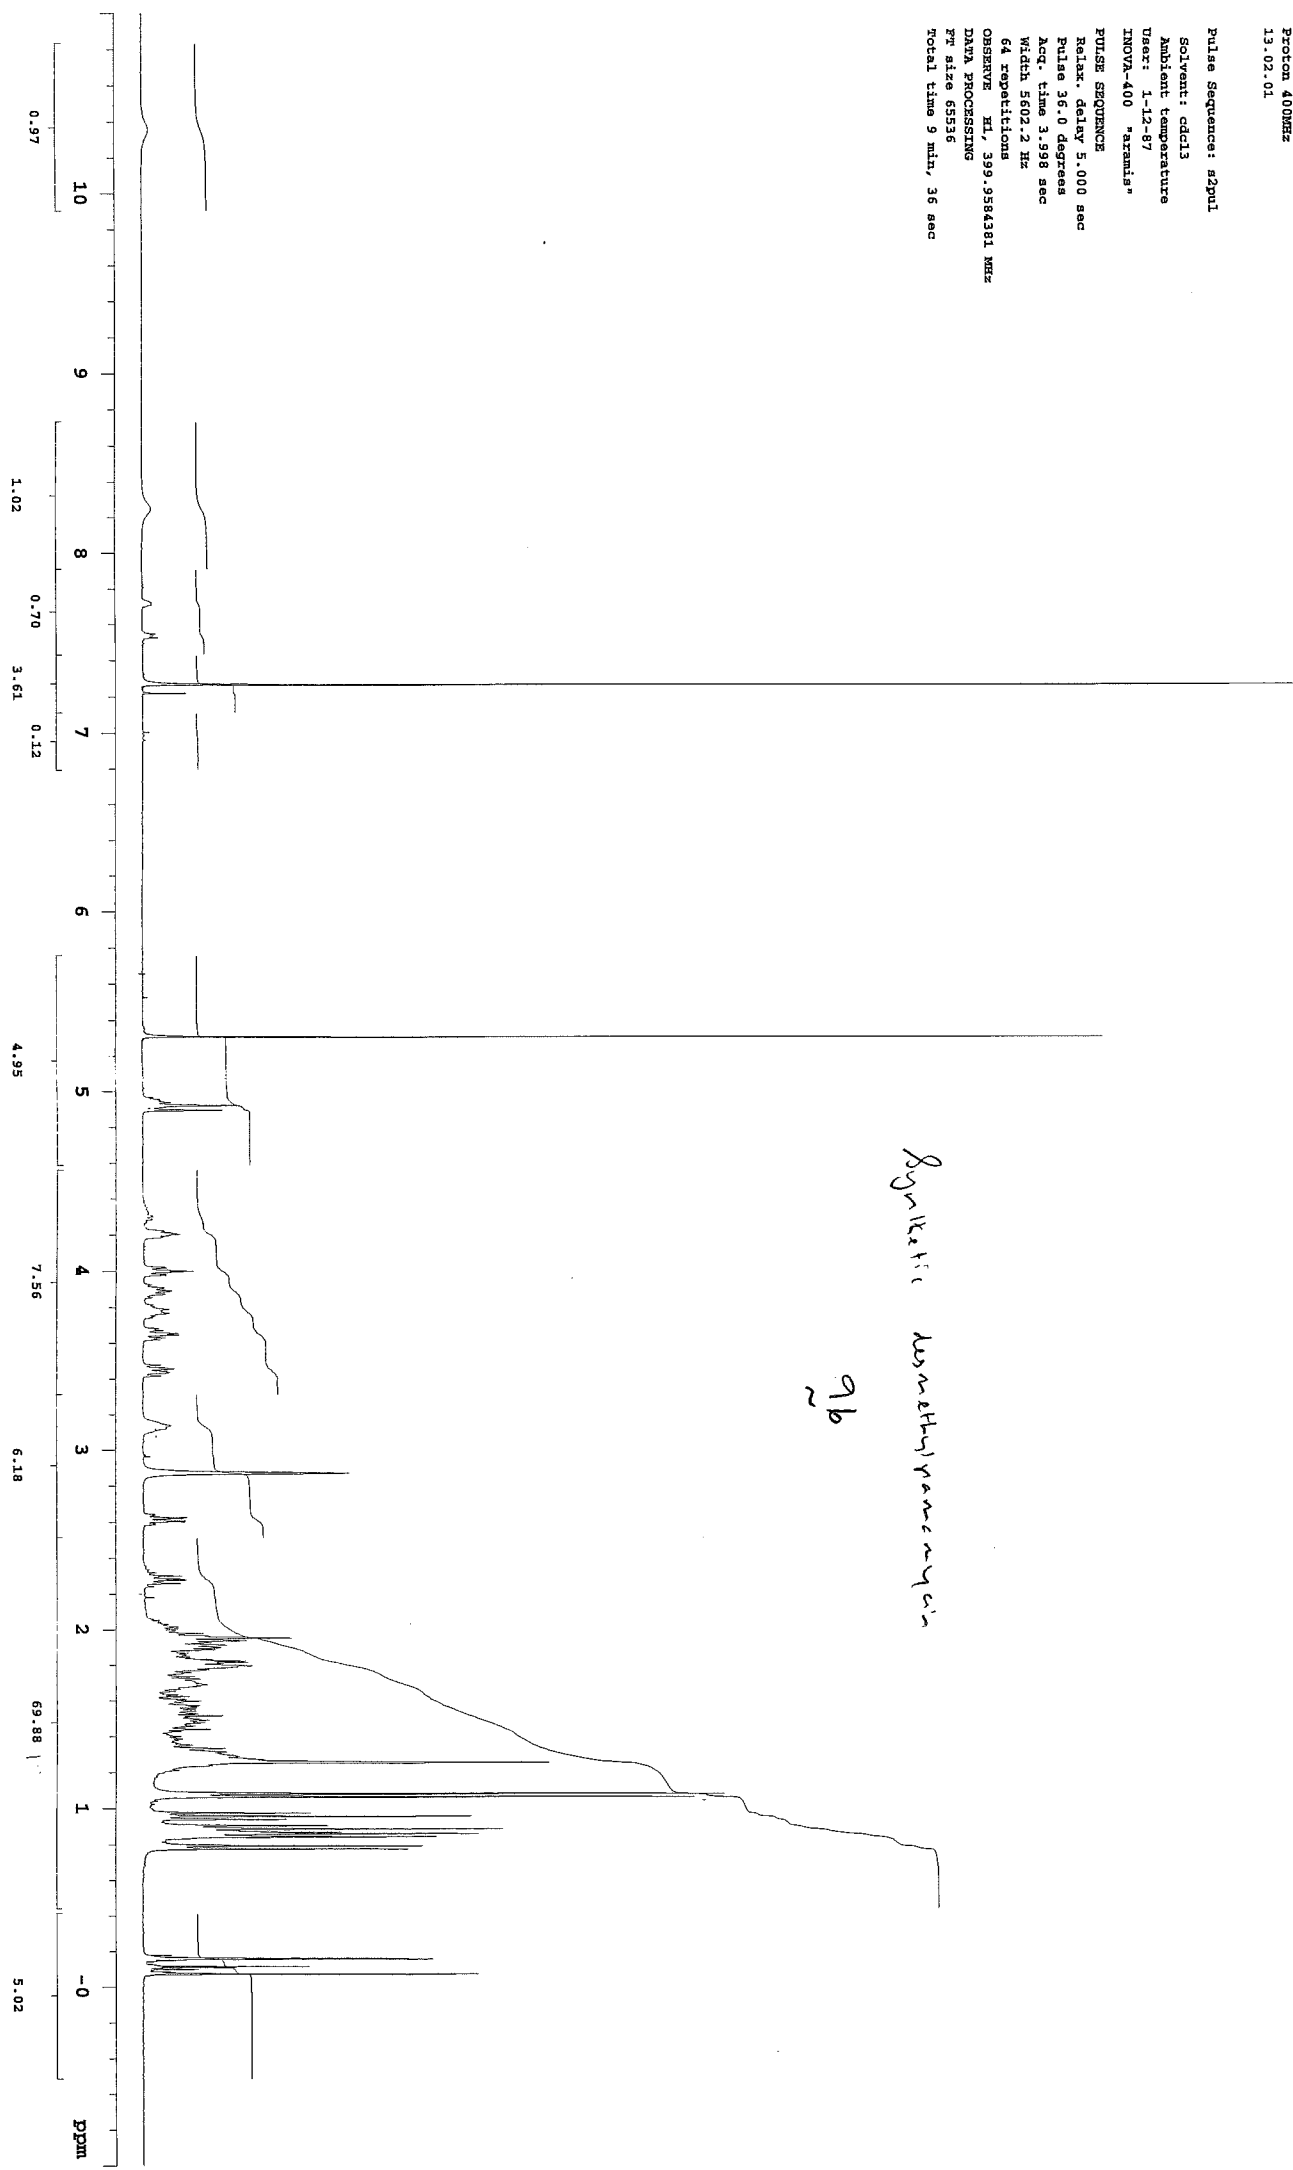

synthetic compound  
9b

Andrew Balawes  
Panamycin 607 Natural (Isolated)  
Acetone-D6  
INOVA 400(RS)  
Acorns  
Proton 400MHz  
11.04.01  
129

Solvent: acetone  
Ambient temperature  
User: 1-12-87  
File: 129  
Date Apr 11 2001  
INOVA-300 "athos"  
PULSE SEQUENCE  
Relax. delay 5.000 sec  
Pulse 36.0 degrees  
Acq. time 4.000 sec  
Width 6000.6 Hz  
32 repetitions  
OBSERVE H1, 399.9605218 MHz  
DATA PROCESSING  
F2 size 65536  
Total time 4 minutes

Natural Panamycin 607 1

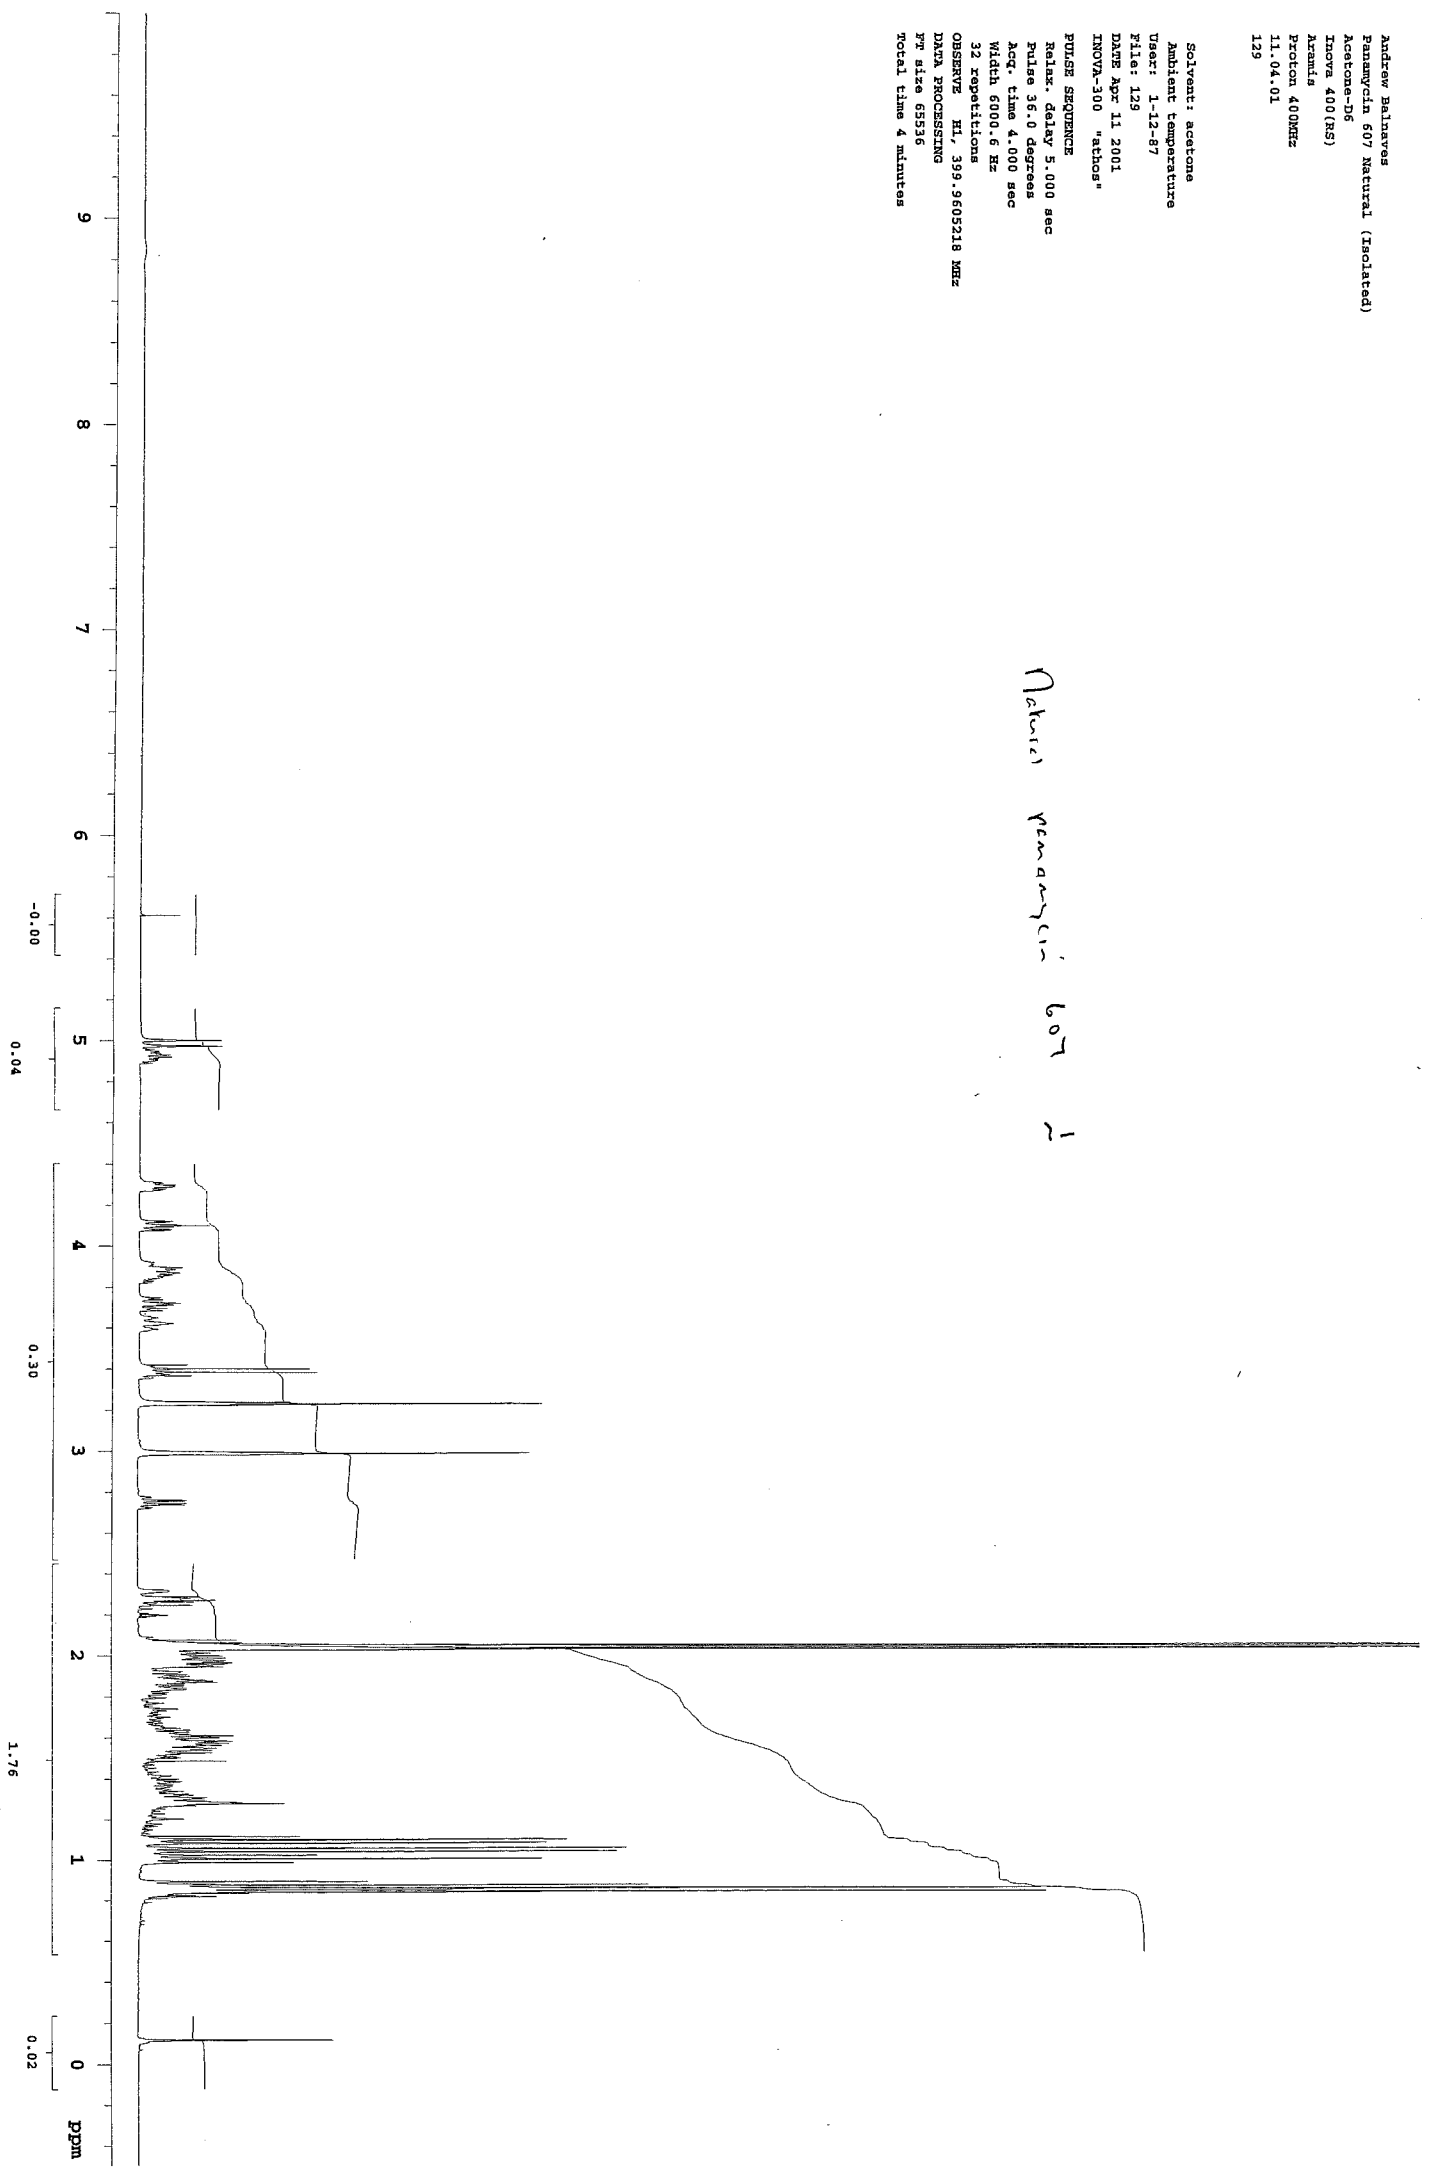

Andrew Balinaves  
Panamycin 607 Synthetic  
Acetone-D6  
Inova 400(RS)  
Aramis  
Proton 400MHz  
11.04.01  
128

Pulse Sequence: zgpg30  
Solvent: acetone  
Ambient Temperature  
User: 1-12-87  
File: 128-11-04-AB-RS  
INOVA-400 "aramis"  
PULSE SEQUENCE  
Relax. delay 5.000 sec  
Pulse 36.0 degrees  
Acq. time 4.000 sec  
Wdth 6000.6 Hz  
32 repetitions  
OBSERVE HI, 399.9605218 MHz  
DATA PROCESSING  
F1 size 65536  
Total time 4 min, 48 sec

*Synthetic panamycin 607*

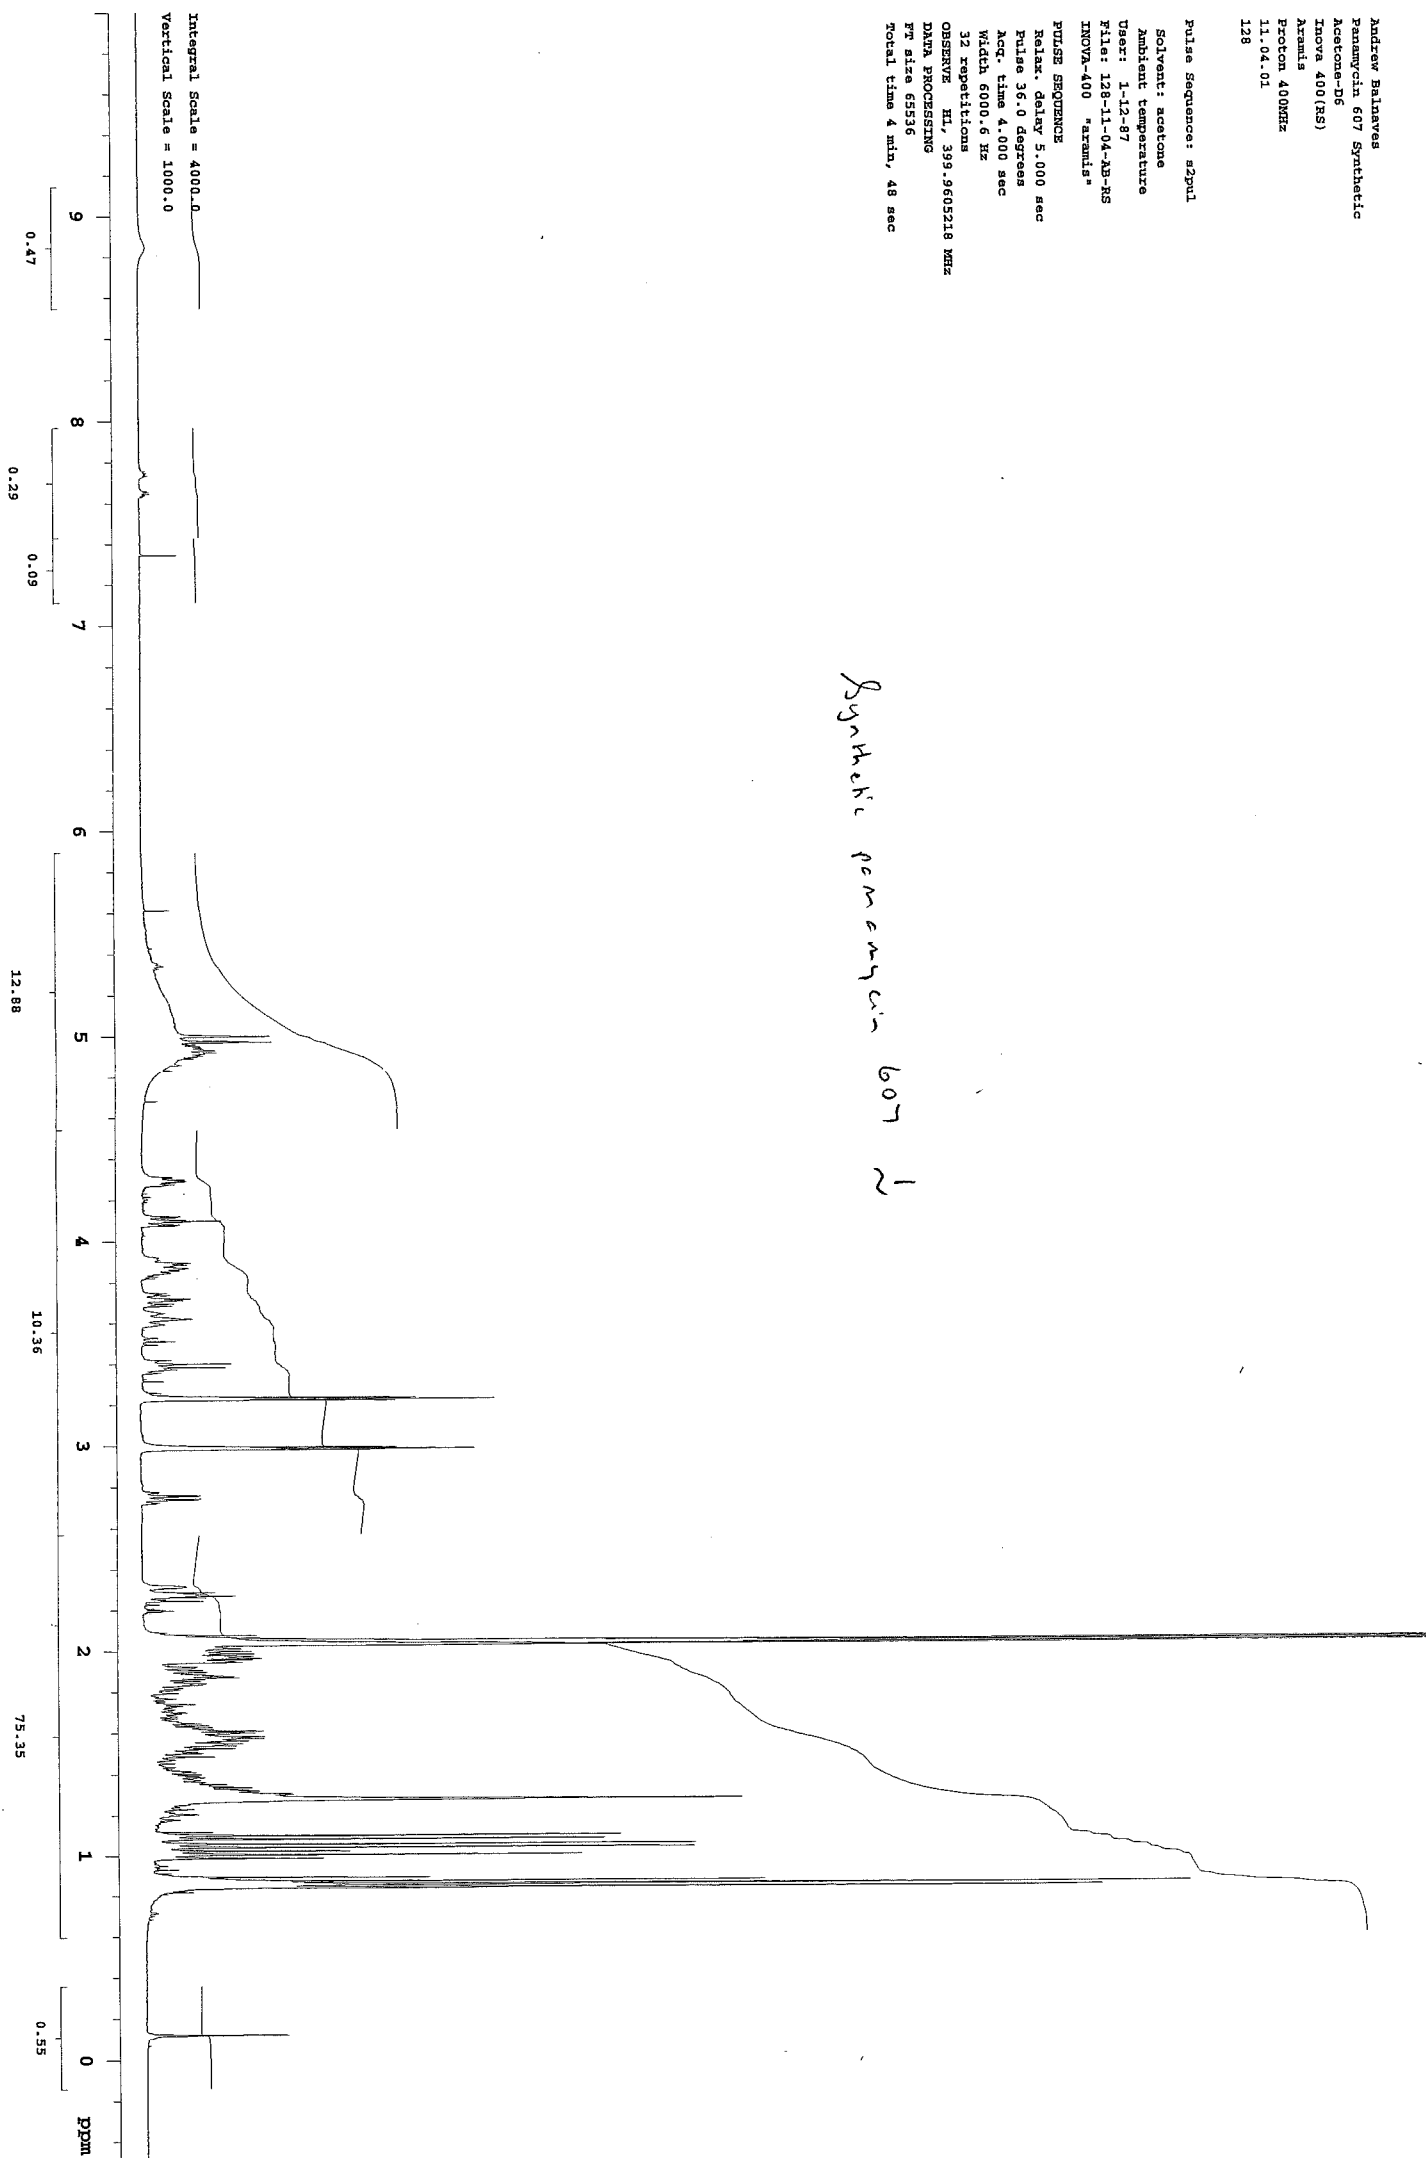

Paul Evans  
Panamycin 607 940 (1)

(C<sub>6</sub>)CO  
+ C<sub>3</sub>CO<sub>2</sub>B

(Sgaiteriv)

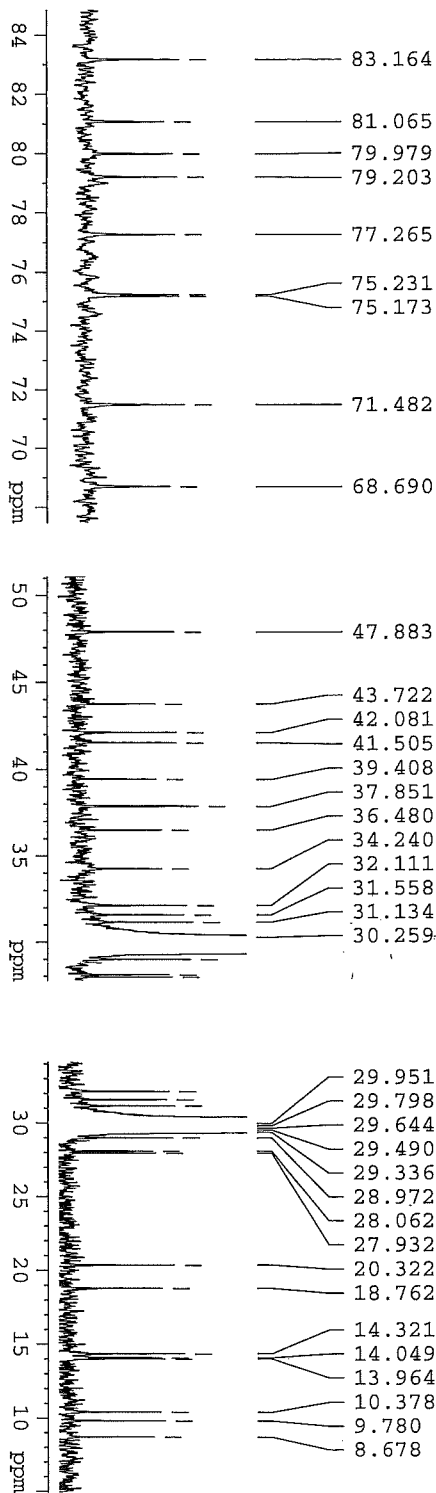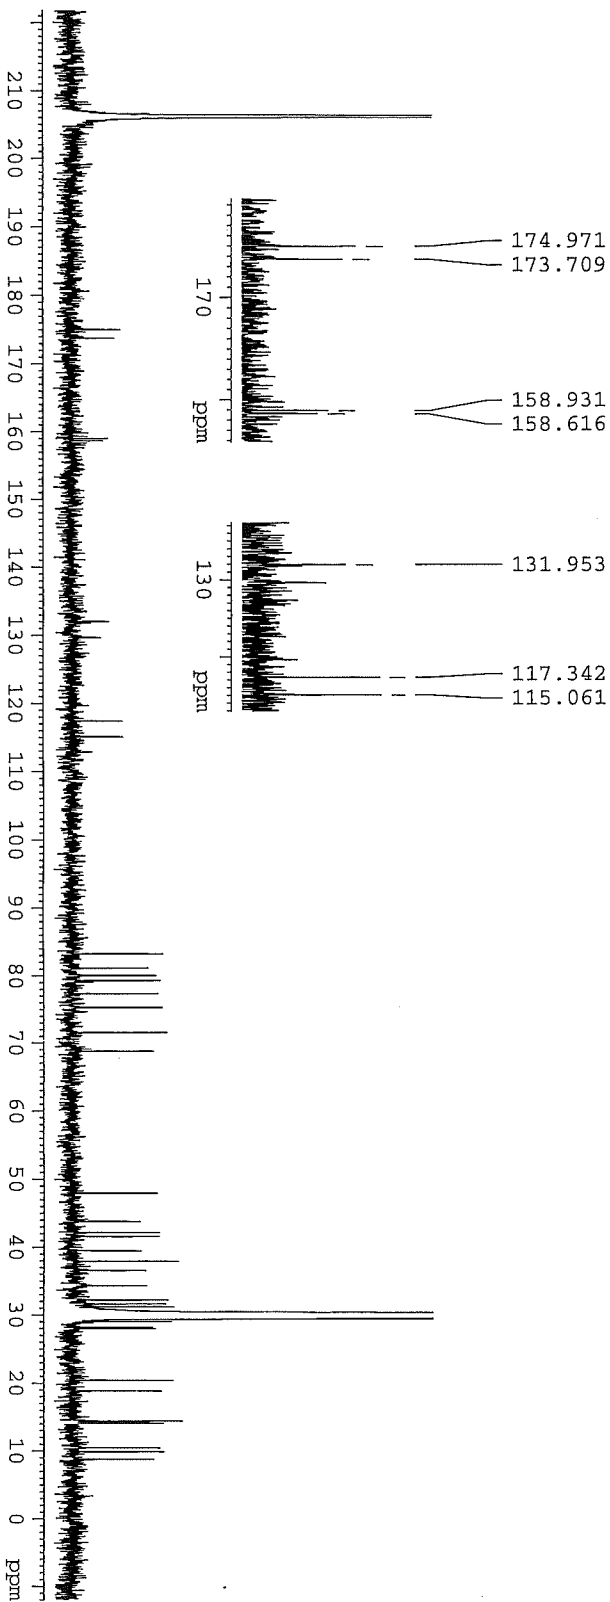

Current Data Parameters  
NAME Feb15-2001-ser  
EXPNO 50  
PROCNO 1

F2 - Acquisition Parameters  
Date\_ 20010216  
Time 16.02

INSTRUM spect  
PROBHD 5 mm Dual 13  
PULPROG zgpg30  
TD 65536  
SOLVENT Aceton  
NS 38000  
DS 2

SWH 29411.766 Hz  
FIDRES 0.448788 Hz  
AQ 1.1141620 sec  
RG 32768  
DW 17.000 usec  
DE 21.25 usec  
TE 300.0 K

NUCLEUS 13C  
D1 5.00000000 sec  
CPDPRG waltz16  
P31 82.00 usec  
S4 18 dB  
D11 0.03000000 sec  
S2 18 dB  
P1 7.80 usec  
SF01 125.7728844 MHz

F2 - Processing parameters  
SI 32768  
SF 125.7590981 MHz  
WDW EM  
SSB 0  
LB 3.00 Hz  
GB 0  
PC 1.40

1D NMR plot parameters  
CX 20.00 cm  
F1P 33.862 ppm  
F1 4258.44 Hz  
F2P 12.079 ppm  
F2 1518.98 Hz  
PEWCM 1.08917 ppm/cm  
HZCM 136.97289 Hz/cm
